# Supplementary material for: The fitness landscape of the African Salmonella Typhimurium ST313 strain D23580 reveals unique properties of the pBT1 plasmid
Source: PubMed Central journal article supplement (PMC6785131; doi:10.1371/journal.ppat.1007948), 2019-09-27
Supplement: ppat.1007948.s013.pdf [file ppat.1007948.s013.pdf]

| Strains                              | Lag time (h) | Maximum OD <sub>600</sub> | Maximal growth rate (doubling / h) |
|--------------------------------------|--------------|---------------------------|------------------------------------|
| D23580 WT                            | 3.2          | 4.55                      | 1.03                               |
| D23580 $\Delta$ ssrAB:: <i>frt</i>   | 3.3          | 4.58                      | 1.03                               |
| D23580 $\Delta$ hilC:: <i>frt</i>    | 3.2          | 4.86                      | 0.99                               |
| D23580 $\Delta$ waaL:: <i>frt</i>    | 3.4          | 4.11                      | 0.97                               |
| D23580 $\Delta$ waaG:: <i>frt</i>    | 3.4          | 4.14                      | 1.00                               |
| D23580 $\Delta$ STM1630:: <i>frt</i> | 3.2          | 4.57                      | 1.06                               |

| Strains                              | Lag time (h) | Maximum OD <sub>600</sub> | Maximal growth rate (doubling / h) |
|--------------------------------------|--------------|---------------------------|------------------------------------|
| D23580 WT                            | 2.7          | 4.92                      | 0.98                               |
| D23580 $\Delta$ ssrAB:: <i>aph</i>   | 2.9          | 4.73                      | 0.95                               |
| D23580 $\Delta$ hilC:: <i>aph</i>    | 2.9          | 4.76                      | 0.94                               |
| D23580 $\Delta$ waaL:: <i>aph</i>    | 2.9          | 4.32                      | 1.1                                |
| D23580 $\Delta$ waaG:: <i>aph</i>    | 3.2          | 4.46                      | 0.99                               |
| D23580 $\Delta$ STM1630:: <i>aph</i> | 2.8          | 4.61                      | 0.96                               |
| D23580 $\Delta$ pBT1                 | 2.9          | 5.09                      | 1.01                               |

| Strains                                            | Lag time (h) | Maximum OD <sub>600</sub> | Maximal growth rate (doubling / h) |
|----------------------------------------------------|--------------|---------------------------|------------------------------------|
| D23580 WT                                          | 2.7          | 4.61                      | 0.92                               |
| D23580 $\Delta$ cysS <sup>pBT1</sup> :: <i>aph</i> | 4.2          | 4.69                      | 1.37                               |
| D23580 $\Delta$ cysS <sup>pBT1</sup> :: <i>frt</i> | 4.4          | 4.72                      | 1.35                               |
