# Supplementary material for: The fitness landscape of the African Salmonella Typhimurium ST313 strain D23580 reveals unique properties of the pBT1 plasmid
Source: PubMed Central journal article supplement (PMC6785131; doi:10.1371/journal.ppat.1007948), 2019-09-27
Supplement: ppat.1007948.s018.pdf [file ppat.1007948.s018.pdf]

| Bacterial Strains                                                           | Source     | Identifier                          |
|-----------------------------------------------------------------------------|------------|-------------------------------------|
| <i>S. Typhimurium</i> D23580 (ST313)                                        | [1,2]      | JH3621                              |
| <i>S. Typhimurium</i> 4/74 (ST19)                                           | [3]        | JH3676                              |
| <i>S. Typhimurium</i> D23580 $\Delta$ cysS <sup>pBT1</sup> ::aph            | [2]        | JH4298                              |
| <i>S. Typhimurium</i> D23580 $\Delta$ cysS <sup>pBT1</sup> ::frit           | [2]        | JH4299                              |
| <i>S. Typhimurium</i> D23580 $\Delta$ pBT1                                  | [2]        | JH4300                              |
| <i>S. Typhimurium</i> D23580 $\Delta$ ssrAB::aph                            | [4]        | SO-46                               |
| <i>S. Typhimurium</i> D23580 $\Delta$ ssrAB::frit                           | [4]        | SO-53                               |
| <i>S. Typhimurium</i> D23580 $\Delta$ hilC::aph                             | [4]        | JH4327                              |
| <i>S. Typhimurium</i> D23580 $\Delta$ hilC::frit                            | [4]        | JH4328                              |
| <i>S. Typhimurium</i> D23580 $\Delta$ waaG::aph                             | [5]        | JH3917                              |
| <i>S. Typhimurium</i> D23580 $\Delta$ waaG::frit                            | [4]        | JH4187                              |
| <i>S. Typhimurium</i> D23580 $\Delta$ waaL::aph                             | [4]        | SO-13                               |
| <i>S. Typhimurium</i> D23580 $\Delta$ waaL::frit                            | [4]        | SO-51                               |
| <i>S. Typhimurium</i> D23580 $\Delta$ argA::frit                            | This study | JH4372                              |
| <i>S. Typhimurium</i> 4/74 $\Delta$ argA::frit                              | This study | JH4369                              |
| <i>S. Typhimurium</i> D23580 Na <sup>R</sup>                                | This study | JH3796                              |
| <i>S. Typhimurium</i> D23580 $\Delta$ STM2475::frit                         | This study | JH4357                              |
| <i>S. Typhimurium</i> D23580 STM2475 <sup>4/74SNP</sup>                     | This study | JH4361                              |
| <i>S. Typhimurium</i> 4/74 $\Delta$ STM2475::frit                           | This study | JH4359                              |
| <i>S. Typhimurium</i> 4/74 STM2475 <sup>D23580SNP</sup>                     | This study | JH4360                              |
| <i>S. Typhimurium</i> D23580 $\Delta$ STM1630::aph                          | This study | JH4363                              |
| <i>S. Typhimurium</i> D23580 $\Delta$ STM1630::frit                         | This study | JH4366                              |
| <i>S. Typhimurium</i> D23580 STM1630 <sup>4/74SNP</sup>                     | This study | JH4362                              |
| <i>S. Typhimurium</i> D23580 $\Delta$ rpoE::frit                            | [4]        | JH4235                              |
| <i>S. Typhimurium</i> 4/74 $\Delta$ STM1630::frit                           | This study | JH4365                              |
| <b>Plasmids</b>                                                             |            |                                     |
| <i>frit-aph-frit</i> cassette template plasmid; Km <sup>R</sup>             | [6]        | pKD4                                |
| $\lambda$ Red recombination plasmid, temperature-inducible; Tc <sup>R</sup> | [7]        | pSIM5- <i>tet</i>                   |
| FLP recombinase expression plasmid; Tc <sup>R</sup>                         | [8]        | pCP20-TcR                           |
| pET28a expression vector; His-tag, Km <sup>R</sup>                          | Novagen    | pET28a                              |
| pET28a carrying <i>cysS</i> <sup>chr</sup>                                  | This study | pET28a- <i>cysS</i> <sup>chr</sup>  |
| pET28a carrying <i>cysS</i> <sup>pBT1</sup>                                 | This study | pET28a- <i>cysS</i> <sup>pBT1</sup> |

## Supporting references

1. Kingsley RA, Msefula CL, Thomson NR, Kariuki S, Holt KE, Gordon MA, et al. Epidemic multiple drug resistant *Salmonella* Typhimurium causing invasive disease in sub-Saharan Africa have a distinct genotype. *Genome Res.* 2009;19: 2279–2287. doi:10.1101/gr.091017.109
2. Canals R, Hammarlöf DL, Kröger C, Owen SV, Fong WY, Lacharme-Lora L, et al. Adding function to the genome of African *Salmonella* Typhimurium ST313 strain D23580. *PLOS Biol.* 2019;17: e3000059. doi:10.1371/journal.pbio.3000059
3. Rankin JD, Taylor RJ. The estimation of doses of *Salmonella typhimurium* suitable for the experimental production of disease in calves. *Vet Rec.* 1966;78: 706–707.
4. Lacharme-Lora L, Owen SV, Blundell R, Canals R, Wenner N, Perez-Sepulveda B, et al. The use of chicken and insect infection models to assess the virulence of African *Salmonella* Typhimurium ST313. *PLoS Negl Trop Dis.* 2019;13: e0007540. doi:10.1371/journal.pntd.0007540

5. Hammarlöf DL, Kröger C, Owen SV, Canals R, Lacharme-Lora L, Wenner N, et al. Role of a single noncoding nucleotide in the evolution of an epidemic African clade of *Salmonella*. *Proc Natl Acad Sci U S A*. 2018;115: E2614–E2623. doi:10.1073/pnas.1714718115
6. Datsenko KA, Wanner BL. One-step inactivation of chromosomal genes in *Escherichia coli* K-12 using PCR products. *Proc Natl Acad Sci U S A*. 2000;97: 6640–6645.
7. Koskiniemi S, Pránting M, Gullberg E, Näsvall J, Andersson DI. Activation of cryptic aminoglycoside resistance in *Salmonella enterica*. *Mol Microbiol*. 2011;80: 1464–1478. doi:10.1111/j.1365-2958.2011.07657.x
8. Kintz E, Davies MR, Hammarlöf DL, Canals R, Hinton JCD, van der Woude MW. A BTP1 prophage gene present in invasive non-typhoidal *Salmonella* determines composition and length of the O-antigen of the lipopolysaccharide. *Mol Microbiol*. 2015;96: 263–275. doi:10.1111/mmi.12933
