# Supplementary material for: The fitness landscape of the African Salmonella Typhimurium ST313 strain D23580 reveals unique properties of the pBT1 plasmid
Source: PubMed Central journal article supplement (PMC6785131; doi:10.1371/journal.ppat.1007948), 2019-09-27
Supplement: ppat.1007948.s019.pdf [file ppat.1007948.s019.pdf]

| Oligonucleotide                             | Oligonucleotide sequence (5'→3')                                                                    |
|---------------------------------------------|-----------------------------------------------------------------------------------------------------|
| PE PCR Tn-1                                 | AATGATACGGCGACCACCGAGATCTACACTCTTTCCCTACACGACGCT<br>CTTCCGATCT <b>CGTGAT</b> GCTTCAGGGTTGAGATGTGTA  |
| PE PCR Tn-4                                 | AATGATACGGCGACCACCGAGATCTACACTCTTTCCCTACACGACGCT<br>CTTCCGATCT <b>TGGTCAG</b> GCTTCAGGGTTGAGATGTGTA |
| PE PCR Tn-5                                 | AATGATACGGCGACCACCGAGATCTACACTCTTTCCCTACACGACGCT<br>CTTCCGATCT <b>CACTGT</b> GCTTCAGGGTTGAGATGTGTA  |
| PE PCR Tn-7                                 | AATGATACGGCGACCACCGAGATCTACACTCTTTCCCTACACGACGCT<br>CTTCCGATCT <b>GATCTG</b> GCTTCAGGGTTGAGATGTGTA  |
| PE PCR Tn-10                                | AATGATACGGCGACCACCGAGATCTACACTCTTTCCCTACACGACGCT<br>CTTCCGATCT <b>AAGCTAG</b> GCTTCAGGGTTGAGATGTGTA |
| PE PCR Tn-12                                | AATGATACGGCGACCACCGAGATCTACACTCTTTCCCTACACGACGCT<br>CTTCCGATCT <b>TACAAG</b> GCTTCAGGGTTGAGATGTGTA  |
| Fw-argA-P1                                  | TCGAATAATAATTCAGTGTGGGGCGCGCAATGATAAAGGAACGTGTG<br>TAGGCTGGAGCTGCTTC                                |
| Rv-argA-P2                                  | CCTGATAAGCGCAGCGCCATCAGGCCCCCTTGTATCCTAAATCCAT<br>ATGAATATCCTCCTTAG                                 |
| cysS pBT1 pET28a<br>OH Fwd                  | GCCGCGCGGCAGCCATATGCTAAAGATATACAATACATACTCGC                                                        |
| cysS pBT1 pET28a<br>OH Rev                  | TGGTGGTGGTGGTGCTTATTTACGGCGCCAGGTTGT                                                                |
| D23580<br>chromosomal cysS<br>pET28a OH Fwd | GCCGCGCGGCAGCCATATGTTAAAAATTTTTAATACACTGACACGCC                                                     |
| D23580<br>chromosomal cysS<br>pET28a OH Rev | TGGTGGTGGTGGTGCTTACTTACGTCGCCAGGTGG                                                                 |
| 2475-EcoRI-F                                | GGAATTCGGTACCGCTGAGTGAGGAA                                                                          |
| 2475-BamHI-R                                | CGGGATCCGGCCTAAAAGGCGCAATTA                                                                         |
| Fw-2475-P1                                  | ACAGCAGGAAATAGTATGAAAATAAATAATGGCCCCGATTATGCGTG<br>TAGGCTGGAGCTGCTTC                                |
| Rv-2475-P2                                  | ACCTGTTCTGTAGGCTGTGCAAAATTACTTCGTAGACTCAGGCGCCAT<br>ATGAATATCCTCCTTAG                               |
| STM1630p-474SNP                             | TCTTTGCCTTAGCCAGGCGCACACTCAATAATGATAGCAGTCAGATAA<br>TATGTACCAGGCATTAACCTCA                          |
| Fw-STM1630p                                 | ACAAAACCGCTGCCAAA                                                                                   |
| Rv-STM1630p-474                             | GGTACATATTATCTGACTGCTA                                                                              |
| Fw-STM1630-P1                               | AACTCTTCGATGCTTTTTGGCCTATTTAGGTGGTTTGGGATGGGGAGTG<br>TAGGCTGGAGCTGCTTC                              |
| Rv-STM1630-P2                               | AAGTTCTGCCGTCATTTACGCTCTTGCCAACCAGCATTTTATTACATA<br>TGAATATCCTCCTTAG                                |
