# Supplementary material for: The fitness landscape of the African Salmonella Typhimurium ST313 strain D23580 reveals unique properties of the pBT1 plasmid
Source: PLoS Pathog. 2019 Sep 27;15(9):e1007948. doi: 10.1371/journal.ppat.1007948 (PMC6785131; doi:10.1371/journal.ppat.1007948)
Supplement: S2 Table — Samples included: Input (for LB and InSPI2), LB (output), InSPI2 (output), Input 1 (for Macrophage), Input 2 (for Macrophage), Macrophage 1 (output), and Macrophage 2 (output). (XLSX) [file ppat.1007948.s010.xlsx]

## Sheet: Content S2 Table
S2 Table tabs	Contents
a. Input (for LB & InSPI2)	Number of reads, transposon insertion sites, insertion index, and requirement call per gene in the input sample of the S. Typhimurium D23580 transposon library for the three passages in LB and InSPI2 conditions.
b. LB (output)	Number of reads, transposon insertion sites, insertion index, and requirement call per gene in the output sample of the S. Typhimurium D23580 transposon library after three passages in LB.
c. InSPI2 (output)	Number of reads, transposon insertion sites, insertion index, and requirement call per gene in the output sample of the S. Typhimurium D23580 transposon library after three passages in SPI2-inducing medium (InSPI2).
d. Input 1 (for Macrophage)	Number of reads, transposon insertion sites, insertion index, and requirement call per gene in the input sample, biological replicate 1, of the S. Typhimurium D23580 transposon library for infection of macrophages.
e. Input 2 (for Macrophage)	Number of reads, transposon insertion sites, insertion index, and requirement call per gene in the input sample, biological replicate 2, of the S. Typhimurium D23580 transposon library for infection of macrophages.
f. Macrophage 1 (output)	Number of reads, transposon insertion sites, insertion index, and requirement call per gene in the output sample, biological replicate 1, of the S. Typhimurium D23580 transposon library from infected macrophages.
g. Macrophage 2 (output)	Number of reads, transposon insertion sites, insertion index, and requirement call per gene in the output sample, biological replicate 2, of the S. Typhimurium D23580 transposon library from infected macrophages.

## Sheet: a. Input (for LB & InSPI2)
locus_tag	gene_name	start	end	strand	read_count	ins_index	gene_length	ins_count	function	call
STMMW_00001	thrL	169	255	1	183	0.597701	87	52	thr operon leader peptide	not required
STMMW_00011	thrA	337	2799	1	1940	0.278116	2463	685	aspartokinase I/homoserine dehydrogenase I	not required
STMMW_00021	thrB	2801	3730	1	548	0.2	930	186	HK	not required
STMMW_00031	thrC	3734	5020	1	824	0.229215	1287	295	threonine synthase	not required
STMMW_00041	yaaA	5114	5887	-1	409	0.25969	774	201	conserved hypothetical protein	not required
STMMW_00051	yaaJ	5966	7396	-1	821	0.244584	1431	350	putative amino-acid transport protein	not required
STMMW_00061	talB	7665	8618	1	552	0.22327	954	213	transaldolase B	not required
STMMW_00071	mog	8729	9319	1	344	0.219966	591	130	molybdopterin biosynthesis Mog protein	not required
STMMW_00081	yaaH	9376	9942	-1	374	0.209877	567	119	putative membrane protein	not required
STMMW_00091	htgA	10092	10805	-1	531	0.288515	714	206	conserved hypothetical protein	not required
STMMW_00101	yaaI	10841	11245	-1	308	0.293827	405	119	putative exported protein	not required
STMMW_00111	dnaK	11593	13509	1	24	0.00678143	1917	13	DnaK protein (heat shock protein 70)	required
STMMW_00121	dnaJ	13595	14734	1	69	0.0298246	1140	34	DNAJ protein	required
STMMW_00131	STMMW_00131	15014	15961	1	480	0.183544	948	174	putative regulatory protein	not required
STMMW_00141	STMMW_00141	16088	16432	1	46	0.0724638	345	25	putative phage protein	ambiguous
STMMW_00151	STMMW_00151	16493	17026	-1	657	0.421348	534	225	conserved hypothetical protein	not required
STMMW_00161	STMMW_00161	17043	17486	-1	188	0.123874	444	55	putative membrane protein	not required
STMMW_00171	chiA	17867	19966	1	1284	0.26381	2100	554	putative chitinase	not required
STMMW_00181	STMMW_00181	20058	23054	1	2138	0.248582	2997	745	putative chitinase	not required
STMMW_00191	STMMW_00191	23335	24039	1	640	0.375887	705	265	conserved hypothetical protein	not required
STMMW_00201	bcfA	24469	25011	1	1142	0.567219	543	308	fimbrial subunit	not required
STMMW_00211	bcfB	25112	25798	1	577	0.342067	687	235	fimbrial chaperone	not required
STMMW_00221	bcfC	25803	28424	1	2100	0.263539	2622	691	fimbrial usher protein	not required
STMMW_00231	bcfD	28425	29432	1	766	0.286706	1008	289	fimbrial subunit	not required
STMMW_00241	bcfE	29433	29978	1	271	0.208791	546	114	fimbrial subunit	not required
STMMW_00251	bcfF	29994	30512	1	316	0.258189	519	134	fimbrial subunit	not required
STMMW_00261	bcfG	30478	31209	1	462	0.219945	732	161	fimbrial chaperone	not required
STMMW_00271	bcfH	31274	32119	1	524	0.205674	846	174	putative exported protein	not required
STMMW_00281	STMMW_00281	32116	32445	1	321	0.248485	330	82	putative membrane protein	not required
STMMW_00291	STMMW_00291	32545	32994	-1	14	0.0155556	450	7	putative membrane protein	required
STMMW_00301	STMMW_00301	33364	34368	1	65	0.0467662	1005	47	putative transcriptional regulator (LysR family)	required
STMMW_00311	STMMW_00311	34376	34816	-1	21	0.0340136	441	15	putative transcriptional regulator	required
STMMW_00331	STMMW_00331	35339	37057	1	3334	0.529959	1719	911	possible sulfatase	not required
STMMW_00341	STMMW_00341	37103	38674	-1	1598	0.328244	1572	516	putative secreted 5'-nucleotidase	not required
STMMW_00351	STMMW_00351	38773	39534	-1	238	0.143045	762	109	putative exported protein	not required
STMMW_00361	STMMW_00361	40131	41624	1	1425	0.344043	1494	514	putative secreted sulfatase	not required
STMMW_00371	STMMW_00371	41723	42913	1	938	0.277918	1191	331	possible sulfatase regulatory protein	not required
STMMW_00381	STMMW_00381	42932	44185	1	1879	0.413876	1254	519	conserved hypothetical protein	not required
STMMW_00391	STMMW_00391	44312	46027	1	2579	0.473776	1716	813	possible sulfatase	not required
STMMW_00401	nhaA	46190	47356	1	374	0.137961	1167	161	Na( )/H( ) antiporter 1	not required
STMMW_00411	nhaR	47418	48317	1	531	0.242222	900	218	transcriptional activator protein NhaR	not required
STMMW_00421	STMMW_00421	48372	50411	-1	1245	0.227451	2040	464	putative glycosyl hydrolase	not required
STMMW_00431	STMMW_00431	50451	51824	-1	1371	0.291121	1374	400	putative transport protein	not required
STMMW_00441	rpsT	52280	52543	-1	2	0.00757576	264	2	30S ribosomal protein S20	required
STMMW_00451	yaaY	52649	52864	1	24	0.087963	216	19	conserved hypothetical protein	not required
STMMW_00461	ribF	52872	53810	1	3	0.00319489	939	3	riboflavin biosynthesis protein RibF	required
STMMW_00471	ileS	53855	56689	1	45	0.00529101	2835	15	isoleucyl-tRNA synthetase	required
STMMW_00481	lspA	56689	57189	1	11	0.00798403	501	4	lipoprotein signal peptidase	required
STMMW_00491	fkpB	57344	57793	1	242	0.186667	450	84	probable FkbB-type 16 kD peptidyl-prolyl cis- trans isomerase	not required
STMMW_00501	ispH	57796	58746	1	54	0.0178759	951	17	LytB protein	required
STMMW_00511	STMMW_00511	58946	60148	1	1059	0.315046	1203	379	conserved hypothetical protein	not required
STMMW_00521	rihC	60164	61084	1	874	0.323561	921	298	putative nucleoside hydrolase (IUNH family)	not required
STMMW_00531	citB2	61106	61792	-1	946	0.429403	687	295	transcriptional regulatory protein citb	not required
STMMW_00541	citA2	61794	63413	-1	4473	0.630247	1620	1021	sensor kinase cita	not required
STMMW_00551	STMMW_00551	63548	64849	-1	2092	0.490783	1302	639	oxaloacetate decarboxylase beta chain (ec 4.1.1.3)	not required
STMMW_00561	STMMW_00561	64862	66637	-1	2593	0.442005	1776	785	oxaloacetate decarboxylase alpha chain	not required
STMMW_00571	oadG	66654	66893	-1	220	0.304167	240	73	oxaloacetate decarboxylase gamma chain 1	not required
STMMW_00581	STMMW_00581	67052	68392	-1	1319	0.290082	1341	389	citrate-sodium symporter	not required
STMMW_00591	citC2	68637	69680	1	701	0.264368	1044	276	[citrate (PRO-3S)-lyase] ligase	not required
STMMW_00601	citD2	69710	70003	1	172	0.231293	294	68	citrate lyase acyl carrier protein	not required
STMMW_00611	citE2	70000	70869	1	951	0.326437	870	284	citrate lyase beta chain	not required
STMMW_00621	citF2	70880	72400	1	1301	0.285996	1521	435	citrate lyase alpha chain	not required
STMMW_00631	citX2	72400	72951	1	652	0.349638	552	193	citx protein	not required
STMMW_00641	citG2	72929	73837	1	659	0.238724	909	217	citg protein	not required
STMMW_00651	dapB	74017	74838	1	2	0.00243309	822	2	dihydrodipicolinate reductase	required
STMMW_00661	STMMW_00661	75088	75436	1	117	0.131805	349	46	putative viral protein (pseudogene)	not required
STMMW_00681	carA	75881	77029	1	409	0.144473	1149	166	carbamoyl-phosphate synthase small chain	not required
STMMW_00691	carB	77048	80275	1	1635	0.204771	3228	661	carbamoyl-phosphate synthase large chain	not required
STMMW_00701	caiF	80549	80944	1	743	0.555556	396	220	transcriptional activator CaiF	not required
STMMW_00711	caiE	81021	81617	-1	655	0.289782	597	173	carnitine operon protein CaiE	not required
STMMW_00721	caiD	81726	82511	-1	753	0.288804	786	227	carnitine racemase	not required
STMMW_00731	caiC	82565	84118	-1	1580	0.368082	1554	572	probable crotonobetaine/carnitine-CoA ligase	not required
STMMW_00741	caiB	84181	85398	-1	1272	0.344828	1218	420	L-carnitine dehydratase	not required
STMMW_00751	caiA	85510	86652	-1	1072	0.295713	1143	338	probable carnitine operon oxidoreductase CaiA	not required
STMMW_00761	caiT	86687	88204	-1	1869	0.34058	1518	517	probable carnitine transporter	not required
STMMW_00771	fixA	88685	89455	1	677	0.347601	771	268	FixA protein	not required
STMMW_00781	fixB	89471	90412	1	841	0.281316	942	265	FixB protein	not required
STMMW_00791	fixC	90462	91748	1	874	0.247086	1287	318	FixC protein	not required
STMMW_00801	fixX	91745	92032	1	112	0.190972	288	55	ferredoxin like protein FixX	not required
STMMW_00811	yaaU	92095	93519	1	1049	0.246316	1425	351	putative metabolite transport protein	not required
STMMW_00821	STMMW_00821	93575	93838	1	220	0.261364	264	69	putative lipoprotein	not required
STMMW_00841	STMMW_00841	94132	94548	1	676	0.446043	417	186	probable secreted protein	not required
STMMW_00851	STMMW_00851	94772	95062	-1	294	0.350515	291	102	probable secreted protein	not required
STMMW_00861	STMMW_00861	95132	95224	-1	286	0.666667	93	62		not required
STMMW_00871	STMMW_00871	95272	95466	1	105	0.148718	195	29	putative inner membrane protein	not required
STMMW_00881	STMMW_00881	95960	97849	1	2331	0.408995	1890	773	putative sulfatase	not required
STMMW_00891	STMMW_00891	98054	98119	-1	33	0.19697	66	13		not required
STMMW_00901	yabF	98256	98786	1	376	0.26742	531	142	putative NAD(P)H oxidoreductase	not required
STMMW_00911	kefC	98779	100641	1	686	0.164788	1863	307	glutathione-regulated potassium-efflux system protein KefC	not required
STMMW_00921	folA	100840	101319	1	192	0.129167	480	62	dihydrofolate reductase type I	not required
STMMW_00931	apaH	101425	102273	-1	204	0.141343	849	120	bis(5'-nucleosyl)-tetraphosphatase	not required
STMMW_00941	apaG	102284	102661	-1	412	0.351852	378	133	CorD protein	not required
STMMW_00951	ksgA	102664	103485	-1	237	0.180049	822	148	dimethyladenosine transferase	not required
STMMW_00961	pdxAa	103482	104471	-1	689	0.290909	990	288	pyridoxal phosphate biosynthetic protein PdxA	not required
STMMW_00971	surA	104471	105757	-1	694	0.229992	1287	296	survival protein SurA precursor	not required
STMMW_00981	imp	105811	108171	-1	16	0.00508259	2361	12	organic solvent tolerance protein precursor	required
STMMW_00991	djlA	108425	109237	1	860	0.323493	813	263	DNAj-like protein	not required
STMMW_01001	rluA	109332	109991	-1	595	0.3	660	198	ribosomal large subunit pseudouridine synthase A	not required
STMMW_01011	hepA	110003	112909	-1	2132	0.258686	2907	752	probable ATP-dependent helicase HepA	not required
STMMW_01021	polB	113083	115434	-1	1719	0.264456	2352	622	DNA polymerase II	not required
STMMW_01031	STMMW_01031	115478	116098	-1	1390	0.425121	621	264	probable secreted protein	not required
STMMW_01041	STMMW_01041	116193	116252	-1	56	0.233333	60	14		not required
STMMW_01051	STMMW_01051	116300	116602	1	403	0.30363	303	92	putative inner membrane protein	not required
STMMW_01061	STMMW_01061	116817	117236	1	285	0.392857	420	165	hypothetical protein	not required
STMMW_01071	araD	117242	117937	-1	539	0.264368	696	184	L-ribulose-5-phosphate 4-epimerase	not required
STMMW_01081	araA	118078	119580	-1	1269	0.303393	1503	456	L-arabinose isomerase	not required
STMMW_01091	araB	119591	121300	-1	1930	0.352632	1710	603	L-ribulokinase	not required
STMMW_01101	araC	121641	122486	1	724	0.322695	846	273	arabinose operon regulatory protein	not required
STMMW_01111	yabI	122605	123372	1	752	0.33724	768	259	DedA family integral membrane protein	not required
STMMW_01121	thiQ	123411	124118	-1	685	0.303672	708	215	hypothetical ABC transporter	not required
STMMW_01131	thiP	124102	125712	-1	1687	0.345127	1611	556	putative ABC transporter integral membrane protein	not required
STMMW_01141	tbpA	125688	126671	-1	738	0.302846	984	298	thiamine-binding periplasmic protein precursor	not required
STMMW_01151	yabN	126849	128507	-1	1476	0.299578	1659	497	putative ABC transporter periplasmic solute binding protein	not required
STMMW_01152	sgrT	128600	128722	1	56	0.195122	123	24	hypothetical protein	not required
STMMW_01161	leuD	129058	129663	-1	538	0.330033	606	200	3-isopropylmalate dehydratase small subunit	not required
STMMW_01171	leuC	129674	131074	-1	1442	0.340471	1401	477	3-isopropylmalate dehydratase large subunit	not required
STMMW_01181	leuB	131077	132168	-1	1132	0.327839	1092	358	3-IPM-DH	not required
STMMW_01191	leuA	132168	133739	-1	1460	0.286896	1572	451	2-isopropylmalate synthase	not required
STMMW_01201	leuL	133827	133913	-1	386	0.666667	87	58	leu operon leader peptide	not required
STMMW_01211	leuO	134570	135514	1	1506	0.48254	945	456	probable activator protein in leuABCD operon	not required
STMMW_01221	ilvI	135899	137560	1	1652	0.31769	1662	528	acetolactate synthase isozyme III large subunit	not required
STMMW_01231	ilvH	137563	138054	1	303	0.203252	492	100	acetolactate synthase isozyme III small subunit	not required
STMMW_01241	fruR	138338	139342	1	300	0.140299	1005	141	fructose repressor	not required
STMMW_01251	mraZ	139948	140406	1	229	0.102397	459	47	Protein mraZ	not required
STMMW_01261	mraW	140408	141349	1	178	0.0583864	942	55	S-adenosyl-methyltransferase	ambiguous
STMMW_01271	ftsL	141346	141711	1	22	0.0327869	366	12	cell division protein FtsL	required
STMMW_01281	ftsI	141727	143493	1	20	0.00396152	1767	7	penicillin-binding protein 3 precursor	required
STMMW_01291	murE	143480	144967	1	3	0.00201613	1488	3	Meso-diaminopimelate-adding enzyme	required
STMMW_01301	murF	144964	146322	1	15	0.00367918	1359	5	UDP-N-acetylmuramoylalanyl-D-glutamyl-2,6-diami nopimelate--D-alan alanyl ligase	required
STMMW_01311	mraY	146316	147398	1	13	0.00461681	1083	5	UDP-MurNAc-pentapeptide phosphotransferase	required
STMMW_01321	murD	147401	148717	1	20	0.00683371	1317	9	D-glutamic acid adding enzyme	required
STMMW_01331	ftsW	148804	149961	1	0	0	1158	0	cell division protein FtsW	required
STMMW_01341	murG	149958	151025	1	9	0.00468165	1068	5	UDP-N-acetylglucosamine--N-acetylmuramyl-	required
STMMW_01351	murC	151144	152619	1	27	0.00338753	1476	5	UDP-N-acetylmuramate--L-alanine ligase	required
STMMW_01361	ddl	152612	153532	1	419	0.10532	921	97	D-alanine--D-alanine ligase	not required
STMMW_01371	ftsQ	153534	154364	1	64	0.0240674	831	20	cell division protein FtsQ	required
STMMW_01381	ftsA	154361	155623	1	4	0.00158353	1263	2	cell division protein FtsA	required
STMMW_01391	ftsZ	155684	156835	1	6	0.00347222	1152	4	cell division protein FtsZ	required
STMMW_01401	lpxC	156936	157853	1	59	0.0239651	918	22	UDP-3-O-[3-hydroxymyristoyl] N-acetylglucosamine deacetylase	required
STMMW_01411	yacA	158201	158629	1	71	0.0839161	429	36	conserved hypothetical protein	not required
STMMW_01421	secA	158691	161396	1	243	0.026238	2706	71	preprotein translocase SecA subunit	required
STMMW_01431	mutT	161548	161943	1	404	0.29798	396	118	7,8-dihydro-8-oxoguanine-triphosphatase	not required
STMMW_01441	yacG	162265	162456	-1	72	0.203125	192	39	conserved hypothetical protein	not required
STMMW_01451	yacF	162466	163209	-1	896	0.397849	744	296	conserved hypothetical protein	not required
STMMW_01461	coaE	163209	163829	-1	79	0.0644122	621	40	dephospho-CoA kinase	ambiguous
STMMW_01471	guaC	164055	165098	1	2072	0.472222	1044	493	GMP reductase	not required
STMMW_01481	pilC	165129	166331	-1	2333	0.534497	1203	643	protein transport protein HofC	not required
STMMW_01491	pilB	166321	167706	-1	3583	0.542569	1386	752	protein transport protein HofB	not required
STMMW_01501	pilA	167716	168153	-1	1419	0.623288	438	273	prepilin peptidase dependent protein D precursor	not required
STMMW_01511	nadC	168375	169121	-1	1534	0.512718	747	383	nicotinate-nucleotide pyrophosphorylase	not required
STMMW_01521	ampD	169356	169919	1	1482	0.560284	564	316	AmpD protein (anhydro-N-acetylmuramyl-tripeptide amidase)	not required
STMMW_01531	ampE	169916	170770	1	2456	0.566082	855	484	AmpE protein	not required
STMMW_01541	STMMW_01541	170862	171812	-1	1584	0.48265	951	459	putatuve glycosysl hydrolase	not required
STMMW_01551	STMMW_01551	171812	173218	-1	2799	0.535892	1407	754	putative symporter	not required
STMMW_01561	aroP	173382	174755	-1	2273	0.461426	1374	634	aromatic amino acid transport protein AroP	not required
STMMW_01571	pdhR	175318	176082	1	660	0.2	765	153	pyruvate dehydrogenase complex repressor	not required
STMMW_01581	aceE	176242	178905	1	41	0.00863363	2664	23	pyruvate dehydrogenase E1 component	required
STMMW_01591	aceF	178920	180809	1	16	0.00740741	1890	14	dihydrolipoamide acetyltransferase component (E2) of pyruvate dehydrogenase	required
STMMW_01601	lpdA	181009	182433	1	10	0.00631579	1425	9	dihydrolipoamide dehydrogenase	required
STMMW_01611	STMMW_01611	182722	183006	1	229	0.25614	285	73	probable secreted protein	not required
STMMW_01621	STMMW_01621	183044	183835	-1	805	0.353535	792	280	probable secreted protein	not required
STMMW_01631	yacH	183848	185462	-1	2598	0.447059	1615	722	putative exported protein (pseudogene)	not required
STMMW_01641	acnB	185851	188448	1	918	0.167436	2598	435	aconitate hydratase 2 (citrate hydro-lyase 2)	not required
STMMW_01651	STMMW_01651	188509	189351	-1	30	0.0177936	843	15	HNH endonuclease	required
STMMW_01661	yacL	189597	189959	1	585	0.479339	363	174	conserved hypothetical protein	not required
STMMW_01671	kdgT	190194	191147	1	718	0.259958	954	248	2-keto-3-deoxygluconate permease	not required
STMMW_01681	STMMW_01681	191144	192415	1	1786	0.349057	1272	444	conserved hypothetical protein	not required
STMMW_01691	pdxAb	192405	193388	1	991	0.340447	984	335	4-hydroxythreonine-4-phosphate dehydrogenase	not required
STMMW_01701	STMMW_01701	193398	194165	1	1170	0.41276	768	317	putative transcriptional regulator	not required
STMMW_01711	speD	194195	194989	-1	1099	0.421384	795	335		not required
STMMW_01721	speE	195010	195870	-1	1826	0.528455	861	455	Putrescine aminopropyltransferase	not required
STMMW_01731	yacC	195977	196324	-1	425	0.408046	348	142	putative exported protein	not required
STMMW_01741	cueO	196526	198136	1	3952	0.569212	1611	917	possible multicopper oxidase precursor	not required
STMMW_01751	gcd	198214	200604	-1	4716	0.542869	2391	1298	glucose dehydrogenase	not required
STMMW_01761	hpt	200810	201346	1	601	0.333333	537	179	hypoxanthine phosphoribosyltransferase	not required
STMMW_01771	yadF	201404	202066	-1	34	0.0346908	663	23	carbonic anhydrase	required
STMMW_01781	yadG	202175	203101	1	1002	0.355987	927	330	hypothetical ABC transporter ATP-binding protein	not required
STMMW_01791	yadH	203098	203868	1	1087	0.381323	771	294	ABC transporter integral membrane protein	not required
STMMW_01801	stiH	203985	205064	-1	2144	0.525	1080	567	putative fimbriae	not required
STMMW_01811	stiC	205073	207619	-1	4648	0.458579	2547	1168	putativie fimbrial usher. putativie fimbrial usher	not required
STMMW_01821	stiB	207646	208329	-1	1084	0.445906	684	305	putative fimbrial chaperone	not required
STMMW_01831	stiA	208377	208916	-1	1406	0.542593	540	293	putative fimbrial subunit	not required
STMMW_01841	yadI	209286	209726	1	1157	0.675737	441	298	putative PTS system IIA component	not required
STMMW_01851	yadE	209788	211017	1	1522	0.426829	1230	525	putative exported protein	not required
STMMW_01861	panD	211024	211404	-1	418	0.425197	381	162	Aspartate alpha-decarboxylase	not required
STMMW_01871	panC	211499	212353	-1	836	0.329825	855	282	Pantoate activating enzyme	not required
STMMW_01881	panB	212479	213270	-1	913	0.377525	792	299	3-methyl-2-oxobutanoate hydroxymethyltransferase	not required
STMMW_01891	folK	213391	213870	-1	143	0.102083	480	49	2-amino-4-hydroxy-6- hydroxymethyldihydropteridinepyrophosphokinase	not required
STMMW_01901	pcnB	213867	215285	-1	1027	0.264271	1419	375	poly(A) polymerase	not required
STMMW_01911	yadB	215426	216367	-1	1058	0.345011	942	325	glutamyl-tRNA synthetase-related protein	not required
STMMW_01921	dksA	216391	216846	-1	351	0.274123	456	125	dosage-dependent dnaK suppressor protein	not required
STMMW_01931	sfsA	217023	217727	-1	732	0.310638	705	219	Sugar fermentation stimulation protein homolog	not required
STMMW_01941	ligT	217744	218274	-1	526	0.346516	531	184	2'-5' RNA ligase	not required
STMMW_01951	hrpB	218302	220776	1	2884	0.351919	2475	871	ATP-dependent helicase HrpB	not required
STMMW_01961	mrcB	220917	223439	1	3061	0.364249	2523	919	penicillin-binding protein 1B	not required
STMMW_01971	fhuA	223732	225921	1	2034	0.321005	2190	703	ferrichrome-iron receptor	not required
STMMW_01981	fhuC	225970	226767	1	473	0.20802	798	166	ferrichrome transport ATP-binding protein FhuC	not required
STMMW_01991	fhuD	226767	227657	1	526	0.199776	891	178	ferrichrome-binding periplasmic protein precursor	not required
STMMW_02001	fhuB	227654	229711	1	1087	0.188533	2058	388	ferrichrome transport protein FhuB precursor	not required
STMMW_02011	stfA	230650	231210	1	1050	0.57041	561	320	major fimbrial subunit stfa (putative fimbrial subunit)	not required
STMMW_02021	stfC	231296	233953	1	4403	0.482694	2658	1283	outer membrane usher protein stfc (putative fimbrial outer membrane usher)	not required
STMMW_02031	stfD	233971	234723	1	1248	0.454183	753	342	periplasmic fimbrial chaperone stfd	not required
STMMW_02041	stfE	234787	235254	1	1005	0.551282	468	258	minor fimbrial subunit stfe (putaive minor fimbrial subunit)	not required
STMMW_02051	stfF	235251	235727	1	573	0.42348	477	202	minor fimbrial subunit stff	not required
STMMW_02061	stfG	235727	236257	1	1046	0.506591	531	269	putative minor fimbrial subunit	not required
STMMW_02071	STMMW_02071	236257	237096	1	1763	0.520238	840	437	putative exported protein	not required
STMMW_02081	hemL	237203	238483	-1	44	0.0265418	1281	34	GSA	required
STMMW_02091	clcA	238653	240074	1	1598	0.369902	1422	526	H /Cl-exchange transporter clcA	not required
STMMW_02101	yadR	240111	240500	1	31	0.0410256	390	16	conserved hypothetical protein	required
STMMW_02111	yadS	240601	241224	-1	1017	0.458333	624	286	putative membrane protein	not required
STMMW_02121	btuF	241261	242061	-1	744	0.31211	801	250	Vitamin B12 transport protein btuF precursor	not required
STMMW_02131	mtn	242054	242752	-1	76	0.055794	699	39	MTA/SAH nucleosidase	ambiguous
STMMW_02141	dgt	242837	244354	1	4326	0.581028	1518	882	dGTP triphosphohydrolase	not required
STMMW_02151	htrA	244484	245911	1	1885	0.392157	1428	560	heat shock protein HtrA	not required
STMMW_02161	cdaR	246064	247221	1	1334	0.348877	1158	404	conserved hypothetical protein	not required
STMMW_02171	yaeH	247310	247696	-1	436	0.392765	387	152	conserved hypothetical protein	not required
STMMW_02181	STMMW_02181	247943	249244	1	1458	0.399386	1302	520	putative inner membrane protein	not required
STMMW_02191	dapD	249281	250105	-1	57	0.0278788	825	23	2,3,4,5-tetrahydropyridine-2-carboxylate N- succinyltransferase	required
STMMW_02201	glnD	250135	252807	-1	140	0.0243172	2673	65	PII uridylyl-transferase	required
STMMW_02211	map	253044	253838	-1	7	0.00880503	795	7	methionine aminopeptidase	required
STMMW_02221	rpsB	254289	255014	1	15	0.00964187	726	7	30S ribosomal protein S2	required
STMMW_02231	tsf	255272	256123	1	13	0.00704225	852	6	EF-Ts	required
STMMW_02241	pyrH	256268	256993	1	5	0.00413223	726	3	UK	required
STMMW_02251	frr	257140	257697	1	3	0.00537634	558	3	RRF	required
STMMW_02261	dxr	257838	259034	1	26	0.0125313	1197	15	1-deoxy-D-xylulose 5-phosphate reductoisomerase	required
STMMW_02271	uppS	259347	260105	1	2	0.00263505	759	2	undecaprenyl pyrophosphate synthetase	required
STMMW_02281	cdsA	260118	260975	1	45	0.016317	858	14	phosphatidate cytidylyltransferase	required
STMMW_02291	yaeL	260987	262339	1	34	0.0206948	1353	28	putative membrane protein	required
STMMW_02301	yaeT	262371	264785	1	8	0.00331263	2415	8	outer membrane protein precursor	required
STMMW_02311	hlpA	264908	265393	1	164	0.0967078	486	47	outer membrane protein OmpH precursor	not required
STMMW_02321	lpxD	265397	266422	1	34	0.00779727	1026	8	UDP-3-O-[3-hydroxymyristoyl] glucosamine N- acyltransferase	required
STMMW_02331	fabZ	266528	266983	1	6	0.0109649	456	5	(3R)-hydroxymyristol acyl carrier protein dehydrase	required
STMMW_02341	lpxA	266987	267775	1	2	0.00253485	789	2	UDP-N-acetylglucosamine acyltransferase	required
STMMW_02351	lpxB	267775	268923	1	15	0.00522193	1149	6	lipid-A-disaccharide synthase	required
STMMW_02361	rnhB	268920	269516	1	162	0.0854271	597	51	RNase HII	not required
STMMW_02371	dnaE	269540	273022	1	90	0.00287109	3483	10	DNA polymerase III, alpha chain	required
STMMW_02381	accA	273035	273994	1	20	0.00625	960	6	acetyl-coenzyme A carboxylase carboxyl transferase subunit alpha	required
STMMW_02391	STMMW_02391	274174	275937	1	1408	0.272109	1764	480	putative secreted chitinase	not required
STMMW_02401	ldcC	276013	278154	1	1491	0.267507	2142	573	lysine decarboxylase	not required
STMMW_02411	yaeR	278210	278599	1	350	0.289744	390	113	conserved hypothetical protein	not required
STMMW_02421	mesJ	278743	279954	1	66	0.0140264	1212	17	cell cycle protein MesJ	required
STMMW_02431	rof	280038	280298	-1	154	0.283525	261	74	ROF protein	not required
STMMW_02441	yaeP	280285	280503	-1	233	0.442922	219	97	conserved hypothetical protein	not required
STMMW_02451	yaeQ	280683	281228	1	423	0.267399	546	146	conserved hypothetical protein	not required
STMMW_02461	yaeJ	281225	281647	1	267	0.257683	423	109	putative release factor	not required
STMMW_02471	cutF	281679	282380	1	651	0.287749	702	202	copper homeostasis protein CutF precursor (lipoprotein nlpE)	not required
STMMW_02481	proS	282454	284172	-1	25	0.0122164	1719	21	prolyl-tRNA synthetase	required
STMMW_02491	yaeB	284283	284990	-1	461	0.268362	708	190	conserved hypothetical protein	not required
STMMW_02501	rcsF	284987	285391	-1	584	0.414815	405	168	RcsF protein	not required
STMMW_02511	metQ	285510	286325	-1	910	0.411765	816	336	putative lipoprotein precursor	not required
STMMW_02521	yaeE	286364	287017	-1	890	0.43578	654	285	putative ABC transporter permease protein	not required
STMMW_02531	abc	287010	288041	-1	961	0.343023	1032	354	putative ABC transporter ATP-binding protein	not required
STMMW_02532	yaeD	288231	288797	1	49	0.0705467	567	40	D-glycero-D-manno-heptose 1,7-bisphosphate phosphatase	ambiguous
STMMW_02541	dkgB	295056	295859	1	177	0.105721	804	85	hypothetical oxidoreductase	not required
STMMW_02551	yafC	295880	296794	-1	268	0.11694	915	107	hypothetical transcriptional regulator	not required
STMMW_02561	STMMW_02561	296899	298074	1	412	0.140306	1176	165	putative drug efflux protein	not required
STMMW_02571	yafD	298227	299006	1	241	0.128205	780	100	Hypothetical UPF0294 protein <ORFName>	not required
STMMW_02581	yafE	299084	299854	1	314	0.172503	771	133	putative methyltransferase	not required
STMMW_02591	dniR	299910	301277	-1	549	0.169591	1368	232	membrane-bound lytic murein transglycosylase D precursor	not required
STMMW_02601	gloB	301349	302104	-1	194	0.116402	756	88	probable hydroxyacylglutathione hydrolase	not required
STMMW_02611	yafS	302139	302861	1	244	0.153527	723	111	conserved hypothetical protein	not required
STMMW_02621	rnhA	302858	303325	-1	146	0.132479	468	62	RNase H	not required
STMMW_02631	dnaQ	303389	304120	1	10	0.0136612	732	10	DNA polymerase III epsilon subunit	required
STMMW_02641	sciA	304652	305707	-1	462	0.172348	1056	182	conserved hypothetical pathogenicity island protein	not required
STMMW_02651	sciB	305718	306713	-1	576	0.200803	996	200	type VI secretion protein	not required
STMMW_02661	sciC	306710	308593	-1	884	0.195329	1884	368	type VI system protein	not required
STMMW_02671	sciD	308609	309103	-1	158	0.175758	495	87	putative type VI system cytoplasmic protein	not required
STMMW_02691	sciE	309100	309924	-1	279	0.129697	825	107	putative type VI secretion system protein	not required
STMMW_02701	sciF	309911	310813	-1	513	0.194906	903	176	conserved hypothetical protein	not required
STMMW_02711	sciG	311181	313820	1	1320	0.188258	2640	497	type VI system ATPase	not required
STMMW_02731	sciH	313920	314462	1	113	0.0791897	543	43	putative type VI secretion system protein	not required
STMMW_02741	sciI	314486	315979	1	483	0.114458	1494	171	type VI system secreted protein	not required
STMMW_02751	STMMW_02751	316042	316152	1	80	0.18018	111	20	invasol	not required
STMMW_02771	sciJ	316165	316611	1	262	0.192394	447	86	putative exported protein	not required
STMMW_02791	sciK	316865	317350	1	309	0.283951	486	138	putative hemolysin-coregulated protein	not required
STMMW_02811	STMMW_02811	317655	318140	1	92	0.0843621	486	41	conserved hypothetical protein	not required
STMMW_02831	STMMW_02831	318125	318508	1	19	0.0338542	384	13	putative periplasmic protein	required
STMMW_02841	sciK1	318651	319136	1	199	0.218107	486	106	putative hemolysin-coregulated protein	not required
STMMW_02851	sciN	319203	319739	1	95	0.0968343	537	52	putative lipoprotein	not required
STMMW_02861	sciO	319743	321086	1	732	0.127232	1344	171	putative type VI secretion protein	not required
STMMW_02871	sciP	321083	322387	1	440	0.144828	1305	189	putative type VI system protein	not required
STMMW_02881	sciQ	322392	323165	1	382	0.147287	774	114	putative inner membrane protein	not required
STMMW_02891	sciR	323356	323799	1	54	0.0540541	444	24	putative shiga-like toxin A subunit	ambiguous
STMMW_02901	sciS	323833	327702	1	1505	0.163824	3870	634	type VI system protein	not required
STMMW_02911	sciT	327702	328490	1	302	0.124208	789	98	conserved hypothetical protein	not required
STMMW_02921	sciU	328487	328903	1	357	0.282974	417	118	conserved hypothetical periplasmic protein	not required
STMMW_02931	sciV	328927	329448	1	532	0.283525	522	148	conserved hypothetical pathogenicity island protein	not required
STMMW_02941	vgrS	329845	332034	1	811	0.169863	2190	372	putative type VI system protein	not required
STMMW_02951	sciW	332058	332504	1	264	0.266219	447	119	conserved hypothetical protein	not required
STMMW_02961	rhs	332523	336617	1	2109	0.17265	4095	707	putative Rhs family protein	not required
STMMW_02971	STMMW_02971	336611	336874	1	77	0.0568182	264	15	conserved hypothetical protein	ambiguous
STMMW_02981	STMMW_02981	336890	337804	1	592	0.240437	915	220		not required
STMMW_02991	sciX	337801	338247	1	52	0.0447427	447	20	conserved hypothetical cytoplasmic protein	required
STMMW_03011	STMMW_03011	338431	338562	1	1	0.00757576	132	1	conserved hypothetical protein	required
STMMW_03021	sciY	338765	339244	1	3	0.00625	480	3	putative phosphotriesterase (pseudogene)	required
STMMW_03041	STMMW_03041	339300	339575	-1	282	0.391304	276	108	hypothetical protein	not required
STMMW_03051	STMMW_03051	340016	340324	1	10	0.02589	309	8	conserved hypothetical pathogenicity island protein	required
STMMW_03061	STMMW_03061	340361	340674	-1	395	0.464968	314	146	conserved hypothetical cytoplasmic protein (pseudogene)	not required
STMMW_03071	STMMW_03071	340727	340924	1	245	0.444444	198	88	putative transposase	not required
STMMW_03081	STMMW_03081	341004	341469	1	339	0.240343	466	112	putative IS1400 transposase B (pseudogene)	not required
STMMW_03091	safA	342181	342693	1	223	0.220273	513	113	lipoprotein	not required
STMMW_03101	safB	342801	343514	1	486	0.298319	714	213	salmonella atypical fimbria chaperone	not required
STMMW_03111	safC	343538	346048	1	1553	0.244126	2511	613	salmonella atypical fimbria outer membrane usher	not required
STMMW_03121	safD	346070	346540	1	283	0.186837	471	88	fimbrial structural subunit	not required
STMMW_03131	ybeJ	346946	347767	1	669	0.318735	822	262	conserved hypothetical protein	not required
STMMW_03132	STMMW_03132	347892	348107	1	191	0.25	216	54	conserved hypothetical protein	not required
STMMW_03133	STMMW_03133	348248	348379	1	86	0.166667	132	22	putative transposase	not required
STMMW_03151	sinR	348582	349529	1	122	0.0548523	948	52	LysR-family transcriptional regulator	ambiguous
STMMW_03161	STMMW_03161	349646	349861	1	71	0.240741	216	52	conserved hypothetical protein	not required
STMMW_03171	pagN	349865	350584	-1	564	0.3125	720	225	possible outer membrane adhesin	not required
STMMW_03181	sciZ	350915	351322	-1	271	0.338235	408	138	probable secreted protein	not required
STMMW_03191	yafV	351693	352460	-1	219	0.121094	768	93	possible hydrolase	not required
STMMW_03201	fadE	352569	355013	-1	1034	0.159509	2445	390	possible acyl-CoA dehydrogenase	not required
STMMW_03211	gmhA	355253	355831	1	13	0.0189983	579	11	phosphoheptose isomerase	required
STMMW_03221	yafJ	356044	356811	1	464	0.230469	768	177	conserved hypothetical protein	not required
STMMW_03231	yafK	356782	357522	-1	296	0.176788	741	131	putative exported protein	not required
STMMW_03241	dbh	357772	358827	1	957	0.22822	1056	241	DNA polymerase IV	not required
STMMW_03251	STMMW_03251	359046	360175	1	690	0.237168	1130	268	release factor H-coupled RctB family protein (pseudogene)	not required
STMMW_03261	prfH	360175	360789	1	140	0.097561	615	60	putative peptide chain release factor	not required
STMMW_03271	pepD	360945	362402	-1	605	0.165295	1458	241	aminoacyl-histidine dipeptidase precursor	not required
STMMW_03281	gpt	362651	363109	1	276	0.163399	459	75	xanthine-guanine phosphoribosyltransferase	not required
STMMW_03291	frsA	363198	364442	1	764	0.221687	1245	276	conserved hypothetical protein	not required
STMMW_03301	crl	364500	364901	1	416	0.343284	402	138	curlin genes transcriptional activator	not required
STMMW_03311	phoE	364952	366004	-1	759	0.251662	1053	265	outer membrane pore protein E precursor	not required
STMMW_03321	proB	366287	367390	1	926	0.109601	1104	121	glutamate 5-kinase	not required
STMMW_03331	proA	367402	368652	1	356	0.139089	1251	174	gamma-glutamyl phosphate reductase	not required
STMMW_03341	int	368858	369853	-1	406	0.175703	996	175	BTP1 integrase	not required
STMMW_03351	xis	369898	370248	-1	208	0.193732	351	68	BTP1 excisionase	not required
STMMW_03361	EaC	370259	370852	-1	500	0.289562	594	172	BTP1 predicted prophage protein	not required
STMMW_03371	EaG	370924	371208	-1	160	0.196491	285	56	BTP1 predicted prophage protein	not required
STMMW_03381	EaA	371201	372166	-1	643	0.230849	966	223	BTP1 predicted prophage protein	not required
STMMW_03391	EaD	372177	372932	-1	287	0.160053	756	121	BTP1 predicted prophage protein	not required
STMMW_03411	EaF	372932	373576	-1	210	0.148837	645	96	BTP1 predicted prophage protein	not required
STMMW_03421	EaE	373573	373983	-1	477	0.291971	411	120	BTP1 predicted prophage protein	not required
STMMW_03422	STMMW_03422	373980	374150	-1	117	0.187135	171	32	BTP1 predicted prophage protein	not required
STMMW_03431	abc2	374161	374454	-1	194	0.197279	294	58	BTP1 anti-RecBCD	not required
STMMW_03441	abc1	374501	374785	-1	190	0.308772	285	88	BTP1 anti-RecBCD	not required
STMMW_03451	erf	374785	375492	-1	1168	0.507062	708	359	BTP1 predicted prophage protein	not required
STMMW_03461	arf	375489	375632	-1	52	0.104167	144	15	BTP1 predicted prophage protein	not required
STMMW_03471	kil	375622	375810	-1	148	0.248677	189	47	BTP1 kil	not required
STMMW_03481	cIII	375791	375973	-1	156	0.300546	183	55	BTP1 regulatory protein cIII	not required
STMMW_03491	STMMW_03491	376060	376206	-1	23	0.102041	147	15	BTP1 predicted prophage protein	not required
STMMW_03501	STMMW_03501	376267	376566	-1	765	0.65	300	195	BTP1 predicted prophage protein	not required
STMMW_03511	ral	376606	376806	-1	177	0.308458	201	62	BTP1 antirestriction protein	not required
STMMW_03521	N	376885	377217	-1	166	0.252252	333	84	BTP1 antitermination protein	not required
STMMW_03522	STMMW_03522	377620	377790	1	59	0.175439	171	30	BTP1 predicted prophage protein	not required
STMMW_03531	st313td	377826	378749	-1	861	0.375541	924	347	BTP1 putative virulence associated protein	not required
STMMW_03541	cI	378838	379563	-1	83	0.0633609	726	46	BTP1 repressor protein cI	ambiguous
STMMW_03551	cro	379638	379853	1	141	0.287037	216	62	BTP1 antirepressor protein	not required
STMMW_03561	cII	379964	380245	1	160	0.230496	282	65	BTP1 transcriptioanl activator cII	not required
STMMW_03571	O	380419	381252	1	347	0.184652	834	154	BTP1 replication protein	not required
STMMW_03581	P	381249	382625	1	732	0.165577	1377	228	BTP1 replication associated protein	not required
STMMW_03582	STMMW_03582	382622	382891	1	219	0.292593	270	79	BTP1 predicted prophage protein	not required
STMMW_03601	STMMW_03601	382963	383235	1	349	0.413919	273	113	BTP1 predicted prophage protein	not required
STMMW_03602	STMMW_03602	383245	383454	1	237	0.390476	210	82	BTP1 predicted prophage protein	not required
STMMW_03611	STMMW_03611	383451	383759	1	140	0.255663	309	79	BTP1 predicted prophage protein	not required
STMMW_03621	STMMW_03621	383756	383950	1	140	0.215385	195	42	BTP1 predicted prophage protein	not required
STMMW_03631	ninB	383907	384353	1	331	0.272931	447	122	BTP1 predicted prophage protein	not required
STMMW_03641	ninE	384490	384672	1	86	0.196721	183	36	BTP1 predicted prophage protein	not required
STMMW_03651	ninF	384669	384839	1	179	0.263158	171	45	BTP1 predicted prophage protein	not required
STMMW_03661	ninG	384832	385443	1	336	0.223856	612	137	BTP1 predicted prophage protein	not required
STMMW_03671	ninY	385440	385664	1	85	0.16	225	36	BTP1 predicted prophage protein	not required
STMMW_03681	STMMW_03681	385661	385864	1	172	0.323529	204	66	BTP1 predicted prophage protein	not required
STMMW_03691	Q	386021	386539	1	422	0.192678	519	100	BTP1 antiterminator protein	not required
STMMW_03711	S	387004	387207	1	142	0.343137	204	70	BTP1 holin	not required
STMMW_03721	R	387179	387682	1	439	0.285714	504	144	BTP1 lysozyme	not required
STMMW_03731	Rz	387735	388208	1	320	0.251055	474	119	BTP1 lysis associated membrane protein	not required
STMMW_03741	rha	388358	388963	1	423	0.265677	606	161	BTP1 predicted prophage protein	not required
STMMW_03751	pid	389225	389539	-1	476	0.498413	315	157	BTP1 P22 instigator of dgo-expression	not required
STMMW_03761	STMMW_03761	389793	390035	1	325	0.399177	243	97	BTP1 predicted prophage protein	not required
STMMW_03762	STMMW_03762	390037	390216	1	141	0.372222	180	67	BTP1 hypothetical protein	not required
STMMW_03771	STMMW_03771	390240	390728	1	550	0.364008	489	178	BTP1 terminase small subunit	not required
STMMW_03781	STMMW_03781	390706	392205	1	1350	0.299333	1500	449	BTP1 terminase large subunit	not required
STMMW_03791	STMMW_03791	392205	394382	1	2891	0.382461	2178	833	BTP1 portal protein	not required
STMMW_03801	STMMW_03801	394396	395307	1	926	0.313596	912	286	BTP1 scaffolding protein	not required
STMMW_03811	STMMW_03811	395307	396599	1	1540	0.372776	1293	482	BTP1 coat protein	not required
STMMW_03821	STMMW_03821	396640	397200	1	742	0.361854	561	203	BTP1 predicted prophage protein	not required
STMMW_03831	STMMW_03831	397184	397684	1	482	0.337325	501	169	BTP1 DNA stabilization protein	not required
STMMW_03841	STMMW_03841	397677	399062	1	1644	0.336219	1386	466	BTP1 packaged DNA stabilization protein	not required
STMMW_03851	STMMW_03851	399066	399767	1	828	0.360399	702	253	BTP1 packaged DNA stabilization and needle protein	not required
STMMW_03861	STMMW_03861	399767	400222	1	384	0.282895	456	129	BTP1 head assembly protein	not required
STMMW_03871	STMMW_03871	400225	400914	1	820	0.334783	690	231	BTP1 DNA transfer protein	not required
STMMW_03881	STMMW_03881	400924	402294	1	976	0.279358	1371	383	BTP1 DNA transfer protein	not required
STMMW_03891	STMMW_03891	402294	404261	1	1124	0.226626	1968	446	BTP1 DNA tranfer protein	not required
STMMW_03901	STMMW_03901	404417	406402	1	2878	0.405841	1986	806	BTP1 tail spike protein	not required
STMMW_03911	gtrC	406442	408364	-1	865	0.25845	1923	497	BTP1Â O-antigen acetyltransferase	not required
STMMW_03921	gtrA	408436	408711	-1	251	0.427536	276	118	BTP1 bactoprenol-linked glucose transferase	not required
STMMW_03931	STMMW_03931	408985	409230	-1	138	0.223577	246	55	BTP1 predicted prophage protein	not required
STMMW_03941	STMMW_03941	409694	410494	-1	489	0.247191	801	198	putative IS3 transposase	not required
STMMW_03951	dhaF	410412	411126	1	248	0.135664	715	97	glycerol dehydratase reactivation factor large subunit (pseudogene)	not required
STMMW_03971	STMMW_03971	411236	411559	1	160	0.179012	324	58	conserved hypothetical protein	not required
STMMW_03981	STMMW_03981	411900	413138	1	386	0.162228	1239	201	putative permease/MSF transporter	not required
STMMW_03991	leuC2	413270	414691	1	580	0.184248	1422	262	3-isopropylmalate dehydratase large subunit 2 (ec 4.2.1.33) (isopropylmalate isomerase 2) (alpha-ipm isomerase 2) (ipmi 2). 3-isopropylmalate dehydratase large subunit 2 (ec 4.2.1.33) (isopropylmalate isomerase 2) (alpha-ipm isomerase 2) (ipmi 2)	not required
STMMW_04001	leuD2	414693	415319	1	108	0.076555	627	48	3-isopropylmalate dehydratase small subunit 2 (ec 4.2.1.33) (isopropylmalate isomerase 2) (alpha-ipm isomerase 2) (ipmi 2)	ambiguous
STMMW_04011	STMMW_04011	415334	416212	1	252	0.13083	879	115	putative fumarylacetoacetate (faa) hydrolase	not required
STMMW_04021	STMMW_04021	416212	417126	1	311	0.145355	915	133	putative hydrolase or acyltransferase	not required
STMMW_04031	STMMW_04031	417160	418125	1	718	0.233954	966	226	putative LysR family transcriptional regulator	not required
STMMW_04041	STMMW_04041	418070	418342	-1	272	0.274725	273	75	conserved hypothetical protein	not required
STMMW_04051	STMMW_04051	419033	419431	1	10	0.0225564	399	9	probable secreted protein	required
STMMW_04061	stbE	419478	420236	-1	375	0.247694	759	188	fimbrial chaperone protein	not required
STMMW_04071	stbD	420202	421527	-1	1182	0.337858	1326	448	putative fimbrial protein	not required
STMMW_04081	stbC	421532	424099	-1	824	0.136682	2568	351	outer membrane fimbrial usher protein	not required
STMMW_04091	stbB	424083	424844	-1	238	0.0905512	762	69	fimbrial chaperone protein	not required
STMMW_04101	stbA	424906	425442	-1	308	0.238361	537	128	probable fimbrial protein	not required
STMMW_04111	STMMW_04111	426076	426840	1	57	0.0405229	765	31	possible transmembrane regulator	required
STMMW_04121	STMMW_04121	426813	427313	1	65	0.0698603	501	35	putative periplasmic protein	ambiguous
STMMW_04131	STMMW_04131	427613	429187	1	1543	0.336508	1575	530	putative rtn protein	not required
STMMW_04141	STMMW_04141	429287	430030	1	438	0.151882	744	113	possible transmembrane regulator	not required
STMMW_04151	STMMW_04151	430003	430491	1	146	0.114519	489	56	putative exported protein	not required
STMMW_04161	STMMW_04161	430893	431417	1	33	0.0361905	525	19	possible outer membrane protein	required
STMMW_04171	STMMW_04171	431561	432202	1	58	0.05919	642	38	possible transcriptionl regulator	ambiguous
STMMW_04181	STMMW_04181	432213	432437	1	112	0.293333	225	66	probable secreted protein	not required
STMMW_04191	STMMW_04191	432495	432854	1	193	0.25	360	90	probable lipoprotein	not required
STMMW_04201	STMMW_04201	432924	434435	-1	587	0.142196	1512	215	putative outer membrane efflux lipoprotein	not required
STMMW_04211	STMMW_04211	434398	437565	-1	1353	0.174874	3168	554	putative cation efflux protein	not required
STMMW_04221	STMMW_04221	437562	438788	-1	820	0.227384	1227	279	putative cation efflux pump	not required
STMMW_04231	STMMW_04231	439065	441353	1	1193	0.184797	2289	423	putative cation transport atpase (ec 3.6.1.-)	not required
STMMW_04241	STMMW_04241	441365	441829	1	240	0.187097	465	87	Putative transcriptional regulatory protein	not required
STMMW_04251	STMMW_04251	441907	442101	1	94	0.205128	195	40	putative metal-binding transport protein	not required
STMMW_04261	STMMW_04261	442394	443647	1	442	0.14992	1254	188	putative metabolite transport protein	not required
STMMW_04271	mod	443836	445794	1	1038	0.203675	1959	399	type III restriction-modification system enzyme (StyLTI) modification methylase	not required
STMMW_04281	res	445804	448776	1	2046	0.232089	2973	690	type III restriction-modification system enzyme (StyLTI) (ec 3.1.21.5)	not required
STMMW_04291	STMMW_04291	449053	449154	1	111	0.421569	102	43	hypothetical protein	not required
STMMW_04301	STMMW_04301	449271	450674	1	629	0.190883	1404	268	probable terminal oxidase subunit I	not required
STMMW_04311	STMMW_04311	450671	451681	1	287	0.130564	1011	132	probable terminal oxidase subunit II	not required
STMMW_04321	STMMW_04321	451698	451922	1	53	0.0977778	225	22	hypothetical protein	not required
STMMW_04331	STMMW_04331	452018	453022	1	494	0.170149	1005	171	AraC-family transcriptional regulator	not required
STMMW_04341	foxA	453168	455276	1	846	0.144618	2109	305	ferrioxamine B receptor precursor	not required
STMMW_04351	yahN	455317	455949	-1	196	0.146919	633	93	RhtC-like transporter	not required
STMMW_04361	yahO	456181	456456	1	84	0.123188	276	34	probable secreted protein	not required
STMMW_04371	prpR	456592	458217	-1	678	0.182657	1626	297	propionate catabolism operon regulatory protein	not required
STMMW_04381	prpB	458482	459369	1	527	0.216216	888	192	putative carboxyvinyl-carboxyphosphonate phosphorylmutase	not required
STMMW_04391	prpC	459492	460661	1	707	0.21453	1170	251	methylcitrate synthase	not required
STMMW_04401	prpD	460701	462152	1	750	0.18595	1452	270	PrpD protein	not required
STMMW_04411	prpE	462193	464079	1	663	0.145734	1887	275	PrpE protein	not required
STMMW_04421	hemB	464183	465157	-1	23	0.0215385	975	21	delta-aminolevulinic acid dehydratase	required
STMMW_04431	yaiU	465670	468606	1	2752	0.316309	2937	929	puative autotransporter/virulence factor	not required
STMMW_04441	iprA	468692	469315	1	657	0.408654	624	255	conserved hypothetical protein	not required
STMMW_04451	ampH	469360	470490	-1	912	0.316534	1131	358	penicillin-binding protein AmpH	not required
STMMW_04461	sbmA	470966	472084	1	503	0.170688	1119	191	SbmA protein	not required
STMMW_04471	yaiW	472099	473193	1	648	0.210046	1095	230	putative lipoprotein	not required
STMMW_04481	yaiY	473231	473539	-1	135	0.177994	309	55	putative membrane protein	not required
STMMW_04491	yaiZ	473807	474022	1	125	0.222222	216	48	putative membrane protein	not required
STMMW_04501	ddlA	474048	475142	-1	481	0.159817	1095	175	D-alanine:D-alanine ligase A	not required
STMMW_04511	STMMW_04511	475220	475933	1	259	0.155462	714	111	hypothetical protein	not required
STMMW_04521	STMMW_04521	476102	477313	1	663	0.179868	1212	218	possible efflux pump	not required
STMMW_04531	yaiB	477604	477870	1	455	0.483146	267	129	conserved hypothetical protein	not required
STMMW_04532	STMMW_04532	477894	478055	-1	158	0.290123	162	47	hypothetical protein	not required
STMMW_04541	psiF	478222	478542	1	170	0.283489	321	91	phosphate starvation-inducible protein PsiF	not required
STMMW_04551	adrA	478634	479746	1	350	0.126685	1113	141	adrA protein	not required
STMMW_04561	proC	479761	480570	-1	46	0.0432099	810	35	pyrroline-5-carboxylate reductase	required
STMMW_04571	yaiI	480710	481165	1	79	0.105263	456	48	conserved hypothetical protein	not required
STMMW_04581	aroL	481350	481895	1	180	0.10989	546	60	shikimate kinase II	not required
STMMW_04591	yaiA	481922	482113	1	111	0.25	192	48	conserved hypothetical protein	not required
STMMW_04601	aroM	482364	483041	1	299	0.202065	678	137	AroM protein	not required
STMMW_04611	yaiE	483112	483396	1	133	0.175439	285	50	conserved hypothetical protein	not required
STMMW_04621	rdgC	483434	484345	-1	257	0.133772	912	122	recombination associated protein	not required
STMMW_04631	yajF	484471	485379	1	362	0.162816	909	148	hypothetical ROK-family protein	not required
STMMW_04641	araJ	485401	486573	-1	395	0.158568	1173	186	transmembrane efflux protein	not required
STMMW_04651	sbcC	486746	489886	-1	1187	0.141993	3141	446	exonuclease SbcC	not required
STMMW_04661	sbcD	489883	491085	-1	589	0.189526	1203	228	exonuclease SbcD	not required
STMMW_04671	phoB	491299	491988	1	865	0.282609	690	195	phosphate regulon transcriptional regulatory protein PhoB	not required
STMMW_04681	phoR	492058	493353	1	639	0.195988	1296	254	phosphate regulon sensor protein PhoR	not required
STMMW_04691	brnQ	493762	495081	1	759	0.220455	1320	291	branched chain amino acid transport system II carrier protein	not required
STMMW_04701	proY	495156	496526	1	764	0.226842	1371	311	proline-specific permease ProY	not required
STMMW_04711	malZ	496688	498505	1	825	0.177118	1818	322	maltodextrin glucosidase	not required
STMMW_04721	tsaA	498577	499179	-1	212	0.165837	603	100	probable peroxidase	not required
STMMW_04731	yajB	499389	499970	-1	199	0.185567	582	108	conserved hypothetical protein	not required
STMMW_04741	queA	500064	501128	1	396	0.148357	1065	158	S-adenosylmethionine:tRNA ribosyltransferase- isomerase	not required
STMMW_04751	tgt	501325	502452	1	371	0.129433	1128	146	queuine tRNA-ribosyltransferase	not required
STMMW_04761	yajC	502475	502807	1	12	0.021021	333	7	putative membrane protein	required
STMMW_04771	secD	502835	504682	1	7	0.0021645	1848	4	protein-export membrane protein SecD	required
STMMW_04781	secF	504693	505664	1	27	0.0102881	972	10	protein-export membrane protein SecF	required
STMMW_04791	STMMW_04791	505812	506177	1	159	0.166667	366	61	conserved hypothetical protein	not required
STMMW_04801	STMMW_04801	506203	506895	1	264	0.145743	693	101	putative deoR-family transcriptional regulator	not required
STMMW_04811	yajD	507065	507412	1	121	0.135057	348	47	conserved hypothetical protein	not required
STMMW_04821	STMMW_04821	507660	507986	-1	103	0.165138	327	54	conserved hypothetical protein	not required
STMMW_04831	tsx	508041	508904	-1	359	0.131944	864	114	nucleoside-specific channel-forming protein tsx precursor	not required
STMMW_04841	yajI	509204	509743	-1	293	0.174074	540	94	putative lipoprotein	not required
STMMW_04851	nrdR	509895	510344	1	97	0.108889	450	49	conserved hypothetical protein	not required
STMMW_04861	ribD	510348	511451	1	15	0.00724638	1104	8	riboflavin biosynthesis protein RibD	required
STMMW_04871	ribH	511540	512010	1	0	0	471	0	6,7-dimethyl-8-ribityllumazine synthase (riboflavin synthase beta chain)	required
STMMW_04881	nusB	512031	512450	1	4	0.0047619	420	2	N utilization substance protein B	required
STMMW_04891	thiL	512529	513506	1	7	0.00204499	978	2	thiamine-monophosphate kinase	required
STMMW_04901	pgpA	513484	513999	1	207	0.153101	516	79	phosphatidylglycerophosphatase A	not required
STMMW_04911	yajO	514103	515077	-1	406	0.161026	975	157	putative oxidoreductase	not required
STMMW_04921	dxs	515134	516996	-1	35	0.0112721	1863	21	1-deoxyxylulose-5-phosphate synthase	required
STMMW_04931	ispA	517020	517919	-1	4	0.00444444	900	4	geranyltranstransferase	required
STMMW_04941	xseB	517920	518162	-1	10	0.037037	243	9	exodeoxyribonuclease small subunit	required
STMMW_04951	thiI	518372	519820	1	389	0.130435	1449	189	thiamine biosynthesis protein ThiI	not required
STMMW_04961	phnV	519864	520661	-1	811	0.363409	798	290	probable membrane component of 2- aminoethylphosphonate transporter	not required
STMMW_04971	phnU	520664	521524	-1	646	0.300813	861	259	probable membrane component of 2- aminoethylphosphonate transporter	not required
STMMW_04981	phnT	521527	522636	-1	816	0.262162	1110	291	probable ATP-binding component of 2- aminoethylphosphonate transporter	not required
STMMW_04991	phnS	522642	523586	-1	466	0.185185	945	175	probable periplasmic binding component of 2- aminoethylphosphonate transporter	not required
STMMW_05001	phnR	523853	524572	-1	478	0.265278	720	191	probable regulator of 2-aminoethylphosphonate uptake and metabolism operon	not required
STMMW_05011	phnW	524712	525815	1	974	0.250906	1104	277	2-aminoethylphosphonate:pyruvate aminotransferase	not required
STMMW_05021	phnX	525822	526634	1	296	0.135301	813	110	phosphonoacetaldehyde phosphonohydrolase	not required
STMMW_05031	thiJ	526731	527321	-1	188	0.125212	591	74	4-methyl-5(b-hydroxyethyl)-thiazole monophosphate biosynthesis (ThiJ) protein	not required
STMMW_05041	apbA	527284	528195	-1	512	0.199561	912	182	2-dehydropantoate 2-reductase	not required
STMMW_05051	yajQ	528303	528812	1	131	0.127451	510	65	conserved hypothetical protein	not required
STMMW_05061	yajR	528859	530208	-1	357	0.127407	1350	172	hpothetical major facilitator family transport protein	not required
STMMW_05071	STMMW_05071	530451	530612	-1	157	0.339506	162	55		not required
STMMW_05081	STMMW_05081	530760	532271	1	921	0.194444	1512	294	putative exported protein	not required
STMMW_05091	STMMW_05091	532493	533776	1	576	0.194704	1284	250	conserved hypothetical protein	not required
STMMW_05101	cyoE	533858	534748	-1	238	0.171717	891	153	cytochrome o ubiquinol oxidase C subunit	not required
STMMW_05111	cyoD	534760	535089	-1	74	0.0939394	330	31	cytochrome o ubiquinol oxidase C subunit	not required
STMMW_05121	cyoC	535089	535604	-1	165	0.141473	516	73	cytochrome o ubiquinol oxidase subunit III	not required
STMMW_05131	cyoB	535693	537684	-1	801	0.185743	1992	370	cytochrome O ubiquinol oxidase subunit I	not required
STMMW_05141	cyoA	537695	538651	-1	660	0.258098	957	247	cytochrome o ubiquinol oxidase subunit II	not required
STMMW_05151	ampG	539104	540579	-1	960	0.249322	1476	368	AmpG protein	not required
STMMW_05161	yajG	540623	541255	-1	416	0.28594	633	181	putative lipoprotein	not required
STMMW_05171	bolA	541505	541822	1	158	0.248428	318	79	BolA protein	not required
STMMW_05181	tig	542169	543467	1	470	0.160123	1299	208	trigger factor	not required
STMMW_05191	clpP	543714	544337	1	0	0	624	0	ATP-dependent Clp protease proteolytic subunit	required
STMMW_05201	clpX	544589	545860	1	11	0.00628931	1272	8	ATP-dependent Clp protease ATP-binding subunit ClpX	required
STMMW_05211	lon	546046	548400	1	547	0.0369427	2355	87	Lon protease	required
STMMW_05221	hupB	548609	548881	1	215	0.296703	273	81	DNA-binding protein Hu-beta	not required
STMMW_05231	cypD	549172	551043	1	1062	0.228632	1872	428	peptidyl-prolyl cis-trans isomerase D	not required
STMMW_05241	comE1	551193	551567	1	345	0.349333	375	131	putative exported protein	not required
STMMW_05251	ybaW	551671	552069	1	338	0.283208	399	113	conserved hypothetical protein	not required
STMMW_05261	ybaX	552175	552870	-1	601	0.28592	696	199	conserved hypothetical protein	not required
STMMW_05271	ybaE	552935	554635	-1	1686	0.338624	1701	576	Putative solute-binding protein	not required
STMMW_05281	cof	554736	555554	1	940	0.336996	819	276	conserved hypothetical protein	not required
STMMW_05291	STMMW_05291	555604	556659	-1	890	0.319129	1056	337	putative lyase	not required
STMMW_05301	ybaO	556772	557230	1	467	0.350763	459	161	hypothetical transcriptional regulator	not required
STMMW_05311	mdlA	557271	559043	1	1991	0.319797	1773	567	putative ABC transporter ATP-binding membrane protein	not required
STMMW_05321	mdlB	559036	560817	1	1869	0.315937	1782	563	putative ABC transporter ATP-binding membrane protein	not required
STMMW_05331	glnK	561030	561368	1	330	0.339233	339	115	nitrogen regulatory protein P-II	not required
STMMW_05341	amtB	561400	562686	1	1215	0.286713	1287	369	probable ammonium transporter	not required
STMMW_05351	tesB	562786	563646	-1	355	0.186992	861	161	acyl-CoA thioesterase II	not required
STMMW_05361	ybaY	563861	564430	1	471	0.305263	570	174	conserved hypothetical lipoprotein	not required
STMMW_05371	ybaZ	564463	564852	-1	195	0.25641	390	100	putative methylated-DNA methyltransferase	not required
STMMW_05381	ylaB	565083	566633	-1	879	0.22695	1551	352	hypothetical 58.9 kDa protein in tesb-hha intergenic region. Contains probable N-terminal signal sequence	not required
STMMW_05391	rpmE2	566858	567118	1	106	0.172414	261	45	putative 50S ribosomal protein L31 (second copy)	not required
STMMW_05401	rpmJa	567124	567264	1	27	0.0638298	141	9	putative 50S ribosomal protein L36 (second copy)	ambiguous
STMMW_05411	ylaC	567320	567790	-1	174	0.169851	471	80	putative membrane protein	not required
STMMW_05421	maa	567907	568458	-1	629	0.382246	552	211	maltose O-acetyltransferase	not required
STMMW_05431	hha	568637	568855	-1	158	0.378995	219	83	haemolysin expression modulating protein	not required
STMMW_05441	ybaJ	568883	569257	-1	464	0.48	375	180	conserved hypothetical protein	not required
STMMW_05451	acrB	569753	572902	-1	1882	0.232698	3150	733	acriflavin resistance protein B	not required
STMMW_05461	acrA	572925	574118	-1	827	0.252931	1194	302	acriflavin resistance protein A precursor	not required
STMMW_05471	acrR	574260	574913	1	567	0.325688	654	213	potential acrAB operon repressor	not required
STMMW_05481	aefA	575032	578394	1	2332	0.267023	3363	898	integral membrane protein AefA	not required
STMMW_05491	STMMW_05491	578436	579371	-1	673	0.287393	936	269	conserved hypothetical protein	not required
STMMW_05501	ybaM	579441	579608	-1	52	0.125	168	21	conserved hypothetical protein	not required
STMMW_05511	priC	579622	580137	-1	217	0.170543	516	88	primosomal replication protein n	not required
STMMW_05521	STMMW_05521	580218	580595	1	183	0.206349	378	78	putative membrane protein	not required
STMMW_05531	apt	580748	581299	1	153	0.123188	552	68	adenine phosphoribosyltransferase	not required
STMMW_05541	dnaX	581413	583341	1	10	0.00311042	1929	6	DNA polymerase III subunits gamma and tau	required
STMMW_05551	ybaB	583363	583716	1	129	0.166667	354	59	conserved hypothetical protein	not required
STMMW_05561	recR	583716	584321	1	258	0.169967	606	103	recombination protein RecR	not required
STMMW_05571	htpG	584408	586306	1	1188	0.230648	1899	438	heat shock protein HtpG	not required
STMMW_05581	adk	586547	587191	1	1	0.00155039	645	1	adenylate kinase	required
STMMW_05591	hemH	587420	588382	1	12	0.00726895	963	7	ferrochelatase	required
STMMW_05601	aes	588379	589350	-1	1000	0.320988	972	312	acetyl esterase	not required
STMMW_05611	gsk	589503	590807	1	832	0.226054	1305	295	inosine-guanosine kinase	not required
STMMW_05621	ybaL	590856	592532	-1	724	0.183065	1677	307	putative transport protein	not required
STMMW_05631	fsr	592747	593967	-1	622	0.205569	1221	251	fosmidomycin resistance protein	not required
STMMW_05641	ushA	594140	595792	1	1357	0.30732	1653	508	UDP-sugar hydrolase	not required
STMMW_05651	ybaK	595909	596388	-1	123	0.133333	480	64	conserved hypothetical protein	not required
STMMW_05661	ybaP	596590	597384	-1	432	0.2	795	159	conserved hypothetical protein	not required
STMMW_05671	STMMW_05671	597470	598297	-1	275	0.128019	828	106	probable secreted protein	not required
STMMW_05681	copA	598451	600952	-1	1976	0.271783	2502	680	copper-transporting ATPase	not required
STMMW_05691	cueR	601062	601478	1	171	0.158273	417	66	copper efflux regulator	not required
STMMW_05701	ybbJ	601479	601931	-1	360	0.262693	453	119	putative membrane protein	not required
STMMW_05711	ybbK	601928	602845	-1	568	0.212418	918	195	putative membrane protein	not required
STMMW_05721	ybbL	602992	603669	1	937	0.457227	678	310	putative ABC transporter ATP-binding protein	not required
STMMW_05731	ybbM	603656	604435	1	599	0.301282	780	235	putative membrane protein	not required
STMMW_05741	ybbN	604521	605375	-1	729	0.31462	855	269	thioredoxin-like protein	not required
STMMW_05751	ybbO	605435	606205	-1	554	0.24773	771	191	hypothetical oxidoreductase	not required
STMMW_05761	tesA	606360	606974	-1	392	0.282927	615	174	acyl-coA thioesterase I	not required
STMMW_05771	ybbA	606945	607631	1	675	0.280932	687	193	hypothetical ABC transporter ATP-binding protein	not required
STMMW_05781	ybbP	607628	610042	1	1289	0.210352	2415	508	putative membrane protein	not required
STMMW_05791	STMMW_05791	610228	611361	1	565	0.19224	1134	218	outer membrane protein	not required
STMMW_05801	sfbA	611618	612448	1	366	0.178099	831	148	lipoprotein	not required
STMMW_05811	sfbB	612485	613501	1	516	0.204523	1017	208	ABC transporter ATP-binding protein	not required
STMMW_05821	sfbC	613494	614153	1	332	0.212121	660	140	ABC transporter integral membrane protein	not required
STMMW_05831	ybbB	614192	615286	-1	399	0.146119	1095	160	hypothetical ATP-binding protein	not required
STMMW_05841	ybbS	615356	616282	-1	329	0.158576	927	147	hypothetical lysR-family transcriptional regulator	not required
STMMW_05851	allA	616509	616991	1	109	0.113872	483	55	ureidoglycolate hydrolase	not required
STMMW_05861	allR	617070	617888	1	307	0.13431	819	110	negative regulator of allantoin and glyoxylate utilization operons	not required
STMMW_05871	gcl	617973	619754	1	1040	0.160494	1782	286	glyoxylate carboligase	not required
STMMW_05881	gip	619767	620543	1	389	0.191763	777	149	glyoxylate-induced protein	not required
STMMW_05891	garRa	620644	621522	1	696	0.303754	879	267	2-hydroxy-3-oxopropionate reductase	not required
STMMW_05901	STMMW_05901	621579	622835	1	874	0.275259	1257	346	putative permease	not required
STMMW_05911	allP	622931	623965	1	363	0.161353	1035	167		not required
STMMW_05921	ybbY	624189	625487	1	968	0.283295	1299	368	putative permease protein	not required
STMMW_05931	glxK	625510	626658	1	488	0.173194	1149	199	glycerate kinase 1	not required
STMMW_05941	ylbA	626738	627523	-1	811	0.370229	786	291	putative glyoxylate utilization	not required
STMMW_05951	allC	627534	628769	-1	634	0.175566	1236	217	allantoate amidohydrolase	not required
STMMW_05961	allD	628791	629840	-1	683	0.242857	1050	255	ureidoglycolate dehydrogenase	not required
STMMW_05971	fdrA	630171	631835	1	583	0.162763	1665	271	putative acyl-CoA synthetase, involved in protein transport	not required
STMMW_05981	ylbE	631845	633104	1	595	0.163492	1260	206	conserved hypothetical protein	not required
STMMW_05991	ylbF	633116	633925	1	534	0.25679	810	208	conserved hypothetical protein	not required
STMMW_06001	arcC	633929	634822	1	530	0.213647	894	191	carbamate kinase	not required
STMMW_06011	purK	634863	635930	-1	518	0.197566	1068	211	phosphoribosylaminoimidazole carboxylase ATPase subunit	not required
STMMW_06021	purE	635927	636436	-1	194	0.158824	510	81	phosphoribosylaminoimidazole carboxylase catalytic subunit	not required
STMMW_06031	lpxH	636554	637276	-1	11	0.011065	723	8	conserved hypothetical protein	required
STMMW_06041	ppiB	637279	637773	-1	2	0.0040404	495	2	peptidyl-prolyl cis-trans isomerase B	required
STMMW_06051	cysS	637946	639331	1	849	0.246753	1386	342	cysteinyl-tRNA synthetase	not required
STMMW_06061	STMMW_06061	639375	640199	-1	375	0.17697	825	146	putative exported outer membrane protein	not required
STMMW_06071	STMMW_06071	640196	640633	-1	272	0.221461	438	97	putative exported protein	not required
STMMW_06081	ybcI	640626	641171	-1	233	0.173993	546	95	putative membrane protein	not required
STMMW_06091	ybcJ	641299	641511	-1	124	0.244131	213	52	conserved hypothetical protein	not required
STMMW_06101	folD	641513	642379	-1	13	0.011534	867	10	FolD bifunctional protein [includes: methylenetetrahydrofolate dehydrogenase	required
STMMW_06111	fimA	642926	643483	1	639	0.376344	558	210	type-1 fimbrial protein, a chain precursor	not required
STMMW_06121	fimI	643559	644092	1	342	0.215356	534	115	major pilin protein	not required
STMMW_06131	fimC	644136	644828	1	531	0.320346	693	222	fimbrial chaperone protein	not required
STMMW_06141	fimD	644859	647471	1	1631	0.22235	2613	581	outer membrane usher protein FimD precursor	not required
STMMW_06151	fimH	647486	648493	1	447	0.214286	1008	216	FimH protein precursor	not required
STMMW_06161	fimF	648503	649021	1	289	0.198459	519	103	putative fimbrial protein	not required
STMMW_06171	fimZ	649067	649699	-1	164	0.0789889	633	50	probable transcriptional regulator (FimXZ protein)	not required
STMMW_06181	fimY	650303	651025	-1	846	0.426003	723	308	fimbriae Y protein	not required
STMMW_06191	STMMW_06191	651044	651355	-1	144	0.201923	312	63	hypothetical protein	not required
STMMW_06201	fimW	651517	652113	-1	258	0.259631	597	155	fimbriae w protein	not required
STMMW_06211	STMMW_06211	652585	652875	-1	198	0.285223	291	83		not required
STMMW_06221	STMMW_06221	653010	653228	-1	518	0.319635	219	70	transposase	not required
STMMW_06231	STMMW_06231	653615	655267	-1	221	0.0798548	1653	132		not required
STMMW_06241	gtrBa	655248	656174	-1	595	0.280475	927	260	bactoprenol glucosyl transferase	not required
STMMW_06251	gtrAa	656171	656533	-1	435	0.37741	363	137	bactoprenol-linked glucose translocase	not required
STMMW_06261	STMMW_06261	657401	657730	-1	350	0.478788	330	158		not required
STMMW_06271	cusA	657779	658018	1	84	0.120833	240	29		not required
STMMW_06281	ykgD	658069	658923	-1	646	0.224561	855	192	hypothetical araC-family transcriptional regulator	not required
STMMW_06291	ykgC	659139	660464	1	825	0.196833	1326	261	probable pyridine nucleotide-disulfide oxidoreductase	not required
STMMW_06301	STMMW_06301	660621	660857	1	90	0.21519	237	51	hypothetical secreted protein	not required
STMMW_06311	ykgB	660870	661430	1	534	0.402852	561	226	putative membrane protein	not required
STMMW_06321	STMMW_06321	661509	662684	-1	366	0.135204	1176	159	conserved hypothetical protein	not required
STMMW_06331	pheP	663010	664404	1	631	0.162007	1395	226	phenylalanine-specific permease	not required
STMMW_06341	ybdG	664446	665693	-1	1370	0.379006	1248	473	putative membrane protein	not required
STMMW_06351	apeE	666004	667974	1	1247	0.241502	1971	476	outer membrane esterase	not required
STMMW_06361	STMMW_06361	668141	670870	1	1566	0.20293	2730	554	similar to lmo0785 protein (sigma 54-associated activator)	not required
STMMW_06371	STMMW_06371	670998	671984	-1	627	0.253293	987	250	similar to a putative phospohtase isomerase	not required
STMMW_06381	STMMW_06381	672051	673094	-1	476	0.218391	1044	228	Putative GTP Binding protein	not required
STMMW_06391	STMMW_06391	673127	673981	-1	335	0.17076	855	146	putative mannose specific permease	not required
STMMW_06401	STMMW_06401	673984	674658	-1	284	0.155556	675	105	putative mannose specific permease	not required
STMMW_06411	STMMW_06411	674742	675212	-1	158	0.161359	471	76	putative mannose specific permease	not required
STMMW_06421	STMMW_06421	675190	675639	-1	161	0.142222	450	64	putative protein	not required
STMMW_06431	nfnB	675839	676492	-1	354	0.223242	654	146	oxygen-insensitive NAD(P)H nitroreductase	not required
STMMW_06441	ybdF	676589	676957	-1	279	0.252033	369	93	conserved hypothetical protein	not required
STMMW_06451	ramR	676957	677538	-1	315	0.221649	582	129	putative TetR-family transcriptional regulator	not required
STMMW_06461	ramA	677827	678168	1	184	0.201754	342	69	transcriptional activator RamA	not required
STMMW_06472	ybdJ	678174	678422	-1	116	0.124498	249	31	putative membrane protein	not required
STMMW_06481	ybdK	678489	679607	-1	502	0.193923	1119	217	conserved hypothetical protein	not required
STMMW_06491	entD	679619	680323	-1	280	0.171631	705	121	enterobactin synthetase component D	not required
STMMW_06501	fepA	680369	682624	-1	1403	0.20922	2256	472	ferrienterobactin receptor precursor	not required
STMMW_06511	fes	682813	684027	1	465	0.120165	1215	146	enterochelin esterase	not required
STMMW_06521	ybdZ	684058	684276	1	78	0.178082	219	39	conserved hypothetical protein	not required
STMMW_06531	entF	684273	688157	1	1004	0.11094	3885	431	enterobactin synthetase component F	not required
STMMW_06541	fepE	688407	689543	1	870	0.260334	1137	296	ferric enterobactin transport protein	not required
STMMW_06551	fepC	689596	690390	-1	17	0.0201258	795	16	ferric enterobactin transport ATP-binding protein FepC	required
STMMW_06561	fepG	690387	691376	-1	19	0.0121212	990	12	ferric enterobactin transport protein FepG	required
STMMW_06571	fepD	691376	692383	-1	18	0.014881	1008	15	ferric enterobactin transport protein FepD	required
STMMW_06581	ybdA	692494	693738	1	584	0.17751	1245	221	hypothetical membrane protein p43	not required
STMMW_06591	fepB	693801	694757	-1	18	0.0177638	957	17	ferrienterobactin-binding periplasmic protein precursor	required
STMMW_06601	entC	695066	696241	1	502	0.146259	1176	172	isochorismate synthase EntC	not required
STMMW_06611	entE	696251	697861	1	553	0.143389	1611	231	2,3-dihydroxybenzoate-AMP ligase	not required
STMMW_06621	entB	697875	698732	1	411	0.177156	858	152	isochorismatase	not required
STMMW_06631	entA	698732	699487	1	273	0.164021	756	124	2,3-dihydro-2,3-dihydroxybenzoate dehydrogenase	not required
STMMW_06641	ybdB	699490	699903	1	267	0.195652	414	81	conserved hypothetical protein	not required
STMMW_06651	cstAa	700085	702190	1	1286	0.22982	2106	484	carbon starvation protein A	not required
STMMW_06661	ybdD	702254	702451	1	87	0.186869	198	37	conserved hypothetical protein	not required
STMMW_06671	ybdH	702487	703575	-1	754	0.243343	1089	265	putative oxidoreductase	not required
STMMW_06681	ybdL	703702	704862	1	408	0.161068	1161	187	putative aminotransferase	not required
STMMW_06691	ybdM	704863	705480	-1	291	0.18123	618	112	conserved hypothetical protein	not required
STMMW_06701	ybdN	705453	706688	-1	719	0.194175	1236	240	conserved hypothetical protein	not required
STMMW_06711	ybdO	706854	707756	-1	196	0.149502	903	135	putative LysR-family transcriptional regulator	not required
STMMW_06721	dsbG	708073	708819	-1	260	0.195448	747	146	thiol:disulfide interchange protein DsbG precursor	not required
STMMW_06731	ahpC	709260	709823	1	258	0.148936	564	84	alkyl hydroperoxide reductase C22 protein	not required
STMMW_06741	ahpF	710065	711630	1	917	0.208174	1566	326	alkyl hydroperoxide reductase F52A protein (subunit F)	not required
STMMW_06751	STMMW_06751	711962	712522	1	187	0.187166	561	105	conserved hypothetical protein	not required
STMMW_06761	STMMW_06761	712515	714794	1	1530	0.259649	2280	592	molybdopterin-containing oxidoreductase catalytic subunit	not required
STMMW_06771	STMMW_06771	714791	715348	1	565	0.28853	558	161	molybdopterin-containing oxidoreductase iron- sulfur subunit	not required
STMMW_06781	STMMW_06781	715348	716115	1	645	0.27474	768	211	molybdopterin-containing oxidoreductase membrane anchor subunit	not required
STMMW_06791	ybdQ	716183	716611	-1	522	0.412587	429	177	conserved hypothetical protein	not required
STMMW_06801	ybdR	716834	718072	1	757	0.201776	1239	250	hypothetical zinc-dependant alcohol dehydrogenase	not required
STMMW_06811	rnk	718155	718565	-1	274	0.22871	411	94	regulator of nucleoside diphosphate kinase	not required
STMMW_06821	rna	718800	719606	-1	457	0.231722	807	187	ribonuclease I precursor	not required
STMMW_06831	citT	719716	721179	-1	1344	0.331967	1464	486	citrate carrier	not required
STMMW_06841	citG	721217	722113	-1	679	0.246377	897	221	citg protein	not required
STMMW_06851	citX	722085	722636	-1	539	0.304348	552	168	probable apo-citrate lyase phosphoribosyl- dephospho-coa transferase (ec 2.7.7.61) (holo-acp synthase) (holo-citrate lyase synthase) (apo-acp nucleodityltransferase)	not required
STMMW_06861	citF	722640	724169	-1	1153	0.252288	1530	386	citrate lyase alpha chain	not required
STMMW_06871	citE	724179	725087	-1	408	0.182618	909	166	citrate lyase beta chain	not required
STMMW_06881	citD	725084	725380	-1	245	0.225589	297	67	citrate lyase acyl carrier protein	not required
STMMW_06891	citC	725377	726453	-1	1039	0.232126	1077	250	[citrate (PRO-3S)-lyase] ligase	not required
STMMW_06901	citA	726838	728499	1	1066	0.245487	1662	408	twp component sensor kinase DpiB	not required
STMMW_06911	citB	728468	729148	1	563	0.325991	681	222	transcriptional regulator	not required
STMMW_06921	dcuC	729202	730455	-1	999	0.240032	1254	301	C4-dicarboxylate anaerobic carrier	not required
STMMW_06931	pagP	730966	731538	1	560	0.418848	573	240	antimicrobial peptide resistance and lipid A acylation protein	not required
STMMW_06941	cspE	731726	731935	1	58	0.128571	210	27	cold shock-like protein cspE	not required
STMMW_06951	ccrB	731993	732376	-1	29	0.046875	384	18	putative membrane protein	required
STMMW_06961	ybeM	732467	733255	1	197	0.120406	789	95	possible hydrolase	not required
STMMW_06971	tatE	733384	733587	1	77	0.147059	204	30	Sec-independent protein translocase protein	not required
STMMW_06981	lipA	733673	734638	-1	12	0.00828157	966	8	lipoic acid synthetase	required
STMMW_06991	ybeF	734844	735797	-1	966	0.300839	954	287	LysR-family transcriptional regulator	not required
STMMW_07001	lipB	736099	736674	-1	32	0.0451389	576	26	lipoate-protein ligase B (lipoate biosynthesis protein B)	required
STMMW_07011	ybeD	736840	737103	-1	23	0.0681818	264	18	conserved hypothetical protein	ambiguous
STMMW_07021	dacA	737212	738423	-1	434	0.160891	1212	195	D-alanine carboxypeptidase	not required
STMMW_07031	rlpA	738563	739708	-1	706	0.24171	1146	277	rare lipoprotein A precursor	not required
STMMW_07041	mrdB	739719	740831	-1	14	0.0107817	1113	12	rod shape-determining protein RodA	required
STMMW_07051	mrdA	740834	742735	-1	21	0.00946372	1902	18	penicillin-binding protein	required
STMMW_07061	ybeA	742766	743233	-1	158	0.211538	468	99	conserved hypothetical protein	not required
STMMW_07071	ybeB	743237	743554	-1	124	0.204403	318	65	conserved hypothetical protein	not required
STMMW_07081	cobC	743883	744491	-1	720	0.220033	609	134	alpha-ribazole-5'-phosphate phosphatase	not required
STMMW_07091	cobD	744588	745682	1	712	0.224658	1095	246	putative aminotransferase CobD	not required
STMMW_07101	nadD	745657	746298	-1	78	0.0373832	642	24	conserved hypothetical protein	required
STMMW_07111	holA	746300	747331	-1	50	0.0251938	1032	26	DNA polymerase III, delta subunit	required
STMMW_07121	rlpB	747331	747921	-1	5	0.00846024	591	5	rare lipoprotein B precursor	required
STMMW_07131	leuS	747936	750518	-1	73	0.00425861	2583	11	leucyl-tRNA synthetase	required
STMMW_07141	STMMW_07141	750755	751096	1	107	0.108187	342	37	putative hydrolase N-terminus	not required
STMMW_07151	STMMW_07151	751113	752285	1	1151	0.302643	1173	355	putative hydrolase C-terminus	not required
STMMW_07161	STMMW_07161	752404	753288	1	930	0.414689	885	367	probable permease	not required
STMMW_07171	STMMW_07171	753356	755284	1	1918	0.33437	1929	645	putative sigma-54 dependent transcriptional regulator	not required
STMMW_07181	ybeL	755377	755850	1	239	0.191983	474	91	conserved hypothetical protein	not required
STMMW_07191	ybeQ	755889	756884	-1	1764	0.412651	996	411	conserved hypothetical protein	not required
STMMW_07201	ybeR	757009	757716	1	645	0.351695	708	249	conserved hypothetical protein	not required
STMMW_07211	ybeS	757713	759146	1	1384	0.331939	1434	476	putative membrane protein	not required
STMMW_07221	ybeU	759158	759851	1	714	0.345821	694	240	putative conserved hypothetical protein (pseudogene)	not required
STMMW_07231	ybeV	759851	761323	1	1336	0.311609	1473	459		not required
STMMW_07241	hscC	761345	763024	-1	1290	0.252381	1680	424	chaperone heat shock protein	not required
STMMW_07251	STMMW_07251	763100	764338	-1	508	0.183212	1239	227	putative conserved hypothetical protein	not required
STMMW_07261	rihA	764370	765305	-1	458	0.183761	936	172	probable nucleoside hydrolase	not required
STMMW_07271	gltL	765422	766147	-1	634	0.293388	726	213	glutamate/aspartate transport ATP-binding protein GltL	not required
STMMW_07281	gltK	766147	766821	-1	431	0.231111	675	156	glutamate/aspartate transport system permease protein GltK	not required
STMMW_07291	gltJ	766821	767561	-1	504	0.282051	741	209	glutamate/aspartate transport system permease protein GltJ	not required
STMMW_07301	gltI	767721	768647	-1	506	0.212513	927	197	ABC transporter periplasmic binding protein (glutamate/aspartate?)	not required
STMMW_07311	lnt	768984	770522	-1	28	0.00974659	1539	15	apolipoprotein N-acyltransferase	required
STMMW_07321	ybeX	770542	771420	-1	273	0.162685	879	143	haemolysin-related protein	not required
STMMW_07331	ybeY	771578	772051	-1	71	0.0759494	474	36	conserved hypothetical protein	ambiguous
STMMW_07341	phoL	772048	773133	-1	236	0.112339	1086	122	PhoH-like ATP-binding protein	not required
STMMW_07351	miaB	773299	774723	-1	988	0.243509	1425	347	MiaB protein (putative tRNA-thiotransferase (or tRNA-methylthiotransferase))	not required
STMMW_07361	ubiF	774867	776042	1	16	0.00595238	1176	7	putative monooxygenase	required
STMMW_07371	STMMW_07371	776109	776684	-1	255	0.145833	576	84	putative exported protein	not required
STMMW_07381	asnB	777751	779415	-1	1277	0.264865	1665	441	asparagine synthetase B	not required
STMMW_07391	nagD	779705	780457	-1	465	0.232404	753	175	NagD protein	not required
STMMW_07401	nagC	780504	781724	-1	530	0.191646	1221	234	N-acetylglucosamine repressor	not required
STMMW_07411	nagA	781729	782883	-1	188	0.108225	1155	125	N-acetylglucosamine-6-phosphate deacetylase	not required
STMMW_07421	nagB	782943	783743	-1	540	0.220974	801	177	Glucosamine-6-phosphate deaminase	not required
STMMW_07431	nagE	784070	786022	1	1319	0.228879	1953	447	PTS system, N-acetylglucosamine-specific IIABC component	not required
STMMW_07441	glnS	786233	787900	1	20	0.00539568	1668	9	glutaminyl-tRNA synthetase	required
STMMW_07451	ybfM	788346	789752	1	1189	0.32978	1407	464	putative outer membrane protein	not required
STMMW_07461	ybfN	789802	790134	1	302	0.348348	333	116	putative lipoprotein	not required
STMMW_07471	STMMW_07471	790183	791487	-1	1163	0.30728	1305	401	citrate-proton symporter	not required
STMMW_07481	STMMW_07481	791538	792677	-1	967	0.264912	1140	302	citrate utilization protein B	not required
STMMW_07491	STMMW_07491	792664	794067	-1	1008	0.248575	1404	349	conserved hypothetical protein	not required
STMMW_07501	STMMW_07501	794165	795091	-1	663	0.256742	927	238	LysR-family transcriptional regulator	not required
STMMW_07511	fur	795206	795658	-1	24	0.0507726	453	23	ferric uptake regulation protein	required
STMMW_07521	fldA	795940	796470	-1	24	0.0263653	531	14	flavodoxin 1	required
STMMW_07531	ybfE	796633	796914	-1	113	0.230496	282	65	conserved hypothetical protein	not required
STMMW_07541	ybfF	797048	797818	-1	303	0.158236	771	122	putative esterase/lipase YbfF	not required
STMMW_07551	seqA	798003	798545	1	293	0.178637	543	97	seqA protein	not required
STMMW_07561	pgm	798615	800210	1	83	0.0419799	1596	67	phosphoglucomutase	required
STMMW_07571	STMMW_07571	800325	800810	-1	246	0.183128	486	89	possible 5-nitroimidazole antibiotic resistance	not required
STMMW_07581	potE	800875	802194	-1	1116	0.315152	1320	416	putrescine-ornithine antiporter	not required
STMMW_07591	speF	802191	804389	-1	1995	0.267394	2199	588	ornithine decarboxylase, inducible (ec 4.1.1.17)	not required
STMMW_07601	kdpE	805151	805828	-1	337	0.19764	678	134	KDP operon transcriptional regulatory protein	not required
STMMW_07611	kdpD	805825	808509	-1	2085	0.26406	2685	709	sensor protein KdpD	not required
STMMW_07621	kdpC	808506	809090	-1	609	0.331624	585	194	potassium-transporting ATPase C chain	not required
STMMW_07631	kdpB	809099	811147	-1	2034	0.329917	2049	676	potassium-transporting ATPase B chain	not required
STMMW_07641	kdpA	811168	812847	-1	1780	0.329762	1680	554	potassium-transporting ATPase A chain	not required
STMMW_07642	kdpF	812847	812936	-1	58	0.311111	90	28	conserved sORF	not required
STMMW_07651	ybfA	813273	813479	1	148	0.270531	207	56	putative exported protein	not required
STMMW_07661	phrB	813590	815011	1	876	0.24121	1422	343	deoxyribodipyrimidine photolyase	not required
STMMW_07671	ybgH	815050	816531	-1	1204	0.286775	1482	425	PTR2-family transport protein	not required
STMMW_07681	ybgI	816860	817603	1	607	0.284946	744	212	conserved hypothetical protein	not required
STMMW_07691	ybgJ	817619	818275	1	351	0.226788	657	149	conserved hypothetical protein	not required
STMMW_07701	ybgK	818269	819201	1	573	0.234727	933	219	conserved hypothetical protein	not required
STMMW_07711	ybgL	819191	819925	1	316	0.155102	735	114	conserved hypothetical protein	not required
STMMW_07721	STMMW_07721	820249	820380	1	106	0.348485	132	46	putative protein	not required
STMMW_07731	fimB	820440	821006	1	339	0.248677	567	141	putative type 1 fimbriae regulatory protein	not required
STMMW_07741	STMMW_07741	821466	821801	1	246	0.214286	336	72	putative protein	not required
STMMW_07751	STMMW_07751	821803	822543	1	344	0.136302	741	101	putative transport protein	not required
STMMW_07761	STMMW_07761	822829	823980	1	43	0.0217014	1152	25	putative UDP-galactopyranose mutase	required
STMMW_07771	STMMW_07771	823977	824873	1	4	0.00445931	897	4	putative glycosyl transferase	required
STMMW_07781	STMMW_07781	824886	826019	1	21	0.010582	1134	12	galactosyltransferase	required
STMMW_07791	STMMW_07791	826148	826918	1	123	0.0570687	771	44	O-antigen export system, permease protein	ambiguous
STMMW_07801	STMMW_07801	826922	827632	1	7	0.00843882	711	6	ABC transporter domain protein	required
STMMW_07811	STMMW_07811	827726	829504	1	15	0.00449691	1779	8	putative glycosyltransferase, cell wall biogenesis	required
STMMW_07821	STMMW_07821	829697	830530	1	5	0.0059952	834	5	putative glycosyltransferase, cell wall biogenesis	required
STMMW_07831	STMMW_07831	830588	832482	1	157	0.0437995	1895	83	putative glycosyl transferase (pseudogene)	required
STMMW_07841	STMMW_07841	832550	832687	1	158	0.550725	138	76	conserved hypothetical cytoplasmic protein	not required
STMMW_07851	nei	832736	833527	1	322	0.184343	792	146	endonuclease VIII, DNA N-glycosylase with an AP lyase activity	not required
STMMW_07861	abrB	833582	834544	-1	517	0.223261	963	215	putative membrane protein	not required
STMMW_07871	gltA	834765	836048	-1	557	0.191589	1284	246	citrate synthase	not required
STMMW_07881	STMMW_07881	836023	836394	1	228	0.260753	372	97	putative exported protein	not required
STMMW_07891	sdhC	836803	837192	1	76	0.123077	390	48	succinate dehydrogenase cytochrome b-556 subunit	not required
STMMW_07901	sdhD	837186	837533	1	169	0.206897	348	72	succinate dehydrogenase hydrophobic membrane anchor protein	not required
STMMW_07911	sdhA	837533	839299	1	585	0.155631	1767	275	succinate dehydrogenase flavoprotein subunit	not required
STMMW_07921	sdhB	839313	840032	1	133	0.102778	720	74	succinate dehydrogenase iron-sulfur protein	not required
STMMW_07931	sucA	840556	843357	1	140	0.0292648	2802	82	2-oxoglutarate dehydrogenase E1 component	required
STMMW_07941	sucB	843372	844580	1	39	0.0223325	1209	27	dihydrolipoamide succinyltransferase component (E2)	required
STMMW_07951	sucC	844722	845888	1	164	0.0694087	1167	81	succinyl-CoA synthetase beta chain	ambiguous
STMMW_07961	sucD	845888	846757	1	114	0.0758621	870	66	succinyl-CoA synthetase alpha chain	ambiguous
STMMW_07971	cydA	848340	849908	1	15	0.00509879	1569	8	cytochrome D ubiquinol oxidase subunit I	required
STMMW_07981	cydB	849924	851063	1	11	0.00877193	1140	10	cytochrome D ubiquinol oxidase subunit II	required
STMMW_07991	ybgT	851078	851191	1	12	0.0526316	114	6	putative membrane protein	ambiguous
STMMW_08001	ybgE	851328	851609	1	136	0.22695	282	64	putative membrane protein	not required
STMMW_08011	ybgC	851838	852242	1	263	0.232099	405	94	conserved hypothetical protein	not required
STMMW_08021	tolQ	852239	852931	1	37	0.034632	693	24	TolQ protein	required
STMMW_08031	tolR	852935	853363	1	36	0.048951	429	21	tolR protein	required
STMMW_08041	tolA	853428	854651	1	44	0.0302288	1224	37	TolA protein	required
STMMW_08051	tolB	854775	856067	1	62	0.0425367	1293	55	tolB protein precursor	required
STMMW_08061	pal	856102	856626	1	42	0.0361905	525	19	peptidoglycan-associated lipoprotein precursor	required
STMMW_08071	ybgF	856636	857424	1	472	0.234474	789	185	putative exported protein	not required
STMMW_08081	nadA	858889	859932	1	653	0.242337	1044	253	quinolinate synthetase A protein	not required
STMMW_08091	pnuC	859957	860676	1	408	0.2	720	144	pnuC protein	not required
STMMW_08101	ybgR	860673	861611	-1	601	0.227902	939	214	probable cation transport protein	not required
STMMW_08111	ybgS	861721	862107	-1	368	0.390181	387	151	putative exported protein	not required
STMMW_08121	aroG	862427	863479	1	470	0.162393	1053	171	phospho-2-dehydro-3-deoxyheptonate aldolase (DAHP synthetase) phenylalanine repressible	not required
STMMW_08131	STMMW_08131	863573	864118	-1	241	0.181319	546	99	putative hydro-lyase	not required
STMMW_08141	STMMW_08141	864133	864978	-1	191	0.0933806	846	79	putative hydro-lyase	not required
STMMW_08151	STMMW_08151	865147	865998	1	36	0.0187793	852	16	LysR-family transcriptional regulator	required
STMMW_08161	STMMW_08161	865999	866982	-1	139	0.0670732	984	66	LysR-family transcriptional regulator	ambiguous
STMMW_08171	STMMW_08171	867205	868473	1	19	0.0118203	1269	15	putative cation transporter	required
STMMW_08181	dcoC	868523	868768	1	292	0.455285	246	112	oxaloacetate decarboxylase gamma chain (ec 4.1.1.3)	not required
STMMW_08191	dcoA	868784	870559	1	2296	0.398086	1776	707	oxaloacetate decarboxylase alpha chain (ec 4.1.1.3)	not required
STMMW_08201	dcoB	870572	871873	1	2147	0.448541	1302	584	oxaloacetate decarboxylase beta chain (ec 4.1.1.3)	not required
STMMW_08211	STMMW_08211	871992	872690	1	374	0.190272	699	133	conserved hypothetical protein	not required
STMMW_08221	STMMW_08221	873070	874149	1	748	0.280556	1080	303	ABC transporter permease (FecCD_family)	not required
STMMW_08231	STMMW_08231	874149	874925	1	493	0.212355	777	165	ABC transporter ATP-binding protein	not required
STMMW_08241	gpmA	875016	875768	-1	335	0.188579	753	142	phosphoglycerate mutase 1	not required
STMMW_08251	galM	875992	877032	-1	694	0.255524	1041	266	aldose 1-epimerase (mutarotase)	not required
STMMW_08261	galK	877026	878174	-1	710	0.233246	1149	268	galactokinase	not required
STMMW_08271	galT	878177	879223	-1	455	0.156638	1047	164	galactose-1-phosphate uridylyltransferase	not required
STMMW_08281	galE	879234	880250	-1	325	0.169125	1017	172	UDP-glucose 4-epimerase	not required
STMMW_08291	STMMW_08291	880473	881381	-1	645	0.214521	909	195	putative membrane protein	not required
STMMW_08301	modF	881552	883027	-1	1096	0.273035	1476	403	putative molybdenum transport ATP-binding protein ModF (photorepair protein PhrA)	not required
STMMW_08311	modE	883095	883883	-1	549	0.196451	789	155	putative molybdenum transport protein ModE	not required
STMMW_08321	ybhT	883910	884161	1	124	0.174603	252	44	putative membrane protein	not required
STMMW_08331	modA	884328	885101	1	433	0.218346	774	169	molybdate-binding periplasmic protein precursor	not required
STMMW_08341	modB	885101	885790	1	435	0.242029	690	167	molybdenum transport system permease protein ModB	not required
STMMW_08351	modC	885793	886851	1	756	0.248347	1059	263	molybdenum transport ATP-binding protein ModC	not required
STMMW_08361	ybhA	886852	887670	-1	579	0.247863	819	203	conserved hypothetical protein	not required
STMMW_08371	ybhE	887834	888829	1	355	0.170683	996	170	conserved hypothetical protein	not required
STMMW_08381	ybhC	888973	890256	-1	943	0.286604	1284	368	possible pectinesterase precursor	not required
STMMW_08391	hutI	890494	891717	1	909	0.257353	1224	315	imidazolonepropionase	not required
STMMW_08401	hutG	891714	892655	1	626	0.229299	942	216	formiminoglutamase	not required
STMMW_08411	hutC	892748	893425	1	625	0.289086	678	196	histidine utilization repressor	not required
STMMW_08421	hutU	893622	895307	1	1400	0.266311	1686	449	urocanate hydratase	not required
STMMW_08431	hutH	895309	896829	1	1479	0.305062	1521	464	histidine ammonia-lyase	not required
STMMW_08441	ybhB	896914	897390	-1	595	0.402516	477	192	conserved hypothetical protein	not required
STMMW_08451	bioA	897448	898737	-1	1237	0.316279	1290	408	adenosylmethionine-8-amino-7-oxononanoate aminotransferase	not required
STMMW_08461	bioB	898824	899864	1	921	0.333333	1041	347	biotin synthetase	not required
STMMW_08471	bioF	899861	901018	1	958	0.243523	1158	282	8-amino-7-oxononanoate synthase	not required
STMMW_08481	bioC	901002	901757	1	581	0.271164	756	205	biotin synthesis protein BioC	not required
STMMW_08491	bioDa	901750	902436	1	542	0.232897	687	160	dethiobiotin synthetase	not required
STMMW_08501	uvrB	903087	905108	1	893	0.157765	2022	319	excision nuclease ABC subunit B	not required
STMMW_08511	STMMW_08511	905417	905590	1	105	0.166667	174	29	putative cytoplasmic protein	not required
STMMW_08521	slrP	905598	907895	1	2366	0.415144	2298	954	leucine rich repeat	not required
STMMW_08531	ybhK	907987	908895	-1	404	0.205721	909	187	conserved hypothetical protein	not required
STMMW_08541	moaA	909292	910281	1	503	0.169697	990	168	molybdenum cofactor biosynthesis protein A	not required
STMMW_08551	moaB	910303	910815	1	251	0.196881	513	101	molybdenum cofactor biosynthesis protein B	not required
STMMW_08561	moaC	910818	911303	1	272	0.183128	486	89	molybdenum cofactor biosynthesis protein C	not required
STMMW_08571	moaD	911290	911541	1	91	0.130952	252	33	molybdopterin converting factor, subunit 1	not required
STMMW_08581	moaE	911543	911995	1	145	0.12362	453	56	molybdopterin converting factor, subunit 2	not required
STMMW_08591	ybhL	912043	912747	1	1025	0.334752	705	236	putative membrane protein	not required
STMMW_08601	ybhM	912894	913601	1	88	0.0805085	708	57	putative membrane protein	not required
STMMW_08611	STMMW_08611	913625	914233	1	109	0.0952381	609	58	putative inner membrane protein	not required
STMMW_08621	STMMW_08621	914241	914801	1	549	0.424242	561	238	putative inner membrane protein	not required
STMMW_08631	ybhN	914804	915766	-1	514	0.245067	963	236	putative membrane protein	not required
STMMW_08641	ybhO	915766	917007	-1	808	0.232689	1242	289	putative phospholipase	not required
STMMW_08651	ybhP	917004	917762	-1	459	0.213439	759	162	conserved hypothetical protein	not required
STMMW_08661	ybhQ	917895	918305	1	365	0.284672	411	117	putative membrane protein	not required
STMMW_08671	ybhR	918267	919373	-1	829	0.260163	1107	288	putative inner membrane protein	not required
STMMW_08681	ybhS	919489	920619	-1	1036	0.311229	1131	352	putative inner membrane protein	not required
STMMW_08691	ybhF	920612	922348	-1	1748	0.309729	1737	538	hypothetical ABC transporter ATP-binding protein	not required
STMMW_08701	STMMW_08701	922341	923336	-1	1002	0.337349	996	336	HlyD-family secretion protein	not required
STMMW_08711	ybiH	923336	924010	-1	585	0.297778	675	201	hypothetical tetR-family transcriptional regulator	not required
STMMW_08721	rhlE	924240	925604	1	985	0.262271	1365	358	putative ATP-dependent RNA helicase rhlE	not required
STMMW_08731	dinG	925911	927956	1	1300	0.217498	2046	445	probable ATP-dependent helicase	not required
STMMW_08741	ybiB	927986	928960	1	543	0.191795	975	187	putative glycosyltransferase	not required
STMMW_08751	ybiJ	929116	929376	-1	77	0.141762	261	37	putative exported protein	not required
STMMW_08761	ybiI	929661	929927	-1	80	0.209738	267	56	hypothetical Zinc-finger containing protein	not required
STMMW_08771	ybiN	930132	931058	1	464	0.192017	927	178	conserved hypothetical protein	not required
STMMW_08781	ybiO	931055	933277	-1	1064	0.187135	2223	416	putative membrane protein	not required
STMMW_08791	glnQ	933396	934118	-1	375	0.206086	723	149	glutamine transport ATP-binding protein GlnQ	not required
STMMW_08801	glnP	934115	934774	-1	282	0.195455	660	129	glutamine transport system permease protein GlnP	not required
STMMW_08811	glnH	934918	935664	-1	533	0.278447	747	208	glutamine-binding periplasmic protein precursor	not required
STMMW_08821	dps	936141	936644	-1	567	0.382937	504	193	DNA protection during starvation protein	not required
STMMW_08831	ybiF	936947	937834	-1	658	0.291667	888	259	putative membrane protein	not required
STMMW_08841	ompX	938188	938703	1	311	0.186047	516	96	outer membrane protein x precursor	not required
STMMW_08851	ybiP	938766	940342	-1	684	0.198478	1577	313	putative membrane protein (pseudogene)	not required
STMMW_08861	mntR	940921	941394	1	262	0.166667	474	79	transcriptional regulator (iron dependant repressor family)	not required
STMMW_08871	ybiR	941391	942503	1	667	0.208446	1113	232	putative membrane protein	not required
STMMW_08881	ybiS	942547	943467	-1	520	0.242128	921	223	putative exported protein	not required
STMMW_08891	ybiT	943686	945278	1	620	0.149404	1593	238	ABC transporter ATP-binding protein	not required
STMMW_08901	STMMW_08901	945887	946630	1	440	0.271505	744	202	conserved hypothetical protein	not required
STMMW_08911	ybiV2	946659	947189	-1	691	0.457627	531	243	conserved hypothetical protein	not required
STMMW_08921	ybiU	947583	948848	-1	582	0.194313	1266	246	conserved hypothetical protein	not required
STMMW_08931	ybiV1	949110	949919	1	519	0.228395	810	185	conserved hypothetical protein	not required
STMMW_08941	pflF	949997	952429	-1	2293	0.295109	2433	718	putative formate acetyltransferase 3	not required
STMMW_08951	pflE	952435	953334	-1	798	0.283333	900	255	putative pyruvate formate-lyase 3 activating enzyme	not required
STMMW_08961	moeB	953612	954361	-1	718	0.318667	750	239	molybdopterin biosynthesis MoeB protein	not required
STMMW_08971	moeA	954361	955602	-1	909	0.26409	1242	328	molybdopterin biosynthesis MoeA protein	not required
STMMW_08981	ybiK	955799	956740	1	669	0.248408	942	234	putative L-asparaginase	not required
STMMW_08991	yliA	956751	958622	1	1378	0.258013	1872	483	hypothetical ABC transporter ATP-binding protein	not required
STMMW_09001	yliB	958655	960193	1	1170	0.268356	1539	413	putative ABC transporter periplasmic binding protein	not required
STMMW_09011	yliC	960254	961174	1	472	0.192182	921	177	hypothetical ABC transporter permease protein	not required
STMMW_09021	yliD	961177	962088	1	477	0.212719	912	194	hypothetical ABC transporter permease protein	not required
STMMW_09031	rimO	962179	963504	-1	735	0.19457	1326	258	conserved hypothetical protein	not required
STMMW_09041	bssR	963735	964118	1	200	0.109375	384	42	conserved hypothetical protein	not required
STMMW_09051	STMMW_09051	964831	965346	1	39	0.0406977	516	21	conserved hypothetical protein	required
STMMW_09061	STMMW_09061	965264	966118	1	53	0.0385965	855	33	putative electron transfer flavoprotein (beta subunit)	required
STMMW_09071	STMMW_09071	966129	967076	1	309	0.130802	948	124	putative electron transfer flavoprotein (alpha subunit)	not required
STMMW_09081	STMMW_09081	967370	968533	1	1046	0.294674	1164	343	putative acyl-CoA dehydrogenase	not required
STMMW_09091	STMMW_09091	968982	970667	1	726	0.181495	1686	306	putative flavoprotein	not required
STMMW_09101	STMMW_09101	970673	971563	-1	437	0.258137	891	230	LysR transcriptional regulator	not required
STMMW_09111	STMMW_09111	971828	972253	-1	666	0.476526	426	203	putative inner membrane protein	not required
STMMW_09121	yliI	972600	973280	1	381	0.20558	681	140	putative dehydrogenase	not required
STMMW_09131	yliJ	973277	973903	-1	234	0.172249	627	108	glutathione s-transferase family protein	not required
STMMW_09141	dacC	974147	975349	1	724	0.167914	1203	202	D-alanyl-D-alanine carboxypeptidase (penicillin- binding protein 6 precursor)	not required
STMMW_09151	deoR	975394	976152	-1	447	0.230567	759	175	deoxyribose operon repressor	not required
STMMW_09161	ybjG	976224	976832	-1	459	0.249589	609	152	putative permease protein	not required
STMMW_09171	mdfA	977145	978377	1	792	0.248175	1233	306	multidrug translocase MdfA	not required
STMMW_09181	STMMW_09181	978431	979246	-1	520	0.275735	816	225	conserved hypothetical protein	not required
STMMW_09191	STMMW_09191	979243	980454	-1	805	0.25	1212	303	putative membrane protein	not required
STMMW_09201	STMMW_09201	980622	981242	1	469	0.280193	621	174	putative TetR-family transcriptional regulator	not required
STMMW_09211	STMMW_09211	981359	983044	-1	1193	0.260973	1686	440	putative membrane protein	not required
STMMW_09221	ybjM	983315	983692	1	330	0.357143	378	135	putative membrane protein	not required
STMMW_09231	grxA	983724	983987	-1	85	0.17803	264	47	glutaredoxin 1	not required
STMMW_09241	ybjC	984157	984447	1	179	0.257732	291	75	putative putative membrane protein	not required
STMMW_09251	mdaA	984494	985153	1	459	0.259091	660	171	oxygen-insensitive NADPH nitroreductase	not required
STMMW_09261	rimK	985211	986113	1	520	0.221484	903	200	ribosomal protein S6 modification protein	not required
STMMW_09271	ybjN	986210	986686	1	287	0.230608	477	110	conserved hypothetical protein	not required
STMMW_09281	potF	987035	988147	1	491	0.180593	1113	201	putrescine-binding periplasmic protein precursor	not required
STMMW_09291	potG	988235	989368	1	750	0.244268	1134	277	putrescine transport ATP-binding protein PotG	not required
STMMW_09301	potH	989378	990331	1	694	0.283019	954	270	putrescine transport system permease protein PotH	not required
STMMW_09311	potI	990328	991173	1	623	0.229314	846	194	putrescine transport system permease protein PotI	not required
STMMW_09321	ybjO	991247	991720	1	357	0.291139	474	138	putative membrane protein	not required
STMMW_09331	rumB	991763	992893	1	741	0.183908	1131	208	hypothetical RNA methyltransferase	not required
STMMW_09341	STMMW_09341	993176	994519	1	803	0.216518	1344	291	possible transport protein	not required
STMMW_09351	STMMW_09351	994549	994869	1	162	0.299065	321	96	putative phosphotransferase enzyme II, B component	not required
STMMW_09361	STMMW_09361	994879	996366	1	539	0.179435	1488	267	probable sulfatase	not required
STMMW_09371	artJ	996585	997316	-1	291	0.196721	732	144	arginine-binding periplasmic protein 2 precursor	not required
STMMW_09381	artM	997553	998221	-1	447	0.254111	669	170	arginine transport system permease protein ArtM	not required
STMMW_09391	artQ	998221	998937	-1	472	0.270572	717	194	arginine transport system permease protein ArtQ	not required
STMMW_09401	artI	998944	999675	-1	540	0.244536	732	179	arginine-binding periplasmic protein 1 precursor	not required
STMMW_09411	artP	999693	1000421	-1	382	0.185185	729	135	arginine transport ATP-binding protein ArtP	not required
STMMW_09421	ybjP	1000651	1001166	-1	270	0.203488	516	105	probable lipoprotein	not required
STMMW_09431	STMMW_09431	1001294	1001617	1	185	0.17284	324	56	conserved hypothetical protein	not required
STMMW_09441	ybjR	1001614	1002444	1	446	0.186522	831	155	putative N-acetylmuramoyl-L-alanine amidase	not required
STMMW_09451	STMMW_09451	1002441	1003454	-1	526	0.20217	1014	205	putative oxidoreductase	not required
STMMW_09461	ybjT	1003550	1004983	-1	749	0.198047	1434	284	conserved hypothetical protein	not required
STMMW_09471	ltaA	1004994	1005980	-1	829	0.27153	987	268	L-allo-threonine aldolase	not required
STMMW_09481	poxB	1006019	1007737	-1	1606	0.292612	1719	503	pyruvate dehydrogenase	not required
STMMW_09491	hcr	1007895	1008866	-1	905	0.271605	972	264	NADH oxidoreductase Hcr	not required
STMMW_09501	hcp	1008875	1010527	-1	1466	0.274652	1653	454	prismane protein homolog (hybrid-cluster protein)	not required
STMMW_09511	ybjE	1010671	1011462	-1	1023	0.367424	792	291	putative membrane protein	not required
STMMW_09521	ybjD	1011772	1013430	1	1014	0.220615	1659	366	conserved hypothetical protein	not required
STMMW_09531	ybjX	1013427	1014395	-1	2260	0.560372	969	543	putative virK protein	not required
STMMW_09541	macA	1014523	1015641	1	760	0.280608	1119	314	putative exported protein	not required
STMMW_09551	macB	1015638	1017582	1	1087	0.216452	1945	421	conserved hypothetical ABC transporter (pseudogene)	not required
STMMW_09561	cspD	1017712	1017933	-1	81	0.198198	222	44	cold shock-like protein	not required
STMMW_09571	clpS	1018257	1018577	1	101	0.161994	321	52	conserved hypothetical protein	not required
STMMW_09581	clpA	1018608	1020884	1	1171	0.183575	2277	418	ATP-dependent Clp protease ATP-binding subunit ClpA	not required
STMMW_09591	tnp	1021076	1021534	1	3057	0.910675	459	418	transposase for the IS1541 insertion element	not required
STMMW_09601	STMMW_09601	1021997	1022680	-1	574	0.30117	684	206	putative integrase protein	not required
STMMW_09602	STMMW_09602	1022683	1022841	-1	150	0.301887	159	48	conserved hypothetical protein	not required
STMMW_09611	STMMW_09611	1022851	1023252	-1	236	0.278607	402	112	ISPsy11, transposase OrfA	not required
STMMW_09621	STMMW_09621	1023589	1024266	-1	429	0.249263	678	169	conserved hypothetical protein	not required
STMMW_09631	STMMW_09631	1024286	1025146	-1	554	0.238095	861	205	putative pirin-related protein	not required
STMMW_09641	STMMW_09641	1025255	1026166	1	1684	0.332237	912	303	hypothetical transcriptional activator	not required
STMMW_09651	infA	1026257	1026475	-1	197	0.123288	219	27	initiation factor IF-1	not required
STMMW_09661	STMMW_09661	1026403	1026732	-1	61	0.112121	330	37	inner membrane protein	not required
STMMW_09671	aat	1026787	1027491	-1	311	0.17305	705	122	leucyl/phenylalanyl-tRNA-protein transferase	not required
STMMW_09681	cydC	1027536	1029257	-1	107	0.0214866	1722	37	transport ATP-binding protein CydC	required
STMMW_09691	cydD	1029258	1031024	-1	58	0.0198076	1767	35	transport ATP-binding protein CydD	required
STMMW_09701	trxB	1031138	1032106	-1	219	0.123839	969	120	thioredoxin reductase	not required
STMMW_09711	lrp	1032652	1033146	1	356	0.252525	495	125	leucine-responsive regulatory protein	not required
STMMW_09721	ftsK	1033224	1037366	1	160	0.0267922	4143	111	cell division protein FtsK	required
STMMW_09731	lolA	1037506	1038120	1	21	0.00813008	615	5	outer membrane lipoprotein carrier protein precursor	required
STMMW_09741	ycaJ	1038130	1039473	1	884	0.221726	1344	298	conserevd hypothetical protein	not required
STMMW_09751	serS	1039732	1041024	1	7	0.000773395	1293	1	seryl-tRNA synthetase	required
STMMW_09761	dmsA	1041261	1043705	1	2043	0.269121	2445	658	anaerobic dimethyl sulfoxide reductase chain A precursor	not required
STMMW_09771	dmsB	1043716	1044333	1	728	0.381877	618	236	anaerobic dimethyl sulfoxide reductase chain B	not required
STMMW_09781	dmsC	1044335	1045198	1	1041	0.366898	864	317	anaerobic dimethyl sulfoxide reductase chain C	not required
STMMW_09791	ycaD	1045548	1046696	1	978	0.267189	1149	307	probable transport protein	not required
STMMW_09801	ycaM	1046914	1048335	1	1984	0.484529	1422	689	probable transport protein	not required
STMMW_09811	pflA	1048628	1049452	-1	802	0.398788	825	329	pyruvate formate-lyase 1 activating enzyme	not required
STMMW_09821	STMMW_09821	1049544	1049870	-1	469	0.333333	327	109	putative conserved hypothetical protein	not required
STMMW_09831	sopD2	1050001	1050960	1	378	0.103125	960	99	putative sopD2 type III secretion system effector protein	not required
STMMW_09841	pflB	1051036	1053318	-1	1448	0.255366	2283	583	formate acetyltransferase 1	not required
STMMW_09851	focA	1053378	1054235	-1	779	0.370629	858	318	probable formate transporter (formate channel)	not required
STMMW_09861	ycaO	1054640	1056400	-1	1425	0.317433	1761	559	conserved hypothetical protein	not required
STMMW_09871	ycaP	1056537	1057229	1	585	0.292929	693	203	putative membrane protein	not required
STMMW_09881	serC	1057415	1058503	1	808	0.247016	1089	269	phosphoserine aminotransferase	not required
STMMW_09891	aroA	1058574	1059857	1	680	0.208723	1284	268	3-phosphoshikimate 1-carboxyvinyltransferase	not required
STMMW_09901	ycaL	1060000	1060761	1	509	0.254593	762	194	putative lipoprotein	not required
STMMW_09911	cmk	1060934	1061617	1	14	0.0175439	684	12	cytidylate kinase	required
STMMW_09921	rpsA	1061731	1063404	1	13	0.00358423	1674	6	30S ribosomal protein S1	required
STMMW_09931	himD	1063560	1063844	1	47	0.0807018	285	23	integration host factor beta-subunit (IHF-beta)	not required
STMMW_09941	rec2	1064074	1066338	1	1915	0.278587	2265	631	putative competence-related protein	not required
STMMW_09951	msbA	1066375	1068123	1	2	0.00114351	1749	2	probable transport ATP-binding protein MsbA	required
STMMW_09961	lpxK	1068120	1069097	1	17	0.00613497	978	6	tetraacyldisaccharide 4'-kinase	required
STMMW_09971	ycaQ	1069141	1070373	1	935	0.261152	1233	322	conserved hypothetical protein	not required
STMMW_09981	ycaR	1070425	1070607	1	0	0	183	0	conserved hypothetical protein	required
STMMW_09991	kdsB	1070604	1071350	1	11	0.00535475	747	4	3-deoxy-manno-octulosonate cytidylyltransferase	required
STMMW_10001	STMMW_10001	1071561	1072454	1	688	0.281879	894	252	conserved hypothetical protein	not required
STMMW_10011	ycbC	1072434	1073210	-1	446	0.256113	777	199	putative membrane protein	not required
STMMW_10021	smtA	1073346	1074149	1	433	0.196517	804	158	SmtA protein	not required
STMMW_10031	mukF	1074142	1075464	1	15	0.00604686	1323	8	killing factor KicB	required
STMMW_10041	mukE	1075445	1076149	1	30	0.0141844	705	10	KicA protein	required
STMMW_10051	mukB	1076149	1080615	1	546	0.0250728	4467	112	cell division protein	required
STMMW_10061	ycbB	1080960	1082801	1	1237	0.232899	1842	429	putative exported protein	not required
STMMW_10071	ycbK	1083061	1083609	1	231	0.156648	549	86	putative exported protein	not required
STMMW_10081	ycbL	1083637	1084284	1	395	0.226852	648	147	conserved hypothetical protein	not required
STMMW_10091	aspC	1084346	1085536	-1	355	0.132662	1191	158	aspartate aminotransferase	not required
STMMW_10101	ompF	1085721	1086812	-1	339	0.138278	1092	151	outer membrane protein F precursor	not required
STMMW_10111	asnCa	1087419	1088819	-1	2	0.00142755	1401	2	asparaginyl-tRNA synthetase	required
STMMW_10121	STMMW_10121	1089020	1089481	-1	217	0.15368	462	71	putative transcriptional regulator	not required
STMMW_10131	dpaL	1089798	1091012	1	740	0.223868	1215	272	diaminopropionate ammonia-lyase (ec 4.3.1.15) (diaminopropionatase) (alpha,beta-diaminopropionate ammonia-lyase)	not required
STMMW_10141	STMMW_10141	1091257	1092693	1	371	0.117606	1437	169	putative putative ion:amino acid symporter	not required
STMMW_10151	pncB	1092771	1093973	-1	369	0.130507	1203	157	nicotinate phosphoribosyltransferase (ec 2.4.2.11) (naprtase)	not required
STMMW_10161	STMMW_10161	1094168	1095460	-1	590	0.184068	1293	238	integrase	not required
STMMW_10171	STMMW_10171	1095505	1095753	-1	97	0.196787	249	49	excisionase	not required
STMMW_10181	STMMW_10181	1095794	1096033	-1	209	0.3375	240	81	predicted prophage protein	not required
STMMW_10182	STMMW_10182	1096076	1097185	-1	1601	0.411712	1110	457	predicted prophage protein	not required
STMMW_10191	recEa	1097196	1100081	-1	2726	0.31982	2886	923	exodeoxyribonuclease	not required
STMMW_10201	STMMW_10201	1100208	1100507	-1	297	0.296667	300	89	predicted prophage protein	not required
STMMW_10211	STMMW_10211	1100529	1100687	-1	108	0.383648	159	61	predicted prophage protein	not required
STMMW_10221	STMMW_10221	1100680	1100940	-1	145	0.279693	261	73	predicted prophage protein	not required
STMMW_10231	STMMW_10231	1100990	1101400	-1	22	0.00729927	411	3	probable regulatory protein	required
STMMW_10241	C1	1101725	1102099	1	158	0.157333	375	59	probable regulatory protein	not required
STMMW_10251	STMMW_10251	1102184	1103106	1	760	0.295775	923	273	predicted prophage protein replication Protein O	not required
STMMW_10261	STMMW_10261	1103109	1103858	1	356	0.186667	750	140	ATPase involved in DNA replication initiation	not required
STMMW_10271	STMMW_10271	1103869	1104216	1	93	0.12931	348	45	predicted prophage protein	not required
STMMW_10281	STMMW_10281	1104213	1104524	1	263	0.233974	312	73	predicted prophage protein	not required
STMMW_10291	STMMW_10291	1104602	1104892	1	192	0.206186	291	60	predicted prophage protein	not required
STMMW_10301	STMMW_10301	1105184	1105417	1	238	0.320513	234	75	predicted prophage protein	not required
STMMW_10311	STMMW_10311	1105833	1106435	1	499	0.313433	603	189	predicted prophage protein	not required
STMMW_10321	ninG	1106644	1107255	1	305	0.179739	612	110	predicted prophage protein	not required
STMMW_10331	STMMW_10331	1107252	1107398	1	104	0.210884	147	31	predicted prophage protein	not required
STMMW_10341	STMMW_10341	1107388	1108185	1	928	0.345865	798	276	putative antitermination protein	not required
STMMW_10351	STMMW_10351	1108252	1108568	1	240	0.328076	317	104	conserved prophage Protein (pseudogene)	not required
STMMW_10361	STMMW_10361	1108742	1108867	1	104	0.333333	126	42	predicted prophage protein	not required
STMMW_10371	STMMW_10371	1109003	1109452	-1	440	0.257778	450	116	predicted prophage protein	not required
STMMW_10381	gtgA	1109813	1110499	-1	1286	0.510917	687	351	predicted prophage protein	not required
STMMW_10392	STMMW_10392	1110769	1111104	1	532	0.556548	336	187	putative holin	not required
STMMW_10391	nucD	1111088	1111540	1	298	0.278146	453	126	lysozyme	not required
STMMW_10401	STMMW_10401	1111537	1112037	1	313	0.241517	501	121	predicted prophage protein	not required
STMMW_10411	STMMW_10411	1112245	1112778	1	236	0.213483	534	114	predicted prophage protein	not required
STMMW_10421	STMMW_10421	1112738	1114873	1	1410	0.257959	2136	551	phage terminase large subunit	not required
STMMW_10422	STMMW_10422	1114870	1115076	1	182	0.381643	207	79	predicted prophage protein	not required
STMMW_10431	STMMW_10431	1115073	1116620	1	1349	0.29845	1548	462	predicted prophage portal protein	not required
STMMW_10441	STMMW_10441	1116571	1118625	1	1890	0.289538	2055	595	Clp-like protease	not required
STMMW_10451	STMMW_10451	1118716	1119039	1	233	0.231481	324	75	putative RecA/RadA recombinase	not required
STMMW_10461	STMMW_10461	1119032	1119331	1	261	0.296667	300	89	ATP-binding sugar transporter-like protein	not required
STMMW_10471	STMMW_10471	1119312	1119878	1	418	0.280423	567	159	probable minor tail protein	not required
STMMW_10481	STMMW_10481	1119875	1120276	1	982	0.574627	402	231	probable minor tail protein	not required
STMMW_10491	STMMW_10491	1120288	1121037	1	882	0.386667	750	290	probable major tail protein	not required
STMMW_10501	STMMW_10501	1121083	1121481	1	490	0.390977	399	156	probable minor tail protein	not required
STMMW_10511	STMMW_10511	1121544	1121807	1	241	0.359848	264	95	probable minor tail protein	not required
STMMW_10521	STMMW_10521	1121887	1124874	1	3595	0.371821	2988	1111	probable tape measure protein	not required
STMMW_10531	STMMW_10531	1124871	1125203	1	234	0.315315	333	105	probable minor tail protein	not required
STMMW_10541	STMMW_10541	1125302	1125799	1	554	0.385542	498	192	attachment and invasion protein	not required
STMMW_10551	sodCa	1125916	1126449	-1	418	0.305243	534	163	superoxide dismutase precursor (Cu-Zn)	not required
STMMW_10561	STMMW_10561	1126539	1127234	1	481	0.257184	696	179	probable minor tail protein	not required
STMMW_10571	STMMW_10571	1127244	1127981	1	980	0.360434	738	266	probable tail assembly protein	not required
STMMW_10581	STMMW_10581	1128041	1128583	1	573	0.372007	543	202	probable tail assembly protein	not required
STMMW_10591	STMMW_10591	1128655	1132005	1	3802	0.342883	3351	1149	host specificity protein	not required
STMMW_10601	STMMW_10601	1132340	1134778	1	2454	0.285773	2439	697	probable tail fiber protein	not required
STMMW_10611	STMMW_10611	1134778	1135359	1	668	0.408935	582	238	putative tail fibre assembly protein	not required
STMMW_10621	STMMW_10621	1135363	1135578	-1	233	0.375	216	81		not required
STMMW_10631	sseI	1135835	1137631	1	2755	0.402337	1797	723	putative type III secreted protein (pseudogene)	not required
STMMW_10641	STMMW_10641	1136757	1137473	-1	1687	0.609484	717	437	IS26 transposase	not required
STMMW_10651	STMMW_10651	1137729	1138147	1	382	0.286396	419	120	transposase (remnant)	not required
STMMW_10661	STMMW_10661	1138279	1138905	-1	710	0.248804	627	156	predicted prophage protein	not required
STMMW_10671	STMMW_10671	1138974	1139261	-1	79	0.159722	288	46	predicted prophage protein	not required
STMMW_10681	gtgE	1139258	1139944	-1	110	0.112082	687	77	predicted prophage protein	not required
STMMW_10691	gtgF	1140215	1140406	-1	113	0.291667	192	56	Homolog of msgA	not required
STMMW_10701	pepN	1140833	1143445	1	1845	0.251818	2613	658	aminopeptidase N	not required
STMMW_10711	pyrD	1143653	1144663	1	446	0.161227	1011	163	dihydroorotate dehydrogenase	not required
STMMW_10721	ycbW	1144829	1145371	1	400	0.314917	543	171	conserved hypothetical protein	not required
STMMW_10731	STMMW_10731	1145368	1146477	-1	368	0.120721	1110	134	conserved hypothetical protein	not required
STMMW_10741	rlmL	1146576	1148684	1	1102	0.204836	2109	432	conserved hypothetical protein	not required
STMMW_10751	uup	1148697	1150604	1	774	0.162998	1908	311	ABC transporter ATP-binding protein	not required
STMMW_10761	pqiA	1150619	1151872	1	656	0.195375	1254	245	putative inner membrane protein	not required
STMMW_10771	pqiB	1151877	1153517	1	729	0.167581	1641	275	putative secreted protein	not required
STMMW_10781	ymbA	1153514	1154077	1	367	0.221631	564	125	putative lipoprotein	not required
STMMW_10791	rmf	1154333	1154500	1	83	0.125	168	21	ribosome modulation factor (protein E)	not required
STMMW_10801	fabA	1154600	1155118	-1	3	0.00385356	519	2	D-3-hydroxydecanoyl-(acyl carrier-protein)	required
STMMW_10811	lonH	1155187	1156773	-1	875	0.219282	1587	348	conserved hypothetical protein	not required
STMMW_10821	ycbG	1157133	1157585	1	73	0.0838852	453	38	conserved hypothetical protein	not required
STMMW_10831	ompA	1157657	1158709	-1	226	0.125356	1053	132	outer membrane protein A	not required
STMMW_10841	sulA	1159066	1159575	-1	209	0.162745	510	83	cell division inhibitor	not required
STMMW_10851	sxy	1159792	1160397	1	319	0.184818	606	112	conserved hypothetical protein	not required
STMMW_10861	yccS	1160384	1162537	-1	1664	0.263695	2154	568	putative membrane protein	not required
STMMW_10871	yccF	1162556	1163002	-1	236	0.223714	447	100	putative membrane protein	not required
STMMW_10881	helD	1163126	1165180	1	1065	0.204866	2055	421	helicase IV (75 kD helicase)	not required
STMMW_10891	mgsA	1165216	1165674	-1	267	0.220044	459	101	methylglyoxal synthase	not required
STMMW_10901	yccT	1165769	1166431	-1	176	0.143288	663	95	putative secreted protein	not required
STMMW_10911	STMMW_10911	1166602	1167018	1	224	0.199041	417	83	conserved hypothetical protein	not required
STMMW_10921	yccV	1167063	1167380	-1	242	0.261006	318	83	conserved hypothetical protein	not required
STMMW_10931	yccW	1167438	1168649	-1	519	0.163366	1212	198	conserved hypothetical protein	not required
STMMW_10941	STMMW_10941	1168864	1169412	1	272	0.196721	549	108	putative exported protein	not required
STMMW_10951	STMMW_10951	1169438	1170217	1	482	0.224359	780	175	putative transcriptional regulator	not required
STMMW_10961	yccX	1170266	1170547	1	75	0.0886525	282	25	putative acylphosphatase	not required
STMMW_10971	yccK	1170544	1170873	-1	4	0.00909091	330	3	hypothetical protein in helD-serT intergenic region	required
STMMW_10981	yccA	1170960	1171538	-1	271	0.177893	579	103	putative membrane protein	not required
STMMW_10991	pipA	1172240	1172920	-1	712	0.299559	681	204	conserved hypothetical protein	not required
STMMW_11001	pipB	1173141	1174016	-1	50	0.0365297	876	32	conserved hypothetical protein	required
STMMW_11011	STMMW_11011	1174234	1174554	1	2	0.00623053	321	2	conserved hypothetical inner membrane protein	required
STMMW_11021	pipC	1174564	1174905	-1	222	0.371345	342	127	cell invasion protein	not required
STMMW_11031	sopB	1174922	1176607	-1	1756	0.403321	1686	680	cell invasion protein	not required
STMMW_11041	pipD	1176790	1178076	-1	1964	0.473193	1287	609	(pseudogene)	not required
STMMW_11051	copS	1178249	1179613	-1	1567	0.395604	1365	540	histidine kinase	not required
STMMW_11061	copR	1179606	1180352	-1	572	0.255689	747	191	response regulator	not required
STMMW_11071	STMMW_11071	1180422	1180832	1	274	0.274939	411	113	putative exported protein	not required
STMMW_11081	hpaC	1181165	1181677	-1	283	0.22807	513	117	4-hydroxyphenylacetate 3-monooxygenase coupling protein	not required
STMMW_11091	hpaB	1181695	1183257	-1	710	0.198337	1563	310	4-hydroxyphenylacetate 3-monooxygenase	not required
STMMW_11101	hpaR	1183475	1183915	-1	209	0.170068	441	75	homoprotocatechuate degradative operon repressor	not required
STMMW_11111	hpaG	1184190	1185479	1	742	0.207752	1290	268	4-hydroxyphenylacetate degradation bifunctional isomerase/decarboxylase [includes: 2-hydroxyhepta-2,4- diene-1,7-dioate isomerase	not required
STMMW_11121	hpaE	1185476	1186942	1	1010	0.239264	1467	351	5-carboxymethyl-2-hydroxymuconate semialdehyde dehydrogenase (ec 1.2.1.-) (chms dehydrogenase)	not required
STMMW_11131	hpaD	1186944	1187795	1	684	0.29108	852	248	3,4-dihydroxyphenylacetate 2,3-dioxygenase	not required
STMMW_11141	hpaF	1187805	1188185	1	252	0.2021	381	77	5-carboxymethyl-2-hydroxymuconate delta- isomerase	not required
STMMW_11151	hpaH	1188328	1189131	1	800	0.325871	804	262	2-oxo-hepta-3-ene-1,7-dioic acid hydratase	not required
STMMW_11161	hpaI	1189142	1189933	1	682	0.276515	792	219	2,4-dihydroxyhept-2-ene-1,7-dioic acid aldolase	not required
STMMW_11171	hpaX	1190005	1191381	1	967	0.269426	1377	371	putative 4-hydroxyphenylacetate permease	not required
STMMW_11181	hpaA	1191391	1192287	1	363	0.170569	897	153	4-hydroxyphenylacetate 3-monooxygenase operon regulatory protein	not required
STMMW_11191	STMMW_11191	1192322	1193239	1	451	0.1939	918	178	hypothetical protein	not required
STMMW_11201	STMMW_11201	1193647	1194009	-1	115	0.209366	363	76	conserved hypothetical protein	not required
STMMW_11211	yccD	1194663	1194968	-1	239	0.333333	306	102	conserved hypothetical protein	not required
STMMW_11221	cbpA	1194968	1195888	-1	530	0.236699	921	218	curved DNA-binding protein	not required
STMMW_11231	STMMW_11231	1196008	1196202	-1	140	0.153846	195	30	conserved hypothetical protein	not required
STMMW_11240	scsA	1196123	1196485	1	259	0.231405	363	84	suppression of copper sensitivity: putative copper binding protein	not required
STMMW_11241	scsB	1196534	1198420	1	982	0.200318	1887	378	membrane protein, suppressor for copper- sensitivity B precursor	not required
STMMW_11251	scsC	1198417	1199040	1	229	0.120192	624	75	secreted protein, suppressor for copper- sensitivity C precursor	not required
STMMW_11261	scsD	1199030	1199536	1	276	0.193294	507	98	secreted protein, suppressor for copper- sensitivity D	not required
STMMW_11271	agp	1199669	1200910	1	932	0.229469	1242	285	glucose-1-phosphatase precursor (G1Pase), secreted	not required
STMMW_11281	yccJ	1200944	1201171	-1	101	0.241228	228	55	conserved hypothetical protein	not required
STMMW_11291	wrbA	1201192	1201788	-1	360	0.227806	597	136	trp repressor binding protein	not required
STMMW_11301	ymdF	1202173	1202340	1	44	0.178571	168	30	conserved hypothetical protein	not required
STMMW_11311	ycdC	1202477	1203115	1	167	0.134585	639	86	putative transcriptional regulator	not required
STMMW_11321	STMMW_11321	1203112	1203507	-1	186	0.186869	396	74	putative secreted protein	not required
STMMW_11331	putA	1203566	1207528	-1	2232	0.190512	3963	755	proline dehydrogenase (proline oxidase)	not required
STMMW_11341	putP	1207950	1209458	1	578	0.169649	1509	256	sodium/proline symporter (proline permease)	not required
STMMW_11351	phoH	1210285	1211139	1	489	0.161404	855	138	PhoH protein (phosphate starvation-inducible protein PsiH)	not required
STMMW_11361	STMMW_11361	1211245	1212126	-1	315	0.146259	882	129	putative transcriptional regulator	not required
STMMW_11371	STMMW_11371	1212411	1213907	-1	769	0.179025	1497	268	putative sodium/glucose cotransporter	not required
STMMW_11381	STMMW_11381	1214244	1214924	-1	1373	0.580029	681	395	conserved hypothetical protein	not required
STMMW_11391	STMMW_11391	1215430	1216590	1	213	0.0654608	1161	76	putative exported protein	ambiguous
STMMW_11401	STMMW_11401	1216636	1217328	1	5	0.00577201	693	4	putative secreted protein	required
STMMW_11411	STMMW_11411	1217611	1218891	1	800	0.259173	1281	332	putative transporter	not required
STMMW_11421	STMMW_11421	1218902	1220008	1	756	0.280036	1107	310	putative oxidoreductase	not required
STMMW_11431	ycdW	1220852	1221790	1	425	0.207668	939	195	putative 2-hydroxyacid dehydrogenase in phoh- csgg intergenic region	not required
STMMW_11441	ycdX	1221875	1222612	1	364	0.192412	738	142	conserved hypothetical protein	not required
STMMW_11451	ycdY	1222636	1223190	1	282	0.187387	555	104	conserved hypothetical protein	not required
STMMW_11461	ycdZ	1223300	1223785	1	462	0.168724	486	82	putative membrane protein	not required
STMMW_11471	csgG	1223824	1224570	-1	590	0.283802	747	212	assembly/transport component in curli production	not required
STMMW_11481	csgF	1224684	1225100	-1	153	0.107914	417	45	assembly/transport component in curli production	not required
STMMW_11491	csgE	1225127	1225522	-1	180	0.229798	396	91	assembly/transport component in curli production	not required
STMMW_11501	csgD	1225527	1226177	-1	112	0.0691244	651	45	csg operon transcriptional regulator protein	ambiguous
STMMW_11511	csgB	1226932	1227387	1	124	0.149123	456	68	nucleation component of curlin monomers	not required
STMMW_11521	csgA	1227429	1227884	1	1057	0.60307	456	275	major curlin subunit precursor	not required
STMMW_11531	csgC	1227946	1228272	1	340	0.391437	327	128	curli prooduction protein	not required
STMMW_11541	ymdA	1228403	1228723	1	215	0.327103	321	105	putative exported protein	not required
STMMW_11551	STMMW_11551	1228814	1229353	1	323	0.218519	540	118	conserved hypothetical protein	not required
STMMW_11561	ymdC	1229292	1230776	1	891	0.192593	1485	286	conserved hypothetical protein	not required
STMMW_11571	mdoC	1230793	1231947	-1	1461	0.458874	1155	530	Glucans biosynthesis protein C	not required
STMMW_11581	mdoG	1232219	1233754	1	729	0.193359	1536	297	periplasmic glucans biosynthesis protein MdoG precursor	not required
STMMW_11591	mdoH	1233747	1236290	1	1595	0.209119	2544	532	periplasmic glucans biosynthesis protein	not required
STMMW_11601	yceK	1236364	1236591	1	180	0.315789	228	72	putative lipoprotein	not required
STMMW_11611	msyB	1236592	1236966	-1	294	0.298667	375	112	acidic protein MsyB	not required
STMMW_11621	yceE	1237048	1238262	-1	473	0.158848	1215	193	putative membrane transport protein	not required
STMMW_11631	htrB	1238417	1239337	-1	3	0.00325733	921	3	lipid A biosynthesis lauroyl acyltransferase (EC 2.3.1.-) (heat shock protein)	required
STMMW_11641	yceA	1239557	1240609	1	558	0.226021	1053	238	conserved hypothetical protein	not required
STMMW_11651	yceI	1240661	1241236	-1	273	0.194444	576	112	putative exported protein	not required
STMMW_11661	yceJ	1241233	1241805	-1	722	0.328098	573	188	cytochrome b561 homolog 2	not required
STMMW_11671	yceO	1242068	1242181	-1	26	0.122807	114	14	hypothetical protein	not required
STMMW_11681	solA	1242222	1243340	-1	1153	0.37891	1119	424	MTOX	not required
STMMW_11691	bssS	1243453	1243707	-1	680	0.701961	255	179	conserved hypothetical protein	not required
STMMW_11701	dinI	1243997	1244242	-1	157	0.280488	246	69	damage-inducible protein	not required
STMMW_11711	pyrC	1244316	1245362	-1	359	0.153773	1047	161	DHOase	not required
STMMW_11721	yceB	1245467	1246027	-1	238	0.224599	561	126	putative exported protein	not required
STMMW_11731	grxB	1246152	1246799	-1	306	0.200617	648	130	glutaredoxin 2	not required
STMMW_11741	yceL	1246863	1248071	-1	810	0.230769	1209	279	putative membrane transporter	not required
STMMW_11751	rimJ	1248308	1248892	1	472	0.292308	585	171	ribosomal-protein-alanine acetyltransferase	not required
STMMW_11761	yceH	1248928	1249575	1	384	0.20216	648	131	conserved hypothetical protein	not required
STMMW_11771	mviM	1249577	1250500	1	665	0.261905	924	242	putative virulence factor MviM	not required
STMMW_11781	mviN	1250765	1252339	1	13	0.00825397	1575	13	virulence factor MviN	required
STMMW_11791	flgN	1252421	1252843	-1	235	0.22695	423	96	flagella synthesis protein FlgN	not required
STMMW_11801	flgM	1252848	1253141	-1	115	0.183673	294	54	negative regulator of flagellin synthesis (anti- sigma factor)	not required
STMMW_11811	flgA	1253233	1253892	-1	545	0.242424	660	160	flagellar basal body P-ring protein FlgA precursor	not required
STMMW_11821	flgB	1254049	1254465	1	309	0.211031	417	88	putative flagellar basal-body rod protein FlgB (proximal rod protein)	not required
STMMW_11831	flgC	1254469	1254873	1	320	0.259259	405	105	putative flagellar basal-body rod protein FlgC (proximal rod protein)	not required
STMMW_11841	flgD	1254885	1255583	1	665	0.243205	699	170	flagellar hook formation protein FlgD	not required
STMMW_11851	flgE	1255610	1256821	1	956	0.268977	1212	326	flagellar hook protein FlgE	not required
STMMW_11861	flgF	1256842	1257597	1	787	0.287037	756	217	putative flagellar basal-body rod protein FlgF (proximal rod protein)	not required
STMMW_11871	flgG	1257611	1258393	1	665	0.247765	783	194	flagellar basal-body rod protein FlgG (distal rod protein)	not required
STMMW_11881	flgH	1258448	1259146	1	434	0.23176	699	162	Basal body L-ring protein	not required
STMMW_11891	flgI	1259158	1260255	1	1527	0.364299	1098	400	Basal body P-ring protein	not required
STMMW_11901	flgJ	1260255	1261205	1	754	0.266036	951	253	flagellar protein FlgJ	not required
STMMW_11911	flgK	1261270	1262931	1	1024	0.215403	1662	358	flagellar hook-associated protein 1	not required
STMMW_11921	flgL	1262946	1263899	1	388	0.148847	954	142	flagellar hook-associated protein 3	not required
STMMW_11931	rne	1264156	1267359	-1	244	0.0383895	3204	123	ribonuclease E	required
STMMW_11941	STMMW_11941	1267495	1267743	1	2	0.00803213	249	2	conserved hypothetical protein	required
STMMW_11951	rluC	1267933	1268892	1	384	0.170833	960	164	ribosomal large subunit pseudouridine synthase C (EC 4.2.1.70)	not required
STMMW_11961	STMMW_11961	1269048	1269791	1	716	0.303763	744	226	putative inner membrane lipoprotein	not required
STMMW_11971	STMMW_11971	1269997	1270221	1	219	0.382222	225	86	conserved hypothetical protein	not required
STMMW_11981	mafa	1270293	1270877	-1	379	0.220513	585	129	conserved hypothetical protein	not required
STMMW_11991	yceD	1271075	1271596	1	101	0.0842912	522	44	conserved hypothetical protein	not required
STMMW_12001	rpl32	1271648	1271821	1	24	0.0574713	174	10	50S ribosomal protein L32	ambiguous
STMMW_12011	plsX	1271955	1273034	1	431	0.190741	1080	206	Fatty acid/phospholipid synthesis protein plsX	not required
STMMW_12021	fabH	1273114	1274067	1	4	0.00314465	954	3	3-oxoacyl-[acyl-carrier-protein] synthase III	required
STMMW_12031	fabD	1274083	1275012	1	7	0.00322581	930	3	malonyl CoA-acyl carrier protein transacylase	required
STMMW_12041	fabG	1275025	1275759	1	1	0.00136054	735	1	3-oxoacyl-[acyl-carrier protein] reductase	required
STMMW_12051	acpP	1275915	1276151	1	0	0	237	0	ACP	required
STMMW_12061	fabF	1276273	1277478	1	244	0.0986733	1206	119	3-oxoacyl-[acyl-carrier-protein] synthase II	not required
STMMW_12071	pabC	1277602	1278411	1	506	0.21358	810	173	4-amino-4-deoxychorismate lyase	not required
STMMW_12081	yceG	1278480	1279436	1	499	0.190178	957	182	putative secreted protein	not required
STMMW_12091	tmk	1279426	1280067	1	8	0.0124611	642	8	dTMP kinase	required
STMMW_12101	holB	1280064	1281068	1	37	0.0119403	1005	12	DNA polymerase III, delta' subunit	required
STMMW_12111	ycfH	1281079	1281876	1	444	0.23183	798	185	conserved hypothetical protein	not required
STMMW_12121	ptsG	1282171	1283604	1	726	0.186192	1434	267	PTS system, glucose-specific IIBC component	not required
STMMW_12131	fhuE	1283689	1285863	-1	1237	0.227586	2175	495	outer-membrane receptor for Fe(iii)-coprogen, fe(iii)-ferrioxamine b and fe(iii)-rhodotrulic acid	not required
STMMW_12141	ycfF	1286205	1286564	1	180	0.2	360	72	putative protein kinase C inhibitor	not required
STMMW_12151	ycfL	1286567	1286941	1	186	0.205333	375	77	putative lipoprotein	not required
STMMW_12161	ycfM	1286955	1287593	1	489	0.256651	639	164	putative lipoprotein	not required
STMMW_12171	thiK	1287574	1288398	1	557	0.260606	825	215	conserved hypothetical protein	not required
STMMW_12181	nagZ	1288409	1289434	1	550	0.19883	1026	204	Beta-N-acetylhexosaminidase	not required
STMMW_12191	ycfP	1289459	1290001	1	233	0.169429	543	92	conserved hypothetical protein	not required
STMMW_12201	ndh	1290256	1291560	1	216	0.08659	1305	113	NADH dehydrogenase	not required
STMMW_12211	ycfJ	1291739	1292278	1	232	0.17963	540	97	putative secreted protein	not required
STMMW_12221	ycfQ	1292353	1292988	-1	271	0.18239	636	116	Putative TetR-family regulatory protein	not required
STMMW_12231	ycfR	1293230	1293487	1	53	0.116279	258	30	putative secreted protein	not required
STMMW_12241	ycfS	1293584	1294549	-1	399	0.184265	966	178	putative exported protein	not required
STMMW_12251	mfd	1294697	1298143	-1	2091	0.199594	3447	688	transcription-repair coupling factor (TrcF)	not required
STMMW_12261	ycfU	1298370	1299680	1	32	0.0175439	1311	23	ABC transporter integral membrane subunit	required
STMMW_12271	lolD	1299673	1300374	1	7	0.002849	702	2	ABC transporter ATP-binding subunit	required
STMMW_12281	ycfW	1300374	1301618	1	1	0.000803213	1245	1	ABC transporter integral membrane subunit	required
STMMW_12291	ycfX	1301647	1302558	1	286	0.140351	912	128	putative ROK-family protein	not required
STMMW_12301	cobB	1302577	1303398	1	208	0.110706	822	91	putative regulatory protein	not required
STMMW_12311	potD	1303480	1304526	-1	150	0.0773639	1047	81	spermidine/putrescine-binding periplasmic protein precursor	ambiguous
STMMW_12321	potC	1304551	1305330	-1	233	0.120513	780	94	spermidine/putrescine transport system permease protein PotC	not required
STMMW_12331	sifA	1305646	1306656	-1	148	0.0613254	1011	62	putative virulence determinant	ambiguous
STMMW_12341	potB	1306985	1307848	-1	602	0.30787	864	266	spermidine/putrescine transport system permease protein PotB	not required
STMMW_12351	potA	1307832	1308968	-1	283	0.126649	1137	144	spermidine/putrescine transport ATP-binding protein PotA (ABC superfamily)	not required
STMMW_12361	pepT	1309219	1310448	1	553	0.164228	1230	202	aminotripeptidase	not required
STMMW_12371	STMMW_12371	1310452	1312497	1	4715	0.458456	2046	938	conserved hypothetical protein (pseudogene)	not required
STMMW_12381	STMMW_12381	1310659	1311117	1	3076	0.912854	459	419	putative transposase	not required
STMMW_12391	ycfD	1312537	1313658	-1	398	0.164884	1122	185	conserved hypothetical protein	not required
STMMW_12401	phoQ	1313739	1315202	-1	496	0.137295	1464	201	sensor protein PhoQ, regulator of virulence determinants	not required
STMMW_12411	phoP	1315202	1315876	-1	204	0.128889	675	87	transcriptional regulatory protein PhoP, regulator of virulence determinants	not required
STMMW_12421	purB	1316000	1317370	-1	6	0.00364697	1371	5	adenylosuccinate lyase	required
STMMW_12431	ycfC	1317374	1318021	-1	73	0.0756173	648	49	conserved hypothetical protein	ambiguous
STMMW_12441	mnmA	1318102	1319208	-1	6	0.00542005	1107	6	5-methylaminomethyl-2-thiouridylate-methyltrans ferase EC 2.1.1.61	required
STMMW_12451	ymfB	1319262	1319723	-1	84	0.0692641	462	32	putative MutT family protein	ambiguous
STMMW_12461	STMMW_12461	1319735	1320064	-1	56	0.0848485	330	28	putative secreted protein	not required
STMMW_12471	rluB	1320061	1320726	-1	149	0.0840841	666	56	putative ribosomal large subunit pseudouridine synthase B	not required
STMMW_12481	icdA	1320898	1322148	1	1	0.000799361	1251	1	isocitrate dehydrogenase	required
STMMW_12491	STMMW_12491	1322596	1323720	1	63	0.0266667	1125	30	putative bacteriophage protein	required
STMMW_12501	envF	1324702	1325490	-1	9	0.00887199	789	7	lipoprotein	required
STMMW_12511	msgA	1325979	1326218	-1	167	0.270833	240	65	putative virulence protein (MsgA)	not required
STMMW_12521	envE	1326409	1326930	-1	412	0.233716	522	122	putative lipoprotein	not required
STMMW_12531	cspH	1327345	1327557	-1	147	0.352113	213	75	cold shock protein (CspH)	not required
STMMW_12541	pagD	1327689	1327952	-1	11	0.0340909	264	9	putative outer membrane virulence protein (PagD)	required
STMMW_12551	pagC	1328851	1329321	1	163	0.227176	471	107	outer membrane invasion protein (PagC)	not required
STMMW_12561	pliC	1330558	1330902	-1	333	0.411594	345	142	putative secreted protein	not required
STMMW_12562	STMMW_12562	1331280	1331405	1	55	0.206349	126	26	putative lipoprotein	not required
STMMW_12571	STMMW_12571	1331605	1331877	1	81	0.205128	273	56	hypothetical protein	not required
STMMW_12581	STMMW_12581	1332029	1332496	1	232	0.17094	468	80	putative heat shock protein	not required
STMMW_12591	STMMW_12591	1332835	1333878	1	601	0.195402	1044	204	hypothetical protein	not required
STMMW_12601	STMMW_12601	1333961	1334491	-1	268	0.201507	531	107	putative cytochrome	not required
STMMW_12611	STMMW_12611	1334640	1334954	-1	236	0.295238	315	93	putative lipoprotein	not required
STMMW_12621	STMMW_12621	1335636	1337270	1	482	0.148012	1635	242	putative substrate-binding transport protein	not required
STMMW_12631	STMMW_12631	1337270	1338244	1	407	0.169231	975	165	putative inner membrane transport protein	not required
STMMW_12641	STMMW_12641	1338234	1339046	1	400	0.184502	813	150	putative inner membrane transport protein	not required
STMMW_12651	STMMW_12651	1339040	1339837	1	351	0.189223	798	151	putative ABC transport ATP-binding protein	not required
STMMW_12661	STMMW_12661	1339831	1340421	1	262	0.172589	591	102	putative ABC transport ATP-binding subunit	not required
STMMW_12671	STMMW_12671	1340503	1341636	-1	490	0.208995	1134	237	putative membrane protein	not required
STMMW_12681	STMMW_12681	1341830	1342156	1	117	0.155963	327	51	conserved hypothetical protein	not required
STMMW_12691	STMMW_12691	1342353	1343000	1	325	0.148148	648	96	putative exported protein	not required
STMMW_12701	aadA	1343109	1343897	1	378	0.179975	789	142	aminoglycoside-resistance protein	not required
STMMW_12711	STMMW_12711	1344042	1344635	1	68	0.0656566	594	39	putative regulatory protein	ambiguous
STMMW_12721	STMMW_12721	1344704	1345552	1	453	0.220259	849	187	putative transcriptional regulator	not required
STMMW_12731	STMMW_12731	1345807	1346055	-1	73	0.188755	249	47	hypothetical protein	not required
STMMW_12741	STMMW_12741	1346134	1346283	-1	10	0.0533333	150	8	hypothetical protein	ambiguous
STMMW_12751	aroQ	1346366	1346911	1	288	0.212454	546	116	putative chorismate mutase	not required
STMMW_12761	yeaS	1347108	1347746	1	213	0.111111	639	71	putative membrane transport protein	not required
STMMW_12771	yeaR	1347919	1348281	1	59	0.115702	363	42	conserved hypothetical protein	not required
STMMW_12781	yoaG	1348284	1348466	1	55	0.10929	183	20	conserved hypothetical protein	not required
STMMW_12791	STMMW_12791	1348696	1349337	1	179	0.132399	642	85	putative membrane protein	not required
STMMW_12801	STMMW_12801	1349459	1349644	1	42	0.172043	186	32	conserved hypothetical protein	not required
STMMW_12811	yeaQ	1349652	1349900	1	26	0.0722892	249	18	putative inner membrane protein	ambiguous
STMMW_12821	yaoF	1350333	1350584	1	85	0.115079	252	29	conserved hypothetical protein	not required
STMMW_12831	STMMW_12831	1350653	1350964	1	33	0.0544872	312	17	hypothetical protein	ambiguous
STMMW_12841	yeaO	1350950	1351297	-1	35	0.0373563	348	13	putative bacteriophage protein	required
STMMW_12851	yeaN	1351416	1352600	-1	243	0.105485	1185	125	putative membrane protein	not required
STMMW_12861	yeaM	1352701	1353495	1	251	0.130818	795	104	putative transcriptional regulator	not required
STMMW_12862	yeaL	1353475	1353921	-1	63	0.0738255	447	33	putative membrane protein	ambiguous
STMMW_12881	yeaK	1354231	1354749	-1	256	0.150289	519	78	conserved hypothetical protein	not required
STMMW_12891	yeaJ	1354799	1356292	-1	961	0.226238	1494	338	conserved hypothetical membrane protein	not required
STMMW_12901	yeaH	1356933	1358219	-1	457	0.176379	1287	227	conserved hypothetical protein	not required
STMMW_12911	yeaG	1358342	1360276	-1	624	0.135401	1935	262	conserved hypothetical protein	not required
STMMW_12921	mipA	1360703	1361449	1	254	0.127175	747	95	putative outer membrane protein	not required
STMMW_12931	STMMW_12931	1361739	1362935	1	296	0.112782	1197	135	putative regulatory protein	not required
STMMW_12941	STMMW_12941	1363032	1363889	1	340	0.16317	858	140	putative oxidoreductase	not required
STMMW_12951	yeaD	1363988	1364872	-1	256	0.122034	885	108	conserved hypothetical protein	not required
STMMW_12961	STMMW_12961	1364872	1365126	-1	35	0.0705882	255	18	conserved hypothetical protein	ambiguous
STMMW_12971	gapA	1365207	1366202	-1	155	0.00702811	996	7	glyceraldehyde 3-phosphate dehydrogenase a	required
STMMW_12981	yeaA	1366514	1366957	1	144	0.0923423	444	41	conserved hypothetical protein	not required
STMMW_12991	yeaC	1366999	1367277	1	46	0.0537634	279	15	conserved hypothetical protein	ambiguous
STMMW_13001	nam	1367629	1368285	-1	267	0.170472	657	112	pyrazinamidase/nicotinamidase	not required
STMMW_13011	ansA	1368312	1369328	-1	264	0.093412	1017	95	L-asparaginase I	not required
STMMW_13021	sppA	1369424	1371280	-1	666	0.157781	1857	293	protease IV	not required
STMMW_13031	ydjA	1371454	1372005	1	124	0.101449	552	56	putative nitroreductase	not required
STMMW_13041	selD	1372123	1373166	1	389	0.140805	1044	147	Selenium donor protein	not required
STMMW_13051	topB	1373171	1375120	1	424	0.085641	1950	167	DNA topoisomerase iii	not required
STMMW_13061	gdhA	1375150	1376493	-1	401	0.116815	1344	157	NADP-specific glutamate dehydrogenase	not required
STMMW_13071	STMMW_13071	1376732	1377007	1	82	0.15942	276	44	putative exported protein	not required
STMMW_13081	STMMW_13081	1376967	1377383	-1	121	0.0935252	417	39	putative MutT-family protein	not required
STMMW_13091	xthA	1377456	1378262	-1	162	0.111524	807	90	exodeoxyribonuclease III	not required
STMMW_13101	argDa	1378708	1379934	1	384	0.114099	1227	140	Acetylornithine/succinyldiaminopimelate aminotransferase	not required
STMMW_13111	astA	1379925	1380959	1	213	0.0830918	1035	86	arginine N-succinyltransferase	not required
STMMW_13121	astD	1380956	1382434	1	380	0.112914	1479	167	succinylglutamic semialdehyde dehydrogenase	not required
STMMW_13131	astB	1382431	1383774	1	309	0.0885417	1344	119	succinylarginine dihydrolase	not required
STMMW_13141	astE	1383767	1384735	1	215	0.0784314	969	76	succinylglutamate desuccinylase	ambiguous
STMMW_13151	STMMW_13151	1385071	1385556	1	197	0.22428	486	109	putative exported protein	not required
STMMW_13161	STMMW_13161	1385631	1386539	-1	232	0.126513	909	115	conserved hypothetical protein	not required
STMMW_13171	nadE	1386633	1387460	-1	13	0.0144928	828	12	3-dependent NAD synthetase EC 6.3.1.5. Probable glutamine-dependent NAD synthetase EC 6.3.5.1	required
STMMW_13181	osmE	1387679	1388020	1	89	0.0935673	342	32	osmotically inducible lipoprotein E precursor	not required
STMMW_13191	celA	1388321	1388641	1	136	0.109034	321	35	PTS system, cellobiose-specific IIb component	not required
STMMW_13201	celB	1388724	1390082	1	425	0.164827	1359	224	PTS system, cellobiose-specific IIC component	not required
STMMW_13211	celC	1390133	1390480	1	218	0.158046	348	55	phosphoenolpyruvate dependent phosphotransferase enzyme III-cellobiose	not required
STMMW_13221	celD	1390569	1391333	1	251	0.0849673	765	65	putative cel operon repressor	not required
STMMW_13231	celF	1391458	1392813	1	277	0.115044	1356	156	phospho-beta-glucosidase B	not required
STMMW_13241	celG	1392826	1393584	1	222	0.0961792	759	73	conserved hypothetical protein	not required
STMMW_13251	katE	1393628	1395880	-1	545	0.1083	2253	244	catalase HPII	not required
STMMW_13261	cedA	1396245	1396487	1	72	0.17284	243	42	cell division activator CedA	not required
STMMW_13271	ydjN	1396589	1397980	-1	499	0.161638	1392	225	putative sodium:dicarboxylate symporter	not required
STMMW_13281	ydjM	1398117	1398716	-1	182	0.118333	600	71	putative membrane protein	not required
STMMW_13291	yniC	1398854	1399522	-1	180	0.112108	669	75	putative hydrolase	not required
STMMW_13301	yniB	1399671	1400207	1	115	0.0800745	537	43	putative membrane protein	not required
STMMW_13311	STMMW_13311	1400250	1401110	-1	254	0.103368	861	89	conserved hypothetical protein	not required
STMMW_13321	ydiZ	1401217	1401507	-1	34	0.0343643	291	10	conserved hypothetical protein	required
STMMW_13331	pfkB	1401604	1402536	-1	353	0.145766	933	136	6-phosphofructokinase isozyme	not required
STMMW_13341	ydiY	1402825	1403583	1	418	0.192358	759	146	putative outer membrane protein	not required
STMMW_13351	lpxR	1403632	1404591	-1	335	0.128125	960	123	putative outer membrane protein	not required
STMMW_13361	STMMW_13361	1404734	1405048	1	13	0.0349206	315	11	putative membrane protein	required
STMMW_13371	STMMW_13371	1405063	1405899	1	536	0.250896	837	210	putative DNA/RNA non-specific endonuclease	not required
STMMW_13381	STMMW_13381	1406072	1406278	1	65	0.154589	207	32	conserved hypothetical protein	not required
STMMW_13391	rfc	1406601	1407824	-1	13	0.00898693	1224	11	O-antigen polymerase	required
STMMW_13401	thrS	1408716	1410644	1	28	0.00155521	1929	3	ThrRS	required
STMMW_13411	infC	1410756	1411190	1	0	0	435	0	Translation initiation factor IF-3. Translation initiation factor IF-3, chloroplast	required
STMMW_13421	rpl35	1411286	1411483	1	0	0	198	0	50S ribosomal protein L35. Chloroplast 50S ribosomal protein L35	required
STMMW_13431	rpl20	1411534	1411890	1	0	0	357	0	50S ribosomal subunit protein L20	required
STMMW_13441	pheS	1412192	1413175	1	1	0.00101626	984	1	PheRS	required
STMMW_13451	pheT	1413191	1415578	1	14	0.00167504	2388	4	PheRS	required
STMMW_13461	himA	1415583	1415882	1	30	0.0733333	300	22	integration host factor alpha-subunit	ambiguous
STMMW_13471	btuC	1416076	1417065	1	209	0.0868687	990	86	Vitamin B12 transport system permease protein btuC	not required
STMMW_13481	btuE	1417157	1417708	1	70	0.0634058	552	35	putative glutathione peroxidase/vitamin B12 transport periplasmic protein BtuE	ambiguous
STMMW_13491	btuD	1417708	1418457	1	103	0.0613333	750	46	vitamin B12 ABC transport ATP-binding protein	ambiguous
STMMW_13501	nlpC	1418534	1418998	1	150	0.0924731	465	43	putative lipoprotein	not required
STMMW_13511	ydiV	1419312	1420025	1	254	0.14986	714	107	conserved hypothetical protein	not required
STMMW_13521	ydiU	1420087	1421529	1	214	0.0672211	1443	97	conserved hypothetical protein	ambiguous
STMMW_13531	ydiE	1421564	1421755	-1	34	0.0989583	192	19	conserved hypothetical protein	not required
STMMW_13541	aroH	1421912	1422958	-1	222	0.0983763	1047	103	3-deoxy-D-arabinoheptulosonate 7-phosphate synthase	not required
STMMW_13551	ydiA	1423114	1423947	-1	162	0.0539568	834	45	conserved hypothetical protein	ambiguous
STMMW_13561	pps	1424284	1426662	1	651	0.105086	2379	250	phosphoenolpyruvate synthase	not required
STMMW_13571	ydiD	1426704	1428344	-1	520	0.155393	1641	255	putative putative ligase/synthetase	not required
STMMW_13581	ydiT	1428434	1428727	-1	86	0.153061	294	45	ferredoxin-like protein	not required
STMMW_13591	ydiS	1428724	1430010	-1	315	0.114996	1287	148	putative electron transfer flavoprotein-quinone oxidoreductase	not required
STMMW_13601	ydiR	1430067	1431002	-1	233	0.112179	936	105	putative electron transfer flavoprotein subunit	not required
STMMW_13611	ydiQ	1431024	1431788	-1	133	0.0705882	765	54	putative electron transfer flavoprotein subunit	ambiguous
STMMW_13621	ydiP	1432251	1433141	1	31	0.0213244	891	19	putative HTH-type transcriptional regulator	required
STMMW_13631	ydiO	1433217	1434368	-1	386	0.150174	1152	173	putative acyl-CoA dehydrogenase	not required
STMMW_13641	ydiF	1434382	1435935	-1	282	0.0958816	1554	149	putative acetyl CoA transferase	not required
STMMW_13651	aroD	1436131	1436889	-1	103	0.0909091	759	69	3-dehydroquinate dehydratase	not required
STMMW_13661	aroE	1436934	1437800	-1	254	0.128028	867	111	shikimate 5-dehydrogenase	not required
STMMW_13671	ydiN	1437867	1439102	-1	211	0.0873786	1236	108	Putative MFS-family transport protein	not required
STMMW_13681	ydiM	1439466	1440677	-1	435	0.189769	1212	230	Putative MFS-family transport protein	not required
STMMW_13691	ydiL	1440818	1441177	-1	30	0.0527778	360	19	conserved hypothetical protein	ambiguous
STMMW_13701	ydiK	1441635	1442753	-1	244	0.0902592	1119	101	lipoprotein	not required
STMMW_13711	ydiJ	1443018	1446074	1	517	0.0709846	3057	217	conserved hypothetical FAD-binding protein	ambiguous
STMMW_13721	STMMW_13721	1446071	1446481	1	128	0.0778589	411	32	conserved hypothetical protein	ambiguous
STMMW_13731	ydiH	1446580	1446768	1	25	0.047619	189	9	conserved hypothetical protein	required
STMMW_13741	STMMW_13741	1447056	1448402	-1	413	0.106904	1347	144	putative transporter	not required
STMMW_13751	sufA	1448829	1449197	1	45	0.0677507	369	25	conserved hypothetical protein	ambiguous
STMMW_13761	sufB	1449206	1450693	1	274	0.0853495	1488	127	conserved hypothetical protein	not required
STMMW_13771	sufC	1450710	1451456	1	201	0.105756	747	79	putative ABC transport ATP-binding subunit	not required
STMMW_13781	sufD	1451431	1452702	1	378	0.115566	1272	147	conserved hypothetical protein	not required
STMMW_13791	sufS	1452699	1453919	1	292	0.0884521	1221	108	putative amintransferase	not required
STMMW_13801	ynhA	1453932	1454348	1	38	0.0311751	417	13	conserved hypothetical protein	required
STMMW_13811	ynhG	1454503	1455504	1	117	0.0548902	1002	55	putative exported protein	ambiguous
STMMW_13821	lppB	1455571	1455810	-1	69	0.1	240	24	major outer membrane lipoprotein	not required
STMMW_13822	lpp	1455893	1456129	-1	12	0.021097	237	5	major outer membrane lipoprotein	required
STMMW_13831	pykF	1456440	1457798	-1	112	0.0551876	1359	75	pyruvate kinase	ambiguous
STMMW_13841	orf48	1458254	1459597	-1	245	0.0922619	1344	124	putative amino acid permease	not required
STMMW_13851	orf32	1459619	1460512	-1	280	0.111857	894	100	putative hydrolase	not required
STMMW_13861	orf245	1460571	1461308	-1	16	0.0121951	738	9	Orf 245 protein	required
STMMW_13871	orf408	1461320	1462546	-1	125	0.0643847	1227	79	putative ribokinase/regulatory protein	ambiguous
STMMW_13881	ttrA	1462869	1465931	-1	378	0.0594189	3063	182	tetrathionate reductase subunit A	ambiguous
STMMW_13891	ttrC	1465924	1466946	-1	230	0.0860215	1023	88	tetrathionate reductase subunit C (membrane protein)	not required
STMMW_13901	ttrB	1466947	1467699	-1	154	0.0903054	753	68	tetrathionate reductase subunit B	not required
STMMW_13911	ttrS	1467863	1469641	1	279	0.0623946	1779	111	putative histidine kinase, two component regulatory protein	ambiguous
STMMW_13921	ttrR	1469616	1470236	1	96	0.0724638	621	45	putative two-component response regulator	ambiguous
STMMW_13931	orf70	1470334	1470546	1	9	0.0375587	213	8	pathogenicity island protein	required
STMMW_13941	orf319	1470642	1471601	-1	148	0.0760417	960	73	putative pathogenicity island protein	ambiguous
STMMW_13951	orf242	1471774	1472502	-1	166	0.0836763	729	61	putative transcriptional regulator	not required
STMMW_13961	ssrB	1472681	1473319	-1	157	0.0829421	639	53	putative two-component response regulator	not required
STMMW_13971	ssrA	1473350	1476112	-1	139	0.029316	2763	81	putative two-component sensor kinase	required
STMMW_13981	ssaB	1476513	1476914	1	8	0.0199005	402	8	putative pathogenicity island 2 secreted effector protein	required
STMMW_13991	ssaC	1476916	1478409	1	241	0.0742972	1494	111	putative outer membrane secretory protein	ambiguous
STMMW_14001	ssaD	1478390	1479601	1	119	0.0618812	1212	75	putative pathogenicity island protein	ambiguous
STMMW_14011	ssaE	1479609	1479851	1	10	0.0288066	243	7	type three secretion system protein	required
STMMW_14021	sseA	1480115	1480441	1	8	0.0214067	327	7	putative pathogenicity island protein	required
STMMW_14031	sseBa	1480448	1481038	1	152	0.152284	591	90	putative pathogenicity island effector effector protein	not required
STMMW_14041	sscA	1481035	1481508	1	78	0.0991561	474	47	putative Type III secretion system chaperone protein	not required
STMMW_14051	sseC	1481511	1482965	1	242	0.0790378	1455	115	putative pathogenicity island effector protein	not required
STMMW_14061	sseD	1482981	1483568	1	366	0.258503	588	152	putative pathogenicity island effector protein	not required
STMMW_14071	sseE	1483571	1483987	1	96	0.0743405	417	31	putative pathogenicity island effector protein	ambiguous
STMMW_14081	sscB	1484039	1484473	1	132	0.188506	435	82	putative pathogenicity island protein	not required
STMMW_14091	sseF	1484489	1485271	1	340	0.209451	783	164	putative pathogenicity island effector protein	not required
STMMW_14101	sseG	1485268	1485957	1	354	0.155072	690	107	putative pathogenicity island effector protein	not required
STMMW_14111	ssaG	1486051	1486266	1	4	0.00925926	216	2	putative pathogenicity island protein	required
STMMW_14121	ssaH	1486307	1486534	1	1	0.00438596	228	1	Type three secretion system apparatus	required
STMMW_14131	ssaI	1486546	1486794	1	3	0.0120482	249	3	putative pathogenicity island protein	required
STMMW_14141	ssaJ	1486791	1487540	1	5	0.00266667	750	2	putative pathogenicity island lipoprotein	required
STMMW_14151	STMMW_14151	1487558	1488106	1	19	0.0218579	549	12	putative pathogenicity island protein	required
STMMW_14161	ssaK	1488103	1488777	1	91	0.0844444	675	57	putative pathogenicity island protein	not required
STMMW_14171	ssaL	1488743	1489759	1	399	0.163225	1017	166	putative secretion system protein	not required
STMMW_14181	ssaM	1489817	1490185	1	28	0.0704607	369	26	putative pathogenicity island protein	ambiguous
STMMW_14191	ssaV	1490170	1492215	1	630	0.165689	2046	339	putative type III secretion protein	not required
STMMW_14201	ssaN	1492205	1493506	1	429	0.133641	1302	174	putative type III secretion ATP synthase	not required
STMMW_14211	ssaO	1493455	1493886	1	124	0.0763889	432	33	putative type III secretion protein	ambiguous
STMMW_14221	ssaP	1493867	1494241	1	233	0.250667	375	94	putative type III secretion protein	not required
STMMW_14231	ssaQ	1494222	1495190	1	607	0.196078	969	190	putative type III secretion protein	not required
STMMW_14241	ssaR	1495258	1495905	1	10	0.00925926	648	6	putative type III secretion protein	required
STMMW_14251	ssaS	1495902	1496168	1	2	0.00374532	267	1	putative type III secretion protein	required
STMMW_14261	ssaT	1496169	1496948	1	6	0.00769231	780	6	putative type III secretion protein	required
STMMW_14271	ssaU	1496945	1498003	1	134	0.075543	1059	80	putative type III secretion protein	ambiguous
STMMW_14281	norM	1498476	1499849	-1	229	0.0611354	1374	84	Multidrug-efflux transporter	ambiguous
STMMW_14291	ribE	1500066	1500707	1	27	0.0264798	642	17	riboflavin synthase alpha chain	required
STMMW_14301	cfa	1500749	1501897	-1	205	0.0870322	1149	100	cyclopropane-fatty-acyl-phospholipid synthase	not required
STMMW_14311	ydhC	1502187	1503392	-1	142	0.0605307	1206	73	putative integral membrane transport protein	ambiguous
STMMW_14321	ydhB	1503505	1504437	1	180	0.0803859	933	75	putative transcriptional regulator	not required
STMMW_14331	purR	1504434	1505459	-1	108	0.0516569	1026	53	purine nucleotide synthesis repressor	required
STMMW_14332	ynhF	1505755	1505844	1	3	0.0111111	90	1	conserved sORF	required
STMMW_14341	sodB	1505927	1506508	-1	147	0.101375	582	59	superoxide dismutase	not required
STMMW_14351	ydhO	1506635	1507489	-1	124	0.0666667	855	57	putative secreted protein	ambiguous
STMMW_14361	ydhD	1507791	1508138	1	53	0.0890805	348	31	conserved hypothetical protein	not required
STMMW_14371	rnt	1508216	1508863	-1	21	0.0262346	648	17	Exoribonuclease T	required
STMMW_14381	gloA	1508964	1509371	-1	60	0.0808824	408	33	lactoylglutathione lyase	not required
STMMW_14391	nemA	1509440	1510537	-1	179	0.0710383	1098	78	N-ethylmaleimide reductase	ambiguous
STMMW_14401	ydhM	1510596	1511195	-1	101	0.085	600	51	putative TetR-family transcriptional regulator	not required
STMMW_14411	ydhL	1511298	1511537	1	32	0.075	240	18	conserved hypothetical protein	ambiguous
STMMW_14421	ydhF	1511588	1512484	1	134	0.06466	897	58	putative oxidoreductase	ambiguous
STMMW_14431	sodCb	1512564	1513085	1	169	0.113027	522	59	copper-zinc superoxide dismutase	not required
STMMW_14441	STMMW_14441	1513061	1515100	-1	715	0.128431	2040	262	putative membrane protein	not required
STMMW_14451	ydhJ	1515100	1515996	-1	158	0.0635452	897	57	putative HlyD-family protein	ambiguous
STMMW_14461	ydhI	1515963	1516199	-1	21	0.0506329	237	12	putative membrane protein	required
STMMW_14471	slyA	1516394	1516834	1	6	0.0113379	441	5	Transcriptional regulator	required
STMMW_14481	slyB	1516882	1517349	-1	95	0.0918803	468	43	outer membrane lipoprotein SlyB precursor	not required
STMMW_14491	anmK	1517621	1518742	1	229	0.083779	1122	94	conserved hypothetical protein	not required
STMMW_14501	mliC	1518830	1519159	1	61	0.1	330	33	lipoprotein	not required
STMMW_14511	pdxH	1519218	1519874	1	6	0.00761035	657	5	pyridoxamine 5'-phosphate oxidase	required
STMMW_14521	tyrS	1520001	1521275	1	1	0.000784314	1275	1	tyrosyl-tRNA synthetase	required
STMMW_14531	pdxY	1521335	1522195	1	177	0.0847851	861	73	pyridoxamine kinase (ec 2.7.1.35) (pm kinase)	not required
STMMW_14541	gst	1522254	1522859	-1	58	0.0429043	606	26	glutathione S-transferase	required
STMMW_14551	tppB	1522964	1524469	-1	280	0.0916335	1506	138	putative proton/oligopeptide symporter	not required
STMMW_14561	nth	1525071	1525706	-1	105	0.0628931	636	40	endonuclease III	ambiguous
STMMW_14571	rnfE	1525706	1526398	-1	76	0.0577201	693	40	electron transport complex protein	ambiguous
STMMW_14581	rnfG	1526401	1527021	-1	71	0.0611916	621	38	electron transport complex protein RnfG	ambiguous
STMMW_14591	rnfD	1527025	1528083	-1	108	0.0557129	1059	59	electron transport complex protein RnfD	ambiguous
STMMW_14601	rnfC	1528084	1530291	-1	422	0.0828804	2208	183	Electron transport complex protein rnfC	not required
STMMW_14611	rnfB	1530284	1530862	-1	95	0.074266	579	43	Electron transport complex protein rnfB	ambiguous
STMMW_14621	rnfA	1530862	1531443	-1	51	0.0498282	582	29	electron transport complex protein RnfA	required
STMMW_14631	ydgK	1531520	1531960	-1	61	0.0634921	441	28	putative membrane protein	ambiguous
STMMW_14641	ydgT	1532049	1532264	-1	41	0.0787037	216	17	conserved hypothetical protein	ambiguous
STMMW_14642	blr	1532562	1532687	-1	24	0.111111	126	14	conserved sORF	not required
STMMW_14651	ydgJ	1532895	1533935	1	190	0.0691643	1041	72	putative oxidoreductase	ambiguous
STMMW_14661	add	1534010	1535011	-1	67	0.0409182	1002	41	Adenosine aminohydrolase	required
STMMW_14671	ydgA	1535715	1537223	-1	248	0.0841617	1509	127	exported protein	not required
STMMW_14681	manA	1537326	1538501	-1	161	0.0646259	1176	76	mannose-6-phosphate isomerase	ambiguous
STMMW_14691	fumA	1538701	1540347	1	328	0.0898604	1647	148	fumarate hydratase class I, aerobic	not required
STMMW_14701	fumC	1540515	1541918	1	282	0.0868946	1404	122	Fumarase C	not required
STMMW_14711	tus	1541915	1542844	-1	103	0.0580645	930	54	DNA replication terminus site-binding protein	ambiguous
STMMW_14721	rstB	1542920	1544221	-1	195	0.0599078	1302	78	two component sensor kinase	ambiguous
STMMW_14731	STMMW_14731	1544332	1546038	-1	280	0.076157	1707	130	conserved hypothetical protein	ambiguous
STMMW_14741	ompN	1546191	1547324	-1	520	0.161376	1134	183	outer membrane protein	not required
STMMW_14751	rstA	1547804	1548535	-1	152	0.112022	732	82	putative two-component response regulator	not required
STMMW_14761	ydgC	1548662	1548997	1	92	0.133929	336	45	putative membrane protein	not required
STMMW_14771	ydgI	1549059	1550441	-1	236	0.0932755	1383	129	putative amino acid permease	not required
STMMW_14781	ydgH	1550740	1551684	-1	181	0.0857143	945	81	putative exported protein	not required
STMMW_14791	pntA	1552211	1553740	1	251	0.0764706	1530	117	pyridine nucleotide transhydrogenase subunit- alpha	ambiguous
STMMW_14801	pntB	1553751	1555139	1	156	0.0511159	1389	71	pyridine nucleotide transhydrogenase subunit- beta	required
STMMW_14811	tqsA	1555314	1556348	-1	446	0.174879	1035	181	putative membrane protein	not required
STMMW_14821	ydgF	1556766	1557128	1	198	0.23416	363	85	putative conserved membrane protein	not required
STMMW_14831	ydgE	1557115	1557444	1	61	0.121212	330	40	putative membrane protein	not required
STMMW_14841	STMMW_14841	1557484	1558305	-1	121	0.0559611	822	46	putative secreted protein	ambiguous
STMMW_14851	asr	1558574	1558858	-1	33	0.0807018	285	23	putative secreted stress response protein	not required
STMMW_14861	ynfM	1559217	1560470	-1	109	0.0470494	1254	59	putative membrane transport protein	required
STMMW_14871	ynfL	1560590	1561489	1	122	0.0566667	900	51	putative regulatory protein	ambiguous
STMMW_14881	mlc	1561617	1562837	1	185	0.0597871	1221	73	putative regulatory protein	ambiguous
STMMW_14891	bioDb	1562963	1563658	1	135	0.0775862	696	54	DTB synthetase	ambiguous
STMMW_14901	clcB	1563614	1564903	-1	165	0.0635659	1290	82	Voltage-gated ClC-type chloride channel clcB. Putative chloride channel protein clcB-like	ambiguous
STMMW_14911	STMMW_14911	1565039	1566187	-1	251	0.0800696	1149	92	putative ABC transporter ATP/GTP-binding protein	not required
STMMW_14921	STMMW_14921	1566187	1566834	-1	95	0.0833333	648	54	putative ABC transporter membrane protein	not required
STMMW_14931	STMMW_14931	1566844	1567746	-1	128	0.0719823	903	65	putative ABC transporter periplasmic binding protein	ambiguous
STMMW_14941	STMMW_14941	1567775	1568485	-1	108	0.04782	711	34	putative ABC transporter membrane protein	required
STMMW_14951	ynfI	1568790	1569404	-1	102	0.0666667	615	41	conserved hypothetical protein	ambiguous
STMMW_14961	STMMW_14961	1569447	1570304	-1	301	0.145688	858	125	putative dimethyl sulphoxide reductase subunit	not required
STMMW_14971	STMMW_14971	1570306	1570923	-1	232	0.197411	618	122	putative anaerobic dimethyl sulfoxide reductase	not required
STMMW_14981	dmsA2	1570934	1573369	-1	483	0.0804598	2436	196	putative dimethyl sulphoxide reductase subunit	not required
STMMW_14991	dmsA1	1573468	1575909	-1	725	0.110156	2442	269	putative dimethyl sulphoxide reductase subunit	not required
STMMW_15001	ynfD	1576063	1576371	-1	15	0.0291262	309	9	putative exported protein	required
STMMW_15011	ynfC	1576466	1577185	1	60	0.0277778	720	20	putative exported protein	required
STMMW_15021	speG	1577226	1577786	-1	131	0.121212	561	68	spermidine N1-acetyltransferase	not required
STMMW_15031	ynfB	1577822	1578163	-1	74	0.114035	342	39	putative secreted protein	not required
STMMW_15041	ynfA	1578316	1578642	1	49	0.0550459	327	18	putative membrane protein	ambiguous
STMMW_15051	rspA	1578764	1579978	1	200	0.0674897	1215	82	starvation sensing protein RspA	ambiguous
STMMW_15061	rspB	1579989	1581008	1	162	0.0480392	1020	49	starvation sensing protein RspB	required
STMMW_15071	ydfJ	1581062	1582438	1	235	0.0915033	1377	126		not required
STMMW_15081	ydfI	1582585	1584051	1	189	0.0518064	1467	76	putative D-mannonate oxidoreductase	required
STMMW_15091	ydfZ	1584118	1584321	-1	44	0.102941	204	21	conserved hypothetical protein	not required
STMMW_15101	ydfH	1584502	1585188	-1	66	0.0393013	687	27	putative regulatory protein	required
STMMW_15111	ydfG	1585318	1586064	-1	159	0.0870147	747	65	putative oxidoreductase	not required
STMMW_15121	dcp	1586203	1588245	1	357	0.0753793	2043	154	dipeptidyl carboxypeptidase II	ambiguous
STMMW_15131	STMMW_15131	1588590	1588772	1	0	0	183	0	conserved hypothetical protein	required
STMMW_15141	ydeJ	1588892	1589419	-1	139	0.126894	528	67	conserved hypothetical protein	not required
STMMW_15151	ydeI	1589846	1590238	1	84	0.109415	393	43	putative periplasmic protein	not required
STMMW_15161	ydeE	1590932	1592105	-1	194	0.0783646	1174	92	putative membrane protein (pseudogene)	ambiguous
STMMW_15171	ydeD	1592333	1593235	1	92	0.0586932	903	53	putative membrane protein	ambiguous
STMMW_15181	marB	1593354	1593569	-1	70	0.180556	216	39	multiple antibiotic resistance protein MarB	not required
STMMW_15191	marA	1593598	1594032	-1	67	0.114943	435	50	multiple antibiotic resistance protein MarA	not required
STMMW_15201	marR	1594001	1594435	-1	66	0.0896552	435	39	multiple antibiotic resistance protein MarR	not required
STMMW_15211	marC	1594694	1595359	1	102	0.0780781	666	52	putative membrane protein	ambiguous
STMMW_15221	sotB	1595406	1596590	-1	304	0.0843882	1185	100	Probable sugar efflux transporter	not required
STMMW_15231	yneJ	1596706	1597578	-1	152	0.069874	873	61	putative regulatory protein	ambiguous
STMMW_15241	yneI	1597681	1599069	1	144	0.0525558	1389	73	putative oxidoreductase	required
STMMW_15251	yneH	1599142	1600068	1	76	0.0507012	927	47	probable glutaminase	required
STMMW_15261	yneG	1600068	1600427	1	24	0.0361111	360	13	conserved hypothetical protein	required
STMMW_15271	STMMW_15271	1600651	1601598	1	246	0.0843882	948	80	putative membrane protein	not required
STMMW_15281	STMMW_15281	1601654	1602196	-1	114	0.0791897	543	43	putative exported protein	not required
STMMW_15291	STMMW_15291	1603015	1604031	1	280	0.110128	1017	112	outer membrane protein	not required
STMMW_15301	STMMW_15301	1604172	1604513	-1	146	0.201754	342	69	hydrogenase nickel incorporation protein (HypA)	not required
STMMW_15311	STMMW_15311	1604526	1605413	-1	144	0.0912162	888	81	putative ATP/GTP-binding protein	not required
STMMW_15321	hyaF2	1605401	1606462	-1	190	0.0640301	1062	68	hydrogenase-1 operon protein HyaF2	ambiguous
STMMW_15331	hyaE2	1606480	1606890	-1	75	0.111922	411	46	hydrogenase-1 operon protein HyaE2	not required
STMMW_15341	STMMW_15341	1606887	1607231	-1	83	0.107246	345	37	hydrogenase isoenzymes formation protein	not required
STMMW_15351	hyaD2	1607186	1607794	-1	86	0.0574713	609	35	hydrogenase 1 maturation protease	ambiguous
STMMW_15361	hyaC2	1607800	1608543	-1	70	0.047043	744	35	Ni/Fe-hydrogenase 1 b-type cytochrome subunit HyaC2	required
STMMW_15371	hyaB2	1608494	1610296	-1	326	0.0793123	1803	143	uptake hydrogenase-1 large subunit	not required
STMMW_15381	hyaA2	1610299	1611402	-1	181	0.0625	1104	69	uptake hydrogenase small subunit	ambiguous
STMMW_15391	STMMW_15391	1611831	1612922	1	196	0.125458	1092	137	putative secreted hydrolase	not required
STMMW_15401	STMMW_15401	1613088	1613759	1	127	0.108631	672	73	putative regulatory protein	not required
STMMW_15411	STMMW_15411	1613818	1614843	-1	181	0.0760234	1026	78	putative alcohol dehydrogenase	ambiguous
STMMW_15421	STMMW_15421	1614818	1616104	-1	135	0.0738151	1287	95	membrane transport protein	ambiguous
STMMW_15431	pqaA	1616281	1617837	-1	23	0.00963391	1557	15	PhoPQ-activated protein	required
STMMW_15441	STMMW_15441	1617907	1619148	-1	171	0.0869565	1242	108	putative multidrug efflux protein	not required
STMMW_15451	STMMW_15451	1619138	1620643	-1	224	0.0584329	1506	88	putative monooxygenase	ambiguous
STMMW_15461	STMMW_15461	1620688	1621176	1	90	0.0777096	489	38	putative regulatory protein	ambiguous
STMMW_15471	STMMW_15471	1621408	1621738	1	16	0.0241692	331	8	(pseudogene)	required
STMMW_15481	STMMW_15481	1621740	1622159	-1	32	0.0380952	420	16	(pseudogene)	required
STMMW_15482	STMMW_15482	1622443	1622652	-1	3	0.00952381	210	2	conserved hypothetical protein	required
STMMW_15491	srgE	1622922	1624388	-1	16	0.0074983	1467	11	conserved hypothetical protein	required
STMMW_15501	STMMW_15501	1624647	1625654	1	145	0.0853175	1008	86	putative putative LacI-family transcriptional regulator	not required
STMMW_15511	STMMW_15511	1625798	1627249	1	228	0.0661157	1452	96	putative Na /H antiporter	ambiguous
STMMW_15521	STMMW_15521	1627262	1628464	1	100	0.0415628	1203	50	putative aminotransferase	required
STMMW_15531	STMMW_15531	1628577	1630652	-1	489	0.107418	2076	223	putative glycogen debranching protein	not required
STMMW_15541	STMMW_15541	1630709	1633237	-1	895	0.0988533	2529	250	putative hydrolase	not required
STMMW_15551	STMMW_15551	1633234	1635018	-1	395	0.0885154	1785	158	putative hydrolase	not required
STMMW_15561	STMMW_15561	1635147	1635932	-1	118	0.0725191	786	57	putative exported protein	ambiguous
STMMW_15571	hdeB	1636075	1636404	-1	168	0.166667	330	55	putative secreted protein	not required
STMMW_15581	osmC	1636754	1637185	-1	115	0.136574	432	59	osmotically inducible protein C	not required
STMMW_15591	yddX	1637698	1637913	1	176	0.328704	216	71	conserved hypothetical protein	not required
STMMW_15601	rpsV	1638008	1638151	1	91	0.229167	144	33	30S ribosomal protein S22	not required
STMMW_15611	sfcA	1638328	1640025	1	397	0.109541	1698	186	NAD-linked malic enzyme	not required
STMMW_15621	adhP	1640392	1641321	1	137	0.0666667	930	62	alcohol dehydrogenase	ambiguous
STMMW_15631	fdnI	1641412	1642053	-1	153	0.132399	642	85	formate dehydrogenase, nitrate-inducible, cytochrome b556(fdn) subunit (formate dehydrogenase-n gamma subunit) (fdh-n gamma subunit) (anaerobic formate dehydrogenase cytochrome b556 subunit)	not required
STMMW_15641	fdnH	1642061	1642945	-1	134	0.0757062	885	67	formate dehydrogenase, nitrate-inducible, iron- sulfur subunit (formate dehydrogenase-n beta subunit) (fdh- n beta subunit) (anaerobic formate dehydrogenase iron- sulfur subunit)	ambiguous
STMMW_15651	fdnG	1642959	1646006	-1	669	0.0849738	3048	259	formate dehydrogenase N (nitrate-inducible, alpha subunit)	not required
STMMW_15661	yddG	1646341	1647165	1	541	0.218182	825	180	putative integral membrane protein	not required
STMMW_15671	ompD	1647690	1648778	1	155	0.0697888	1089	76	outer membrane porin protein (ompD)	ambiguous
STMMW_15681	STMMW_15681	1648922	1649302	1	57	0.0918635	381	35	conserved hypothetical protein	not required
STMMW_15691	smvA	1649327	1650814	-1	296	0.0826613	1488	123	methyl viologen resistance protein SmvA	not required
STMMW_15701	STMMW_15701	1650931	1651509	1	60	0.0379965	579	22	putative regulatory protein	required
STMMW_15711	narU	1651724	1653112	1	208	0.0799136	1389	111	nitrite extrusion protein	not required
STMMW_15721	narZ	1653204	1656944	1	828	0.104518	3741	391	respiratory nitrate reductase 2 alpha chain	not required
STMMW_15731	narY	1656941	1658485	1	401	0.101618	1545	157	respiratory nitrate reductase 2 beta chain	not required
STMMW_15741	narW	1658485	1659180	1	108	0.0747126	696	52	respiratory nitrate reductase 2 delta chain	ambiguous
STMMW_15751	narV	1659177	1659857	1	185	0.0998532	681	68	respiratory nitrate reductase 2 gamma chain	not required
STMMW_15761	yddE	1659963	1660856	1	254	0.105145	894	94	conserved hypothetical protein	not required
STMMW_15771	nhoA	1660892	1661737	-1	128	0.0472813	846	40	N-hydroxyarylamine O-acetyltransferase	required
STMMW_15781	steA	1662021	1662653	-1	223	0.132701	633	84	hypothetical protein	not required
STMMW_15791	ansP	1663166	1664659	1	220	0.0702811	1494	105	L-asparagine permease	ambiguous
STMMW_15801	STMMW_15801	1664736	1664957	-1	58	0.117117	222	26	putative lipoprotein	not required
STMMW_15811	STMMW_15811	1665102	1666163	-1	257	0.0800377	1062	85	possible ATP-binding protein	not required
STMMW_15821	yncD	1666427	1668547	1	268	0.0447902	2121	95	probable TonB-dependent receptor YncD precursor	required
STMMW_15831	yncC	1668614	1669279	-1	226	0.147147	666	98	putative regulatory protein	not required
STMMW_15841	yncB	1669613	1670683	-1	230	0.107376	1071	115	putative NADP-dependent oxidoreductase	not required
STMMW_15851	yncA	1670862	1671377	1	70	0.0794574	516	41	putative acetyltransferase	not required
STMMW_15861	ydcZ	1671377	1671826	1	35	0.04	450	18	putative membrane protein	required
STMMW_15871	ydcY	1671831	1672064	-1	36	0.0683761	234	16	conserved hypothetical protein	ambiguous
STMMW_15881	srfA	1672288	1673607	1	147	0.0560606	1320	74	putative virulence effector protein	ambiguous
STMMW_15891	srfB	1673612	1676593	1	651	0.0861838	2982	257	putative virulence effector protein	not required
STMMW_15901	srfC	1676590	1678734	1	308	0.0629371	2145	135	putative virulence effector protein	ambiguous
STMMW_15911	ydcX	1678779	1679042	-1	27	0.0492424	264	13	putative membrane protein	required
STMMW_15921	ydcW	1679351	1680796	-1	280	0.0816044	1446	118	putative aldehyde dehydrogenase	not required
STMMW_15931	ydcR	1680911	1682335	-1	111	0.045614	1425	65	putative regulatory protein	required
STMMW_15941	pdgL	1682471	1683241	-1	167	0.0817121	771	63	D-alanyl-D-alanine dipeptidase	not required
STMMW_15951	STMMW_15951	1683500	1683730	-1	54	0.0952381	231	22	conserved hypothetical protein	not required
STMMW_15961	ugtL	1683763	1684161	-1	24	0.0250627	399	10	putative membrane protein	required
STMMW_15971	sifB	1684698	1685648	1	14	0.00525762	951	5	hypothetical protein	required
STMMW_15981	yncJ	1685922	1686152	1	29	0.0865801	231	20	putative exported protein	not required
STMMW_15991	ydcP	1686153	1688117	-1	224	0.0447837	1965	88	putative peptidase	required
STMMW_16001	ydcN	1688196	1688732	-1	42	0.0409683	537	22	putative DNA-binding protein	required
STMMW_16011	STMMW_16011	1688823	1690001	1	149	0.0602205	1179	71	putative benzoate membrane transport protein	ambiguous
STMMW_16021	STMMW_16021	1690055	1690723	-1	125	0.0597907	669	40	putative lipoprotein	ambiguous
STMMW_16031	tehB	1690879	1691475	-1	172	0.149079	597	89	tellurite resistance protein TehB	not required
STMMW_16041	tehA	1691462	1692475	-1	268	0.115385	1014	117	tellurite resistance protein TehA	not required
STMMW_16051	ydcK	1692582	1693562	1	248	0.09684	981	95	putative transferase	not required
STMMW_16061	rimL	1693559	1694098	-1	110	0.105556	540	57	ribosomal-protein-serine acetyltransferase	not required
STMMW_16071	STMMW_16071	1694315	1695433	1	202	0.0974084	1119	109	conserved hypothetical protein	not required
STMMW_16081	STMMW_16081	1695430	1695711	1	54	0.106383	282	30	putative phosphotransferase enzyme	not required
STMMW_16091	STMMW_16091	1695863	1697035	1	216	0.0869565	1173	102	putative phosphotransferase enzyme	not required
STMMW_16101	STMMW_16101	1697049	1697855	1	143	0.0656753	807	53	conserved hypothetical protein	ambiguous
STMMW_16111	STMMW_16111	1697987	1698424	1	106	0.114155	438	50	putative phosphotransferase enzyme	not required
STMMW_16121	STMMW_16121	1698436	1699068	1	182	0.0789889	633	50	putative ribulose-5-phosphate 3-epimerase	not required
STMMW_16131	STMMW_16131	1699084	1699875	1	132	0.0643939	792	51	putative regulatory protein	ambiguous
STMMW_16141	aac	1699875	1700312	1	54	0.0388128	438	17	aminoglycoside 6'-N-acetyltransferase	required
STMMW_16151	STMMW_16151	1700359	1701561	-1	571	0.215295	1203	259	putative L-lactate oxidase	not required
STMMW_16161	STMMW_16161	1701573	1702148	-1	67	0.0642361	576	37	putative exported protein	ambiguous
STMMW_16171	ydcG	1702344	1703999	-1	284	0.0911836	1656	151	Glucans biosynthesis protein D precursor	not required
STMMW_16181	STMMW_16181	1704219	1705727	-1	187	0.0503645	1509	76	putative esterase	required
STMMW_16191	STMMW_16191	1705776	1707119	-1	220	0.0766369	1344	103	conserved hypothetical protein	ambiguous
STMMW_16201	ydcI	1707412	1708335	1	68	0.034632	924	32	putative LysR-family transcriptional regulatory protein	required
STMMW_16211	trg	1708396	1710021	-1	249	0.0658057	1626	107	methyl-accepting chemotaxis protein III (mcp- iii) (ribose and galactose chemoreceptor protein)	ambiguous
STMMW_16221	adhC	1710190	1711308	-1	167	0.077748	1119	87	alcohol dehydrogenase class III (ec 1.1.1.1) (glutathione-dependent formaldehyde dehydrogenase) (ec 1.2.1.1) (fdh) (faldh)	ambiguous
STMMW_16231	STMMW_16231	1711340	1711615	-1	57	0.101449	276	28	conserved hypothetical protein	not required
STMMW_16241	steB	1712138	1712539	1	1	0.00248756	402	1	conserved hypothetical protein	required
STMMW_16251	STMMW_16251	1712668	1713384	-1	1	0.0013947	717	1	putative membrane protein	required
STMMW_16261	sseJ	1713810	1715036	1	22	0.0154849	1227	19	salmonella translocated effector protein (SseJ)	required
STMMW_16271	STMMW_16271	1715157	1715501	-1	63	0.107246	345	37	putative membrane protein	not required
STMMW_16281	STMMW_16281	1716408	1717169	1	16	0.0183727	762	14	putative periplasmic amino acid-binding protein	required
STMMW_16291	STMMW_16291	1717176	1717823	1	0	0	648	0	putative ABC amino acid transporter permease	required
STMMW_16301	STMMW_16301	1717848	1718579	1	47	0.0314208	732	23	ABC transporter ATP-binding subunit	required
STMMW_16311	STMMW_16311	1718576	1719256	1	19	0.0161527	681	11	putative amino acid ABC transporter	required
STMMW_16321	STMMW_16321	1719393	1720943	1	190	0.0676983	1551	105	putative membrane protein (pseudogene)	ambiguous
STMMW_16331	STMMW_16331	1721407	1722069	1	179	0.165913	663	110	possible methyltransferase	not required
STMMW_16341	cybB	1722340	1722870	-1	226	0.220339	531	117	cytochrome b561 (cytochrome b-561)	not required
STMMW_16351	ydcF	1722987	1723787	-1	89	0.0599251	801	48	conserved hypothetical protein	ambiguous
STMMW_16361	hrpA	1723851	1727753	-1	567	0.0620036	3903	242	ATP-dependent helicase HrpA	ambiguous
STMMW_16371	acpD	1727954	1728559	1	153	0.130363	606	79	ACP phosphodiesterase	not required
STMMW_16381	STMMW_16381	1728556	1729005	-1	128	0.124444	450	56	hypothetical protein	not required
STMMW_16391	ydbL	1729148	1729471	-1	190	0.262346	324	85	putative secreted protein	not required
STMMW_16401	ynbE	1729479	1729670	-1	58	0.177083	192	34	putative lipoprotein	not required
STMMW_16411	ydbH	1729670	1732306	-1	605	0.109215	2637	288	putative exported protein	not required
STMMW_16421	ldhA	1732546	1733535	1	648	0.115152	990	114	D-lactate dehydrogenase	not required
STMMW_16431	hslJ	1733646	1734056	1	75	0.0948905	411	39	heat shock protein (hslJ)	not required
STMMW_16441	STMMW_16441	1734100	1734255	-1	20	0.0897436	156	14	conserved hypothetical protein	not required
STMMW_16451	STMMW_16451	1734282	1734581	1	32	0.05	300	15	conserved hypothetical protein	required
STMMW_16461	nifJ	1734642	1738166	1	750	0.0822695	3525	290	probable pyruvate-flavodoxin oxidoreductase	not required
STMMW_16471	ynaF	1738648	1739082	1	120	0.124138	435	54	conserved hypothetical protein	not required
STMMW_16481	STMMW_16481	1739132	1739470	-1	132	0.153392	339	52	Putative multi-drug transporter	not required
STMMW_16491	STMMW_16491	1739571	1739771	1	26	0.0945274	201	19		not required
STMMW_16501	ydaO	1739826	1740761	1	204	0.101496	936	95	conserved hypothetical protein	not required
STMMW_16511	dbpA	1740805	1742178	-1	193	0.0545852	1374	75	ATP-independent RNA helicase (DbpA)	ambiguous
STMMW_16521	zntB	1742665	1743648	-1	151	0.070122	984	69	putative membrane transport protein	ambiguous
STMMW_16531	STMMW_16531	1743794	1744948	-1	302	0.105628	1155	122	putative chemo-receptor protein	not required
STMMW_16541	ydaL	1745359	1745922	-1	345	0.262411	564	148	conserved hypothetical protein	not required
STMMW_16551	ogt	1746180	1746695	1	87	0.0775194	516	40	O6-methylguanine-DNA-alkyltransferase	ambiguous
STMMW_16561	fnr	1746849	1747643	1	116	0.0679245	795	54	fumarate and nitrate reduction regulatory protein	ambiguous
STMMW_16571	ydaA	1747794	1748741	1	172	0.0843882	948	80	conserved hypothetical protein	not required
STMMW_16581	ynaJ	1748796	1749050	-1	79	0.109804	255	28	putative membrane protein	not required
STMMW_16591	ynaI	1749289	1750320	1	262	0.138566	1032	143	putative membrane protein	not required
STMMW_16601	STMMW_16601	1750406	1751008	-1	87	0.0878939	603	53	conserved hypothetical DNA-binding protein	not required
STMMW_16611	STMMW_16611	1751052	1751738	1	139	0.069869	687	48	conserved hypothetical protein	ambiguous
STMMW_16621	STMMW_16621	1752210	1752767	-1	23	0.0232975	558	13	putative thiol peroxidase	required
STMMW_16631	STMMW_16631	1752866	1753696	-1	42	0.0361011	831	30	putative exported protein	required
STMMW_16641	STMMW_16641	1753717	1755699	-1	502	0.110943	1983	220	invasin-like protein	not required
STMMW_16651	STMMW_16651	1755774	1756619	-1	186	0.119385	846	101	putative lipoprotein	not required
STMMW_16661	STMMW_16661	1756919	1757771	1	5	0.00586166	853	5	putative transcriptional regulator (Pseudogene)	required
STMMW_16671	STMMW_16671	1758162	1759271	1	224	0.105405	1110	117	hypothetical protein	not required
STMMW_16681	STMMW_16681	1759485	1759739	-1	130	0.27451	255	70	putative lipoprotein	not required
STMMW_16691	STMMW_16691	1759850	1760440	-1	101	0.0812183	591	48	putative transcriptional regulator	not required
STMMW_16701	STMMW_16701	1760518	1761231	1	112	0.0630252	714	45	putative oxidoreductase	ambiguous
STMMW_16711	STMMW_16711	1761322	1762191	-1	163	0.0862069	870	75	putative oxidoreductase	not required
STMMW_16721	STMMW_16721	1762465	1763370	-1	137	0.0838852	906	76	putative transcriptional regulator	not required
STMMW_16731	STMMW_16731	1763489	1764418	1	264	0.105376	930	98	putative oxidoreductase	not required
STMMW_16741	mppA	1764515	1766128	-1	557	0.174102	1614	281	periplasmic murein peptide-binding protein MppA	not required
STMMW_16751	ycjI	1766318	1767046	1	148	0.0877915	729	64	conserved hypothetical protein	not required
STMMW_16761	ycjG	1767021	1767986	-1	122	0.047619	966	46	putative mandelate racemase / muconate lactonizing enzyme family protein	required
STMMW_16771	tpx	1768102	1768608	1	114	0.100592	507	51	Probable thiol peroxidase	not required
STMMW_16781	tyrR	1768698	1770239	-1	117	0.0350195	1542	54	transcriptional regulatory protein TyrR	required
STMMW_16791	ycjF	1770387	1771448	-1	209	0.0753296	1062	80	putative membrane protein	ambiguous
STMMW_16801	ycjX	1771445	1772848	-1	313	0.0990028	1404	139	putative ATP-binding protein	not required
STMMW_16811	pspE	1772991	1773305	-1	202	0.285714	315	90	phage shock protein E precursor	not required
STMMW_16821	pspD	1773381	1773599	-1	97	0.242009	219	53	phage shock protein D	not required
STMMW_16831	pspC	1773622	1773981	-1	85	0.113889	360	41	phage shock protein C	not required
STMMW_16841	pspB	1773981	1774205	-1	63	0.106667	225	24	phage shock protein B	not required
STMMW_16851	pspA	1774265	1774933	-1	65	0.0627803	669	42	phage shock protein A	ambiguous
STMMW_16861	pspF	1775104	1776084	1	230	0.0377166	981	37	psp operon transcriptional activator PspF	required
STMMW_16871	sapA	1776196	1777845	1	70	0.0260606	1650	43	peptide transport periplasmic protein SapA precursor	required
STMMW_16881	sapB	1778013	1778807	1	45	0.0251572	795	20	peptide transport system permease protein SapB	required
STMMW_16891	sapC	1778794	1779684	1	34	0.0179574	891	16	peptide transport system permease protein SapC	required
STMMW_16901	sapD	1779684	1780676	1	20	0.0140987	993	14	peptide transport system ATP-binding protein SapD	required
STMMW_16911	sapF	1780678	1781484	1	55	0.0384139	807	31	peptide transport system ATP-binding protein SapF	required
STMMW_16921	STMMW_16921	1781500	1782207	-1	57	0.0338983	708	24	conserved hypothetical protein	required
STMMW_16931	steC	1782674	1784047	-1	61	0.0225619	1374	31	hypothetical protein	required
STMMW_16941	STMMW_16941	1784082	1784261	1	0	0	180	0	conserved hypothetical protein	required
STMMW_16951	ycjE	1784236	1784535	1	148	0.243333	300	73	conserved hypothetical protein	not required
STMMW_16961	fabI	1784653	1785441	1	1	0.00126743	789	1	enoyl-[acyl-carrier-protein] reductase (NADH)	required
STMMW_16971	yciW	1785641	1786774	1	207	0.0723104	1134	82	conserved hypothetical protein	ambiguous
STMMW_16981	rnb	1786863	1788797	1	326	0.0739018	1935	143	RNase II	ambiguous
STMMW_16991	yciR	1789059	1791041	1	283	0.068583	1983	136	conserved hypothetical protein	ambiguous
STMMW_16992	STMMW_16992	1791163	1791342	1	64	0.172222	180	31	hypothetical protein	not required
STMMW_17001	yciT	1791429	1792181	1	192	0.0863214	753	65	putative regulatory protein	not required
STMMW_17002	osmB	1792440	1792658	1	94	0.173516	219	38	osmotically inducible lipoprotein B precursor	not required
STMMW_17011	yciH	1792778	1793104	-1	49	0.100917	327	33	putative translation initiaiton factor	not required
STMMW_17021	pyrF	1793104	1793841	-1	93	0.0596206	738	44	OMP decarboxylase	ambiguous
STMMW_17031	yciM	1794032	1795147	-1	7	0.00358423	1116	4	conserved hypothetical protein	required
STMMW_17041	yciS	1795208	1795516	-1	19	0.0485437	309	15	putative membrane protein	required
STMMW_17051	pgpB	1795666	1796430	-1	153	0.0836601	765	64	phosphatidylglycerophosphatase B	not required
STMMW_17061	ribA	1796626	1797216	1	5	0.00846024	591	5	GTP cyclohydrolase II	required
STMMW_17071	acnA	1797272	1799947	-1	679	0.105007	2676	281	aconitate hydratase 1 (citrate hydro-lyase 1)	not required
STMMW_17072	ymiA	1800503	1800631	-1	14	0.0310078	129	4	hypothetical protein	required
STMMW_17081	cysB	1800924	1801898	-1	58	0.04	975	39	cys regulon transcriptional activator	required
STMMW_17101	topA	1802309	1804906	-1	15	0.00500385	2598	13	DNA topoisomerase I, omega protein I	required
STMMW_17111	yciN	1805309	1805560	1	30	0.0595238	252	15	conserved hypothetical protein	ambiguous
STMMW_17121	sohB	1805602	1806648	-1	229	0.108883	1047	114	putative protease	not required
STMMW_17131	yciK	1806886	1807647	1	196	0.0971129	762	74	hypothetical oxidoreductase	not required
STMMW_17141	btuR	1807644	1808234	1	119	0.0879865	591	52	COB(I) alamin adenosyltransferase	not required
STMMW_17151	yciL	1808321	1809196	-1	60	0.0399543	876	35	putative pseudouridine synthase	required
STMMW_17161	yciO	1809297	1809917	-1	122	0.0869565	621	54	conserved hypothetical protein	not required
STMMW_17171	trpH	1809925	1810806	-1	181	0.0929705	882	82	conserved hypothetical protein	not required
STMMW_17181	trpE	1811067	1812629	1	366	0.100448	1563	157	anthranilate synthase component I	not required
STMMW_17191	trpD	1812629	1814224	1	481	0.126566	1596	202	anthranilate phosphoribosyltransferase	not required
STMMW_17201	trpC	1814228	1815586	1	285	0.0912436	1359	124	IGPS	not required
STMMW_17211	trpB	1815596	1816789	1	245	0.0929648	1194	111	tryptophan synthase beta chain	not required
STMMW_17221	trpA	1816789	1817595	1	148	0.0817844	807	66	tryptophan synthase alpha chain	not required
STMMW_17231	yciG	1818075	1818257	1	0	0	183	0	conserved hypothetical protein	required
STMMW_17241	yciF	1818347	1818850	1	39	0.0376984	504	19	conserved hypothetical protein	required
STMMW_17251	yciE	1818924	1819430	1	29	0.0473373	507	24	conserved hypothetical protein	required
STMMW_17261	katN	1819450	1820328	1	360	0.163823	879	144	conserved hypothetical protein	not required
STMMW_17271	ompW	1820410	1821048	-1	92	0.0907668	639	58	putative outer membrane protein	not required
STMMW_17281	STMMW_17281	1821386	1821790	1	117	0.123457	405	50	conserved hypothetical protein	not required
STMMW_17291	yciC	1821816	1822559	1	229	0.120968	744	90	putative membrane protein	not required
STMMW_17301	ispZ	1822616	1823155	1	67	0.0722222	540	39	Probable intracellular septation protein	ambiguous
STMMW_17311	yciA	1823316	1823717	1	85	0.114428	402	46	putative Acyl-CoA hydrolase	not required
STMMW_17321	tonB	1823777	1824505	-1	24	0.0274348	729	20	TonB protein	required
STMMW_17331	yciI	1824729	1825025	1	49	0.0841751	297	25	conserved hypothetical protein	not required
STMMW_17341	cls	1825385	1826845	1	381	0.102669	1461	150	CL synthase	not required
STMMW_17351	yciU	1826879	1827208	1	40	0.0727273	330	24	conserved hypothetical protein	ambiguous
STMMW_17361	STMMW_17361	1827256	1828038	-1	339	0.182631	783	143	possible ion transport protein	not required
STMMW_17371	oppF	1828140	1829144	-1	264	0.111443	1005	112	oligopeptide transport ATP-binding protein (OppF)	not required
STMMW_17381	oppD	1829141	1830148	-1	362	0.128968	1008	130	oligopeptide transport ATP-binding protein (OppD)	not required
STMMW_17391	oppC	1830160	1831068	-1	338	0.147415	909	134	oligopeptide transport system permease protein (OppC)	not required
STMMW_17401	oppB	1831083	1832003	-1	174	0.100977	921	93	oligopeptide transport system permease protein (OppB)	not required
STMMW_17411	oppA	1832125	1833873	-1	772	0.193253	1749	338	periplasmic oligopeptide-binding protein precursor (OppA)	not required
STMMW_17421	STMMW_17421	1833824	1834138	1	182	0.244444	315	77	conserved hypothetical protein	not required
STMMW_17431	ychE	1834521	1835168	-1	175	0.179012	648	116	putative membrane protein	not required
STMMW_17441	adh	1835645	1838323	1	463	0.0716685	2679	192	alcohol dehydrogenase	ambiguous
STMMW_17451	tdk	1838520	1839137	-1	352	0.23301	618	144	thymidine kinase	not required
STMMW_17461	hns	1839800	1840213	1	1	0.00241546	414	1	DNA-binding protein (histone-like protein Hlp- II)	required
STMMW_17471	galU	1840345	1841253	-1	24	0.0220022	909	20	glucose-1-phosphate uridylyltransferase	required
STMMW_17481	hnr	1841456	1842469	-1	13	0.00887574	1014	9	putative regulatory protein	required
STMMW_17491	ychK	1842560	1843465	-1	148	0.102649	906	93	conserved hypothetical protein	not required
STMMW_17501	ychJ	1843576	1844034	1	158	0.159041	459	73	Hypothetical UPF0225 protein	not required
STMMW_17511	purU	1844085	1844927	1	248	0.143535	843	121	formyltetrahydrofolate deformylase	not required
STMMW_17521	STMMW_17521	1846243	1847718	-1	370	0.112466	1476	166	putative secreted protein	not required
STMMW_17531	narI	1848014	1848691	-1	356	0.225664	678	153	respiratory nitrate reductase 1 gamma chain	not required
STMMW_17541	narJ	1848691	1849401	-1	412	0.243319	711	173	respiratory nitrate reductase 1 delta chain	not required
STMMW_17551	narH	1849398	1850933	-1	855	0.218099	1536	335	respiratory nitrate reductase 1 beta chain	not required
STMMW_17561	narG	1850930	1854673	-1	2299	0.222222	3744	832	respiratory nitrate reductase 1 alpha chain	not required
STMMW_17571	narK	1855061	1856458	-1	535	0.151645	1398	212	nitrite extrusion protein (nitrite facilitator)	not required
STMMW_17581	narX	1856799	1858595	1	817	0.182526	1797	328	nitrate/nitrite sensor protein NarX	not required
STMMW_17591	narL	1858588	1859238	1	249	0.144393	651	94	nitrate/nitrite response regulator protein NarL	not required
STMMW_17601	ychP	1859239	1860663	-1	395	0.116491	1425	166	putative invasin	not required
STMMW_17611	ychN	1860840	1861193	1	51	0.0706215	354	25	conserved hypothetical protein	ambiguous
STMMW_17621	chaB	1861273	1861503	-1	54	0.116883	231	27	cation transport regulator ChaB	not required
STMMW_17631	chaA	1861770	1862870	1	395	0.180745	1101	199	putative calcium/proton antiporter	not required
STMMW_17641	kdsA	1862924	1863778	-1	12	0.0128655	855	11	2-dehydro-3-deoxyphosphooctonate aldolase	required
STMMW_17651	ychA	1863816	1864625	-1	115	0.091358	810	74	putative regulator	not required
STMMW_17661	sirC	1864629	1865018	-1	161	0.207692	390	81	putative regulator	not required
STMMW_17671	hemK	1865015	1865848	-1	165	0.0839329	834	70	HemK protein, putative protoporphyrinogen oxidase	not required
STMMW_17681	prfA	1865848	1866930	-1	4	0.00369344	1083	4	RF-1	required
STMMW_17691	hemA	1866971	1868227	-1	2	0.00159109	1257	2	GluTR	required
STMMW_17701	hemM	1868541	1869164	1	3	0.00160256	624	1	outer membrane lipoprotein	required
STMMW_17711	ipk	1869161	1870012	1	2	0.00234742	852	2	4-diphosphocytidyl-2-C-methyl-D-erythritol kinase	required
STMMW_17721	prs	1870278	1871225	1	56	0.0179325	948	17	ribose-phosphate pyrophosphokinase	required
STMMW_17731	ychM	1871374	1873035	1	347	0.0920578	1662	153	putative sulphate transporter	not required
STMMW_17741	ychH	1873080	1873358	-1	46	0.0824373	279	23	putative exported protein	not required
STMMW_17751	pth	1873610	1874218	1	13	0.0164204	609	10	PTH	required
STMMW_17761	ychF	1874335	1875426	1	141	0.0595238	1092	65	putative ATP/GTP-binding protein	ambiguous
STMMW_17771	STMMW_17771	1875585	1876850	-1	91	0.049763	1266	63	conserved hypothetical protein	required
STMMW_17781	hyaA	1877345	1878463	1	212	0.0929401	1119	104	hydrogenase-1 small subunit	not required
STMMW_17791	STMMW_17791	1878460	1880253	1	540	0.14437	1794	259	hydrogenase-1 large chain (nifE hydrogenase)	not required
STMMW_17801	hyaC	1880272	1881003	1	372	0.18306	732	134	probable Ni/Fe-hydrogenase 1 b-type cytochrome subunit	not required
STMMW_17811	hyaD	1881000	1881596	1	269	0.174204	597	104	hydrogenase-1 operon protein HyaD	not required
STMMW_17821	hyaE	1881586	1881990	1	214	0.187654	405	76	hydrogenase-1 operon protein HyaE	not required
STMMW_17831	hyaF	1881987	1882835	1	639	0.234393	849	199	hydrogenase-1 operon protein HyaF	not required
STMMW_17841	appC	1882910	1884454	1	562	0.151456	1545	234	cytochrome bd-II oxidase subunit I (pseudogene)	not required
STMMW_17851	appB	1884466	1885602	1	480	0.137203	1137	156	probable cytochrome oxidase subunit II	not required
STMMW_17861	STMMW_17861	1885615	1885704	1	56	0.166667	90	15	hypothetical protein	not required
STMMW_17871	STMMW_17871	1886048	1887373	1	517	0.134992	1326	179	glutamate dehydrogenase	not required
STMMW_17881	treA	1887587	1889299	1	451	0.110917	1713	190	Alpha,alpha-trehalase	not required
STMMW_17891	ymgE	1889362	1889616	-1	84	0.152941	255	39	putative membrane protein	not required
STMMW_17901	ycgR	1889785	1890519	1	194	0.112925	735	83	conserved hypothetical protein	not required
STMMW_17911	emtA	1890533	1891144	-1	173	0.143791	612	88	membrane-bound lytic murein transglycosylase E	not required
STMMW_17921	ldcA	1891315	1892229	1	229	0.107104	915	98	conserved hypothetical protein	not required
STMMW_17931	cvrA	1892326	1894059	1	580	0.134948	1734	234	Cell volume regulation protein A. Cell volume regulation protein A homolog	not required
STMMW_17941	alra	1894122	1895192	-1	338	0.103641	1071	111	alanine racemase	not required
STMMW_17951	dadA	1895206	1896504	-1	418	0.141647	1299	184	D-amino acid dehydrogenase	not required
STMMW_17961	ycgB	1896827	1898359	1	613	0.172211	1533	264	conserved hypothetical protein	not required
STMMW_17971	fadR	1898406	1899125	-1	132	0.0916667	720	66	Fatty acid metabolism regulator protein	not required
STMMW_17981	nhaB	1899345	1900889	1	554	0.146926	1545	227	Na /H antiporter	not required
STMMW_17991	dsbB	1901031	1901561	1	188	0.135593	531	72	Disulfide oxidoreductase	not required
STMMW_18001	STMMW_18001	1901670	1902011	1	89	0.111111	342	38	conserved hypothetical protein	not required
STMMW_18011	STMMW_18011	1902083	1902256	-1	18	0.0632184	174	11	conserved hypothetical protein	ambiguous
STMMW_18021	STMMW_18021	1902448	1902585	-1	38	0.144928	138	20	hypothetical protein	not required
STMMW_18031	ycgN	1902937	1903398	-1	139	0.15368	462	71	Hypothetical UPF0260 protein <ORFName>	not required
STMMW_18041	ycgM	1903476	1904135	-1	249	0.142424	660	94	putative hydrolase	not required
STMMW_18051	ycgL	1904185	1904517	-1	107	0.168168	333	56	conserved hypothetical protein	not required
STMMW_18061	minC	1904604	1905311	1	305	0.165254	708	117	Probable septum site-determining protein minC	not required
STMMW_18071	minD	1905335	1906147	1	311	0.115621	813	94	septum site determining protein	not required
STMMW_18081	minE	1906151	1906417	1	34	0.0374532	267	10	Cell division topological specificity factor	required
STMMW_18091	rnd	1906539	1907666	-1	319	0.140071	1128	158	Ribonuclease D	not required
STMMW_18092	tnpA_1a	1907802	1908131	-1	2047	0.854545	330	282	mobile element protein	not required
STMMW_18101	fadD	1908451	1910136	-1	458	0.123369	1686	208	long-chain-fatty-acid--CoA ligase	not required
STMMW_18111	yeaY	1910341	1910922	-1	167	0.130584	582	76	putative lipoprotein	not required
STMMW_18121	yeaZ	1910994	1911689	-1	21	0.0244253	696	17	conserved hypothetical protein	required
STMMW_18131	yoaA	1911747	1913657	-1	728	0.136054	1911	260	putative ATP-dependent helicase	not required
STMMW_18141	yoaB	1913788	1914132	1	129	0.130435	345	45	conserved hypothetical protein	not required
STMMW_18151	yoaH	1914138	1914317	-1	66	0.211111	180	38	Hypothetical UPF0181 protein <ORFName>	not required
STMMW_18161	pabB	1914398	1915762	1	576	0.153114	1365	209	para-aminobenzoate synthase component I	not required
STMMW_18171	yeaB	1915766	1916344	1	276	0.151986	579	88	conserved hypothetical protein	not required
STMMW_18181	sdaA	1916608	1917972	1	563	0.156044	1365	213	L-serine deaminase 1	not required
STMMW_18191	STMMW_18191	1918008	1919711	1	800	0.180751	1704	308	conserved hypothetical protein	not required
STMMW_18201	yoaE	1919733	1921292	-1	888	0.216026	1560	337	putative membrane protein	not required
STMMW_18211	STMMW_18211	1921280	1921615	-1	123	0.178571	336	60	conserved hypothetical protein	not required
STMMW_18221	manX	1921765	1922733	1	316	0.148607	969	144	PTS system, mannose-specific IIab component	not required
STMMW_18231	manY	1922786	1923586	1	331	0.141074	801	113	phosphotransferase enzyme II, C component	not required
STMMW_18241	manZ	1923590	1924450	1	349	0.15331	861	132	phosphotransferase enzyme II, D component	not required
STMMW_18251	STMMW_18251	1924508	1924966	1	161	0.148148	459	68	putative membrane protein	not required
STMMW_18261	yebN	1925376	1925942	1	152	0.114638	567	65	putative membrane protein	not required
STMMW_18271	rrmA	1925939	1926748	-1	298	0.141975	810	115	rRNA guanine-N1-methyltransferase	not required
STMMW_18281	ftsI2	1926814	1928559	-1	472	0.112257	1746	196	penicillin-binding protein	not required
STMMW_18291	cspC	1928779	1928988	-1	203	0.242857	210	51	cold shock-like protein CspC	not required
STMMW_18292	yobF	1929001	1929144	-1	85	0.256944	144	37	hypothetical protein	not required
STMMW_18293	STMMW_18293	1929793	1930080	-1	42	0.0659722	288	19	hypothetical protein	ambiguous
STMMW_18294	yobG	1930151	1930294	-1	105	0.291667	144	42	putative inner membrane protein	not required
STMMW_18301	STMMW_18301	1930452	1930691	1	329	0.4	240	96	putative exported protein	not required
STMMW_18311	kdgR	1930903	1931694	-1	459	0.27904	792	221	transcriptional regulator KdgR	not required
STMMW_18321	STMMW_18321	1931870	1933243	1	479	0.149927	1374	206	putative membrane transport protein	not required
STMMW_18331	htpX	1933291	1934172	-1	274	0.143991	882	127	heat shock protein	not required
STMMW_18341	prc	1934366	1936414	-1	478	0.119571	2049	245	tail-specific protease precursor	not required
STMMW_18351	proQ	1936434	1937120	-1	171	0.128093	687	88	ProP effector	not required
STMMW_18361	yebR	1937218	1937802	-1	191	0.160684	585	94	conserved hypothetical protein	not required
STMMW_18371	yebS	1937844	1939127	1	575	0.187695	1284	241	putative membrane protein	not required
STMMW_18381	STMMW_18381	1939096	1941729	1	1776	0.23956	2634	631	putative membrane protein	not required
STMMW_18391	yebU	1941807	1943246	1	581	0.163889	1440	236	conserved hypothetical protein	not required
STMMW_18401	STMMW_18401	1943361	1943600	1	65	0.104167	240	25	conserved hypothetical protein	not required
STMMW_18411	yebW	1943711	1943902	1	109	0.223958	192	43	putative secreted protein	not required
STMMW_18421	pphA	1943921	1944571	-1	217	0.129032	651	84	serine/threonine protein phosphatase 1	not required
STMMW_18431	STMMW_18431	1944795	1944959	-1	204	0.509091	165	84	hypothetical protein	not required
STMMW_18441	sopE2	1945244	1945966	-1	16	0.0179806	723	13	invasion-associated secreted effector protein (sopE2)	required
STMMW_18451	STMMW_18451	1946650	1947045	1	10	0.0252525	396	10	conserved hypothetical protein	required
STMMW_18461	STMMW_18461	1947073	1947243	1	262	0.596491	171	102	hypothetical protein	not required
STMMW_18471	STMMW_18471	1947375	1947851	1	369	0.32914	477	157	putative membrane protein	not required
STMMW_18481	STMMW_18481	1948239	1948658	-1	171	0.22381	420	94	putative acetyltransferase	not required
STMMW_18491	STMMW_18491	1949028	1949297	1	69	0.107407	270	29	conserved hypothetical protein	not required
STMMW_18511	STMMW_18511	1949440	1949715	1	293	0.376812	276	104	conserved hypothetical protein	not required
STMMW_18521	STMMW_18521	1949752	1950943	-1	443	0.163591	1192	195	transposase (pseudogene)	not required
STMMW_18531	STMMW_18531	1951016	1951435	1	228	0.197619	420	83		not required
STMMW_18541	STMMW_18541	1951809	1952162	-1	156	0.186441	354	66	putative exported protein	not required
STMMW_18551	STMMW_18551	1952179	1953054	-1	460	0.202055	876	177	putative cation transporter	not required
STMMW_18561	yobA	1953055	1953429	-1	224	0.242667	375	91	putative cation resistance protein	not required
STMMW_18571	holE	1953567	1953797	1	124	0.21645	231	50	DNA polymerase iii, theta subunit	not required
STMMW_18581	STMMW_18581	1953905	1954561	1	512	0.275495	657	181	conserved hypothetical protein	not required
STMMW_18591	exoX	1954585	1955283	1	412	0.243205	699	170	exodeoxyribonuclease X	not required
STMMW_18601	opdB	1955318	1957369	-1	1183	0.230019	2052	472	oligopeptidase	not required
STMMW_18611	yebE	1957582	1958241	-1	471	0.304545	660	201	putative membrane protein	not required
STMMW_18621	yebF	1958335	1958688	-1	226	0.305085	354	108	putative exported protein	not required
STMMW_18631	yebG	1958756	1959046	-1	89	0.134021	291	39	conserved hypothetical protein	not required
STMMW_18641	purT	1959177	1960355	1	880	0.237489	1179	280	phosphoribosylglycinamide formyltransferase 2	not required
STMMW_18651	eda	1960455	1961096	-1	151	0.126168	642	81	KHG/KDPG aldolase	not required
STMMW_18661	edd	1961134	1962945	-1	985	0.201435	1812	365	6-phosphogluconate dehydratase	not required
STMMW_18671	zwf	1963180	1964655	-1	457	0.157859	1476	233	glucose 6-phosphate dehydrogenase	not required
STMMW_18681	hexR	1964997	1965866	1	351	0.170115	870	148	putative transcriptional repressor	not required
STMMW_18691	pykA	1965990	1967432	1	439	0.111573	1443	161	pyruvate kinase A	not required
STMMW_18701	msbB	1967505	1968476	-1	11	0.00617284	972	6	lipid A acyltransferase	required
STMMW_18711	yebA	1968593	1969912	-1	797	0.215909	1320	285	conserved hypothetical protein	not required
STMMW_18721	znuA	1969928	1970929	-1	371	0.175649	1002	176	high-affinity zinc uptake system periplasmic binding protein	not required
STMMW_18731	znuC	1970900	1971706	1	382	0.158612	807	128	high-affinity zinc uptake system ATP-binding protein	not required
STMMW_18741	znuB	1971703	1972488	1	359	0.181934	786	143	high-affinity zinc uptake system membrane protein	not required
STMMW_18751	ruvB	1972567	1973496	-1	227	0.117204	930	109	Holliday junction DNA helicase	not required
STMMW_18761	ruvA	1973586	1974197	-1	103	0.101307	612	62	Holliday junction DNA helicase	not required
STMMW_18771	STMMW_18771	1974530	1975509	1	43	0.0295918	980	29	conserved hypothetical protein (pseudogene)	required
STMMW_18791	STMMW_18791	1975573	1976006	-1	3	0.00460829	434	2	conserved hypothetical protein (pseudogene)	required
STMMW_18801	yebB	1976139	1976738	1	545	0.33	600	198	conserved hypothetical protein	not required
STMMW_18811	ruvC	1976740	1977261	-1	48	0.0670498	522	35	Crossover junction endodeoxyribonuclease ruvC	ambiguous
STMMW_18821	yebC	1977298	1978038	-1	189	0.11336	741	84	conserved hypothetical protein	not required
STMMW_18831	ntpA	1978068	1978520	-1	190	0.172185	453	78	DATP pyrophosphohydrolase	not required
STMMW_18841	aspS	1978623	1980395	-1	82	0.00958827	1773	17	AspRS	required
STMMW_18851	yecD	1980720	1981286	1	281	0.176367	567	100	putative hydrolase	not required
STMMW_18861	yecE	1981283	1982101	1	385	0.169719	819	139	conserved hypothetical protein	not required
STMMW_18871	yecN	1982154	1982549	1	207	0.234848	396	93	putative membrane protein	not required
STMMW_18881	yecO	1982590	1983333	1	454	0.231183	744	172	conserved hypothetical protein	not required
STMMW_18891	yecP	1983330	1984301	1	687	0.196502	972	191	conserved hypothetical protein	not required
STMMW_18901	cutC	1984537	1985283	-1	305	0.16332	747	122	putative copper homeostasis protein	not required
STMMW_18911	yecM	1985303	1985872	-1	317	0.203509	570	116	conserved hypothetical protein	not required
STMMW_18921	argS	1986109	1987842	1	63	0.00576701	1734	10	ArgRS	required
STMMW_18931	STMMW_18931	1988031	1989902	1	1360	0.255342	1872	478	penicillin-binding protein	not required
STMMW_18941	STMMW_18941	1989956	1991095	-1	756	0.248246	1140	283	conserved hypothetical protein	not required
STMMW_18951	flhE	1991332	1991724	-1	145	0.155216	393	61	flagellar protein FlhE precursor	not required
STMMW_18961	flhAa	1991724	1993802	-1	1439	0.233285	2079	485	flagellar biosynthesis protein FlhA	not required
STMMW_18971	flhB	1993795	1994946	-1	691	0.244792	1152	282	flagellar biosynthetic protein FlhB	not required
STMMW_18981	cheZ	1995140	1995784	-1	501	0.27907	645	180	chemotaxis protein CheZ	not required
STMMW_18991	cheY	1995795	1996184	-1	96	0.117949	390	46	chemotaxis protein CheY	not required
STMMW_19001	cheB	1996202	1997251	-1	511	0.168571	1050	177	Chemotaxis response regulator protein-glutamate methylesterase	not required
STMMW_19011	cheR	1997248	1998114	-1	535	0.229527	867	199	chemotaxis protein methyltransferase	not required
STMMW_19021	cheM	1998268	2000160	-1	816	0.178553	1893	338	methyl-accepting chemotaxis protein II	not required
STMMW_19031	cheW	2000166	2000669	-1	324	0.248016	504	125	purine binding chemotaxis protein	not required
STMMW_19041	cheA	2000690	2002705	-1	971	0.195933	2016	395	chemotaxis protein CheA	not required
STMMW_19051	motB	2002710	2003639	-1	379	0.173118	930	161	motility protein B	not required
STMMW_19061	motA	2003636	2004466	-1	382	0.169675	831	141	motility protein A	not required
STMMW_19071	flhC	2004647	2005231	-1	516	0.311111	585	182	flagellar transcriptional activator	not required
STMMW_19081	flhD	2005228	2005578	-1	296	0.293447	351	103	Transcriptional activator flhD	not required
STMMW_19091	STMMW_19091	2006252	2006368	1	86	0.230769	117	27	conserved hypothetical protein	not required
STMMW_19101	yecG	2006365	2006793	1	253	0.2331	429	100	conserved hypothetical protein	not required
STMMW_19111	otsA	2006811	2008232	-1	1016	0.277778	1422	395	trehalose-6-phosphate synthase	not required
STMMW_19121	otsB	2008207	2009010	-1	420	0.221393	804	178	trehalose phosphatase	not required
STMMW_19131	araH	2009644	2010201	-1	465	0.301075	558	168	conserved hypothetical protein	not required
STMMW_19141	ftnB	2010752	2011255	1	510	0.325397	504	164	ferritin-like protein	not required
STMMW_19151	STMMW_19151	2011434	2012072	-1	183	0.114241	639	73	Putative sugar phosphate isomerase	not required
STMMW_19161	STMMW_19161	2012328	2012663	1	258	0.291667	336	98	putative lipoprotein	not required
STMMW_19171	ftn	2012903	2013400	1	837	0.423695	498	211	ferritin	not required
STMMW_19181	yecH	2013446	2013685	-1	95	0.1875	240	45	conserved hypothetical protein	not required
STMMW_19191	tyrP	2013912	2015123	1	304	0.109736	1212	133	tyrosine-specific transport protein	not required
STMMW_19201	yecA	2015198	2015863	-1	239	0.148649	666	99	conserved hypothetical protein	not required
STMMW_19211	STMMW_19211	2016101	2016427	-1	197	0.275229	327	90	conserved hypothetical protein	not required
STMMW_19221	STMMW_19221	2016640	2018079	-1	1467	0.364583	1440	525	putative exported protein (pseudogene)	not required
STMMW_19231	STMMW_19231	2018292	2018624	-1	65	0.138138	333	46	putative membrane protein	not required
STMMW_19232	STMMW_19232	2018670	2018797	-1	80	0.390625	128	50	conserved hypothetical protein (pseudogene)	not required
STMMW_19241	pgsA	2019325	2019873	-1	1	0.00182149	549	1	phosphotidylglycerophosphate synthetase	required
STMMW_19251	uvrC	2019930	2021762	-1	897	0.198036	1833	363	Excinuclease ABC subunit C	not required
STMMW_19261	sirA	2021759	2022415	-1	1119	0.439878	657	289	invasion response-regulator	not required
STMMW_19262	STMMW_19262	2022478	2022555	-1	47	0.217949	78	17	hypothetical protein	not required
STMMW_19271	STMMW_19271	2022727	2022882	1	86	0.237179	156	37	putative inner membrane protein	not required
STMMW_19281	yecF	2022879	2023103	1	301	0.408889	225	92	conserved hypothetical protein	not required
STMMW_19291	sdiA	2023170	2023892	-1	731	0.345781	723	250	cell-division regulatory protein	not required
STMMW_19301	yecC	2024124	2024876	-1	521	0.264276	753	199	putative ABC-transport ATP-binding protein	not required
STMMW_19311	yecS	2024873	2025541	-1	195	0.176383	669	118	putative ABC transporter membrane protein	not required
STMMW_19321	dcyD	2025562	2026548	-1	737	0.266464	987	263	D-cysteine desulfhydrase	not required
STMMW_19331	fliY	2026702	2027502	-1	419	0.220974	801	177	cystine-binding periplasmic protein (FliY)	not required
STMMW_19341	fliZ	2027649	2028200	-1	306	0.237319	552	131	regulatory protein (FliZ)	not required
STMMW_19351	fliA	2028259	2028978	-1	677	0.301389	720	217	RNA polymerase sigma transcription factor for flagellar operon	not required
STMMW_19361	tnpA_2b	2029247	2029705	-1	2981	0.862745	459	396	transposase for insertion sequence element IS200	not required
STMMW_19371	fliB	2029886	2031091	-1	912	0.293532	1206	354	lysine-N-methylase (ec 2.1.1.-) (lysine N- methyltransferase)	not required
STMMW_19381	fliC	2031170	2032657	-1	1367	0.364919	1488	543	flagellin	not required
STMMW_19401	fliD	2032914	2034317	1	695	0.188034	1404	264	flagellar hook associated protein (FliD)	not required
STMMW_19411	fliS	2034332	2034739	1	116	0.117647	408	48	flagellar protein FliS	not required
STMMW_19421	fliT	2034739	2035107	1	139	0.203252	369	75	flagellar protein FliT	not required
STMMW_19431	amyA	2035179	2036663	1	538	0.153535	1485	228	cytoplasmic alpha-amylase	not required
STMMW_19441	yedD	2036703	2037116	-1	279	0.246377	414	102	putative lipoprotein	not required
STMMW_19451	yedE	2037242	2038507	1	617	0.179305	1266	227	putative membrane protein	not required
STMMW_19461	yedF	2038504	2038737	1	191	0.192308	234	45	conserved hypothetical protein	not required
STMMW_19471	STMMW_19471	2039002	2039388	1	186	0.268734	387	104	putative exported protein	not required
STMMW_19481	fliE	2039508	2039822	-1	167	0.257143	315	81	flagellar hook-basal body complex protein FliE	not required
STMMW_19491	fliF	2040039	2041721	1	1358	0.233512	1683	393	flagellar basal-body M-ring protein	not required
STMMW_19501	fliG	2041714	2042709	1	745	0.257028	996	256	flagellar motor switch protein FliG	not required
STMMW_19511	fliH	2042681	2043409	1	731	0.312757	729	228	flagellar assembly protein FliH	not required
STMMW_19521	fliI	2043409	2044779	1	1087	0.253829	1371	348	flagellum-specific ATP synthase	not required
STMMW_19531	fliJ	2044801	2045244	1	235	0.198198	444	88	flagellar FliJ protein	not required
STMMW_19541	fliK	2045241	2046458	1	977	0.258621	1218	315	flagellar hook-length control protein	not required
STMMW_19551	fliL	2046563	2047030	1	267	0.247863	468	116	FliL protein	not required
STMMW_19561	fliM	2047035	2048039	1	465	0.195025	1005	196	flagellar motor switch protein FliM	not required
STMMW_19571	fliN	2048036	2048449	1	216	0.181159	414	75	flagellar motor switch protein FliN	not required
STMMW_19581	fliO	2048449	2048826	1	161	0.111111	378	42	flagellar protein FliO	not required
STMMW_19591	fliP	2048826	2049563	1	205	0.109756	738	81	flagellar biosynthetic protein FliP	not required
STMMW_19601	fliQ	2049573	2049842	1	218	0.22963	270	62	flagellar biosynthetic protein FliQ	not required
STMMW_19611	fliR	2049851	2050645	1	569	0.210063	795	167	flagellar biosynthetic protein FliR	not required
STMMW_19621	rcsA	2050927	2051550	1	322	0.221154	624	138	colanic acid capsullar biosynthesis activation protein A	not required
STMMW_19631	dsrB	2051589	2051786	-1	133	0.277778	198	55	DsrB protein	not required
STMMW_19641	yodD	2051912	2052139	1	75	0.114035	228	26	conserved hypothetical protein	not required
STMMW_19651	mngB	2052449	2053264	1	431	0.188725	816	154	MPGP	not required
STMMW_19661	gcpA	2053243	2054955	-1	1045	0.206071	1713	353	putative membrane protein	not required
STMMW_19671	STMMW_19671	2055120	2055365	-1	113	0.223577	246	55	conserved hypothetical protein	not required
STMMW_19681	yedI	2055382	2056293	-1	459	0.230263	912	210	conserved hypothetical integral membrane protein	not required
STMMW_19691	yedA	2056469	2057389	1	376	0.163952	921	151	putative membrane protein	not required
STMMW_19701	vsr	2057378	2057848	-1	128	0.125265	471	59	patch repair protein	not required
STMMW_19711	dcm	2057829	2059259	-1	508	0.160028	1431	229	DNA-cytosine methyltransferase	not required
STMMW_19721	yedJ	2059333	2060028	-1	211	0.117816	696	82	conserved hypothetical protein	not required
STMMW_19731	STMMW_19731	2060120	2060419	-1	162	0.233333	300	70	putative membrane protein	not required
STMMW_19741	ompS	2061070	2062275	1	700	0.232172	1206	280	outer membrane protein S1	not required
STMMW_19751	cspB	2062735	2062947	-1	36	0.0657277	213	14	cold shock protein	ambiguous
STMMW_19752	STMMW_19752	2063194	2063313	-1	16	0.108333	120	13	conserved hypothetical protein	not required
STMMW_19761	umuC	2063402	2064670	-1	387	0.1316	1269	167	DNA repair protein	not required
STMMW_19781	umuD	2064673	2065092	-1	189	0.178571	420	75	DNA repair protein	not required
STMMW_19791	STMMW_19791	2065219	2065380	-1	36	0.117284	162	19	conserved hypothetical protein	not required
STMMW_19801	STMMW_19801	2065358	2065600	-1	91	0.160494	243	39	putative membrane protein	not required
STMMW_19811	STMMW_19811	2066011	2066205	-1	275	0.4	195	78		not required
STMMW_19812	sseK3	2066445	2067452	1	27	0.015873	1008	16	predicted phage protein	required
STMMW_19831	STMMW_19831	2067737	2068306	-1	257	0.240351	570	137	putative phage tail protein	not required
STMMW_19841	STMMW_19841	2068306	2069868	-1	2540	0.495841	1563	775	putative phage tail fibre protein	not required
STMMW_19851	STMMW_19851	2069855	2070442	-1	420	0.251701	588	148	putative phage tail protein	not required
STMMW_19861	STMMW_19861	2070445	2070966	-1	267	0.208812	522	109	putative phage tail protein	not required
STMMW_19871	STMMW_19871	2071001	2071546	-1	368	0.241758	546	132	phage protein	not required
STMMW_19881	STMMW_19881	2071518	2071931	-1	176	0.171498	414	71	phage protein	not required
[truncated: 2,824 more rows]

## Sheet: b. LB (output)
locus_tag	gene_name	start	end	strand	read_count	ins_index	gene_length	ins_count	function	call
STMMW_00001	thrL	169	255	1	192	0.494253	87	43	thr operon leader peptide	not required
STMMW_00011	thrA	337	2799	1	1517	0.219651	2463	541	aspartokinase I/homoserine dehydrogenase I	not required
STMMW_00021	thrB	2801	3730	1	500	0.18172	930	169	HK	not required
STMMW_00031	thrC	3734	5020	1	579	0.180264	1287	232	threonine synthase	not required
STMMW_00041	yaaA	5114	5887	-1	329	0.197674	774	153	conserved hypothetical protein	not required
STMMW_00051	yaaJ	5966	7396	-1	397	0.127883	1431	183	putative amino-acid transport protein	not required
STMMW_00061	talB	7665	8618	1	351	0.162474	954	155	transaldolase B	not required
STMMW_00071	mog	8729	9319	1	229	0.143824	591	85	molybdopterin biosynthesis Mog protein	not required
STMMW_00081	yaaH	9376	9942	-1	269	0.15873	567	90	putative membrane protein	not required
STMMW_00091	htgA	10092	10805	-1	440	0.231092	714	165	conserved hypothetical protein	not required
STMMW_00101	yaaI	10841	11245	-1	250	0.234568	405	95	putative exported protein	not required
STMMW_00111	dnaK	11593	13509	1	266	0.0151278	1917	29	DnaK protein (heat shock protein 70)	required
STMMW_00121	dnaJ	13595	14734	1	257	0.0394737	1140	45	DNAJ protein	required
STMMW_00131	STMMW_00131	15014	15961	1	449	0.167722	948	159	putative regulatory protein	not required
STMMW_00141	STMMW_00141	16088	16432	1	34	0.0492754	345	17	putative phage protein	ambiguous
STMMW_00151	STMMW_00151	16493	17026	-1	552	0.363296	534	194	conserved hypothetical protein	not required
STMMW_00161	STMMW_00161	17043	17486	-1	121	0.0878378	444	39	putative membrane protein	not required
STMMW_00171	chiA	17867	19966	1	1005	0.200476	2100	421	putative chitinase	not required
STMMW_00181	STMMW_00181	20058	23054	1	1661	0.192192	2997	576	putative chitinase	not required
STMMW_00191	STMMW_00191	23335	24039	1	482	0.289362	705	204	conserved hypothetical protein	not required
STMMW_00201	bcfA	24469	25011	1	858	0.46593	543	253	fimbrial subunit	not required
STMMW_00211	bcfB	25112	25798	1	496	0.285298	687	196	fimbrial chaperone	not required
STMMW_00221	bcfC	25803	28424	1	1599	0.195652	2622	513	fimbrial usher protein	not required
STMMW_00231	bcfD	28425	29432	1	615	0.237103	1008	239	fimbrial subunit	not required
STMMW_00241	bcfE	29433	29978	1	194	0.144689	546	79	fimbrial subunit	not required
STMMW_00251	bcfF	29994	30512	1	236	0.183044	519	95	fimbrial subunit	not required
STMMW_00261	bcfG	30478	31209	1	400	0.192623	732	141	fimbrial chaperone	not required
STMMW_00271	bcfH	31274	32119	1	420	0.156028	846	132	putative exported protein	not required
STMMW_00281	STMMW_00281	32116	32445	1	240	0.20303	330	67	putative membrane protein	not required
STMMW_00291	STMMW_00291	32545	32994	-1	18	0.02	450	9	putative membrane protein	required
STMMW_00301	STMMW_00301	33364	34368	1	29	0.0248756	1005	25	putative transcriptional regulator (LysR family)	required
STMMW_00311	STMMW_00311	34376	34816	-1	27	0.0340136	441	15	putative transcriptional regulator	required
STMMW_00331	STMMW_00331	35339	37057	1	2731	0.463642	1719	797	possible sulfatase	not required
STMMW_00341	STMMW_00341	37103	38674	-1	1182	0.274809	1572	432	putative secreted 5'-nucleotidase	not required
STMMW_00351	STMMW_00351	38773	39534	-1	197	0.122047	762	93	putative exported protein	not required
STMMW_00361	STMMW_00361	40131	41624	1	1202	0.289157	1494	432	putative secreted sulfatase	not required
STMMW_00371	STMMW_00371	41723	42913	1	721	0.225861	1191	269	possible sulfatase regulatory protein	not required
STMMW_00381	STMMW_00381	42932	44185	1	1444	0.330144	1254	414	conserved hypothetical protein	not required
STMMW_00391	STMMW_00391	44312	46027	1	1962	0.368881	1716	633	possible sulfatase	not required
STMMW_00401	nhaA	46190	47356	1	230	0.0805484	1167	94	Na( )/H( ) antiporter 1	not required
STMMW_00411	nhaR	47418	48317	1	205	0.124444	900	112	transcriptional activator protein NhaR	not required
STMMW_00421	STMMW_00421	48372	50411	-1	990	0.173529	2040	354	putative glycosyl hydrolase	not required
STMMW_00431	STMMW_00431	50451	51824	-1	1089	0.25182	1374	346	putative transport protein	not required
STMMW_00441	rpsT	52280	52543	-1	3	0.00378788	264	1	30S ribosomal protein S20	required
STMMW_00451	yaaY	52649	52864	1	10	0.0185185	216	4	conserved hypothetical protein	required
STMMW_00461	ribF	52872	53810	1	1	0.00106496	939	1	riboflavin biosynthesis protein RibF	required
STMMW_00471	ileS	53855	56689	1	64	0.0031746	2835	9	isoleucyl-tRNA synthetase	required
STMMW_00481	lspA	56689	57189	1	14	0.00798403	501	4	lipoprotein signal peptidase	required
STMMW_00491	fkpB	57344	57793	1	179	0.124444	450	56	probable FkbB-type 16 kD peptidyl-prolyl cis- trans isomerase	not required
STMMW_00501	ispH	57796	58746	1	53	0.0115668	951	11	LytB protein	required
STMMW_00511	STMMW_00511	58946	60148	1	784	0.23857	1203	287	conserved hypothetical protein	not required
STMMW_00521	rihC	60164	61084	1	713	0.245385	921	226	putative nucleoside hydrolase (IUNH family)	not required
STMMW_00531	citB2	61106	61792	-1	777	0.344978	687	237	transcriptional regulatory protein citb	not required
STMMW_00541	citA2	61794	63413	-1	3433	0.530247	1620	859	sensor kinase cita	not required
STMMW_00551	STMMW_00551	63548	64849	-1	1569	0.389401	1302	507	oxaloacetate decarboxylase beta chain (ec 4.1.1.3)	not required
STMMW_00561	STMMW_00561	64862	66637	-1	1887	0.346847	1776	616	oxaloacetate decarboxylase alpha chain	not required
STMMW_00571	oadG	66654	66893	-1	158	0.2125	240	51	oxaloacetate decarboxylase gamma chain 1	not required
STMMW_00581	STMMW_00581	67052	68392	-1	966	0.221477	1341	297	citrate-sodium symporter	not required
STMMW_00591	citC2	68637	69680	1	534	0.214559	1044	224	[citrate (PRO-3S)-lyase] ligase	not required
STMMW_00601	citD2	69710	70003	1	158	0.170068	294	50	citrate lyase acyl carrier protein	not required
STMMW_00611	citE2	70000	70869	1	806	0.26092	870	227	citrate lyase beta chain	not required
STMMW_00621	citF2	70880	72400	1	967	0.219592	1521	334	citrate lyase alpha chain	not required
STMMW_00631	citX2	72400	72951	1	495	0.26087	552	144	citx protein	not required
STMMW_00641	citG2	72929	73837	1	476	0.159516	909	145	citg protein	not required
STMMW_00651	dapB	74017	74838	1	5	0.00486618	822	4	dihydrodipicolinate reductase	required
STMMW_00661	STMMW_00661	75088	75436	1	75	0.0859599	349	30	putative viral protein (pseudogene)	not required
STMMW_00681	carA	75881	77029	1	333	0.120975	1149	139	carbamoyl-phosphate synthase small chain	not required
STMMW_00691	carB	77048	80275	1	1471	0.163569	3228	528	carbamoyl-phosphate synthase large chain	not required
STMMW_00701	caiF	80549	80944	1	563	0.434343	396	172	transcriptional activator CaiF	not required
STMMW_00711	caiE	81021	81617	-1	533	0.252931	597	151	carnitine operon protein CaiE	not required
STMMW_00721	caiD	81726	82511	-1	620	0.227735	786	179	carnitine racemase	not required
STMMW_00731	caiC	82565	84118	-1	1234	0.283784	1554	441	probable crotonobetaine/carnitine-CoA ligase	not required
STMMW_00741	caiB	84181	85398	-1	1027	0.273399	1218	333	L-carnitine dehydratase	not required
STMMW_00751	caiA	85510	86652	-1	789	0.232721	1143	266	probable carnitine operon oxidoreductase CaiA	not required
STMMW_00761	caiT	86687	88204	-1	1581	0.288538	1518	438	probable carnitine transporter	not required
STMMW_00771	fixA	88685	89455	1	576	0.263294	771	203	FixA protein	not required
STMMW_00781	fixB	89471	90412	1	630	0.211253	942	199	FixB protein	not required
STMMW_00791	fixC	90462	91748	1	734	0.201243	1287	259	FixC protein	not required
STMMW_00801	fixX	91745	92032	1	89	0.173611	288	50	ferredoxin like protein FixX	not required
STMMW_00811	yaaU	92095	93519	1	786	0.189474	1425	270	putative metabolite transport protein	not required
STMMW_00821	STMMW_00821	93575	93838	1	193	0.234848	264	62	putative lipoprotein	not required
STMMW_00841	STMMW_00841	94132	94548	1	530	0.338129	417	141	probable secreted protein	not required
STMMW_00851	STMMW_00851	94772	95062	-1	286	0.319588	291	93	probable secreted protein	not required
STMMW_00861	STMMW_00861	95132	95224	-1	209	0.505376	93	47		not required
STMMW_00871	STMMW_00871	95272	95466	1	117	0.128205	195	25	putative inner membrane protein	not required
STMMW_00881	STMMW_00881	95960	97849	1	1756	0.334921	1890	633	putative sulfatase	not required
STMMW_00891	STMMW_00891	98054	98119	-1	27	0.106061	66	7		not required
STMMW_00901	yabF	98256	98786	1	302	0.210923	531	112	putative NAD(P)H oxidoreductase	not required
STMMW_00911	kefC	98779	100641	1	652	0.14117	1863	263	glutathione-regulated potassium-efflux system protein KefC	not required
STMMW_00921	folA	100840	101319	1	248	0.133333	480	64	dihydrofolate reductase type I	not required
STMMW_00931	apaH	101425	102273	-1	38	0.0270907	849	23	bis(5'-nucleosyl)-tetraphosphatase	required
STMMW_00941	apaG	102284	102661	-1	562	0.37037	378	140	CorD protein	not required
STMMW_00951	ksgA	102664	103485	-1	49	0.0413625	822	34	dimethyladenosine transferase	required
STMMW_00961	pdxAa	103482	104471	-1	612	0.236364	990	234	pyridoxal phosphate biosynthetic protein PdxA	not required
STMMW_00971	surA	104471	105757	-1	316	0.131313	1287	169	survival protein SurA precursor	not required
STMMW_00981	imp	105811	108171	-1	17	0.00381194	2361	9	organic solvent tolerance protein precursor	required
STMMW_00991	djlA	108425	109237	1	736	0.268143	813	218	DNAj-like protein	not required
STMMW_01001	rluA	109332	109991	-1	526	0.243939	660	161	ribosomal large subunit pseudouridine synthase A	not required
STMMW_01011	hepA	110003	112909	-1	6089	0.401445	2907	1167	probable ATP-dependent helicase HepA	not required
STMMW_01021	polB	113083	115434	-1	1418	0.222364	2352	523	DNA polymerase II	not required
STMMW_01031	STMMW_01031	115478	116098	-1	1048	0.360709	621	224	probable secreted protein	not required
STMMW_01041	STMMW_01041	116193	116252	-1	32	0.2	60	12		not required
STMMW_01051	STMMW_01051	116300	116602	1	295	0.267327	303	81	putative inner membrane protein	not required
STMMW_01061	STMMW_01061	116817	117236	1	220	0.280952	420	118	hypothetical protein	not required
STMMW_01071	araD	117242	117937	-1	465	0.21408	696	149	L-ribulose-5-phosphate 4-epimerase	not required
STMMW_01081	araA	118078	119580	-1	963	0.228876	1503	344	L-arabinose isomerase	not required
STMMW_01091	araB	119591	121300	-1	1435	0.271345	1710	464	L-ribulokinase	not required
STMMW_01101	araC	121641	122486	1	562	0.254137	846	215	arabinose operon regulatory protein	not required
STMMW_01111	yabI	122605	123372	1	519	0.231771	768	178	DedA family integral membrane protein	not required
STMMW_01121	thiQ	123411	124118	-1	606	0.276836	708	196	hypothetical ABC transporter	not required
STMMW_01131	thiP	124102	125712	-1	1304	0.27995	1611	451	putative ABC transporter integral membrane protein	not required
STMMW_01141	tbpA	125688	126671	-1	512	0.211382	984	208	thiamine-binding periplasmic protein precursor	not required
STMMW_01151	yabN	126849	128507	-1	1113	0.231465	1659	384	putative ABC transporter periplasmic solute binding protein	not required
STMMW_01152	sgrT	128600	128722	1	53	0.219512	123	27	hypothetical protein	not required
STMMW_01161	leuD	129058	129663	-1	460	0.259076	606	157	3-isopropylmalate dehydratase small subunit	not required
STMMW_01171	leuC	129674	131074	-1	1134	0.251963	1401	353	3-isopropylmalate dehydratase large subunit	not required
STMMW_01181	leuB	131077	132168	-1	899	0.271062	1092	296	3-IPM-DH	not required
STMMW_01191	leuA	132168	133739	-1	1270	0.247455	1572	389	2-isopropylmalate synthase	not required
STMMW_01201	leuL	133827	133913	-1	339	0.632184	87	55	leu operon leader peptide	not required
STMMW_01211	leuO	134570	135514	1	1261	0.409524	945	387	probable activator protein in leuABCD operon	not required
STMMW_01221	ilvI	135899	137560	1	1534	0.244284	1662	406	acetolactate synthase isozyme III large subunit	not required
STMMW_01231	ilvH	137563	138054	1	281	0.180894	492	89	acetolactate synthase isozyme III small subunit	not required
STMMW_01241	fruR	138338	139342	1	36	0.0218905	1005	22	fructose repressor	required
STMMW_01251	mraZ	139948	140406	1	366	0.117647	459	54	Protein mraZ	not required
STMMW_01261	mraW	140408	141349	1	648	0.0934183	942	88	S-adenosyl-methyltransferase	not required
STMMW_01271	ftsL	141346	141711	1	7	0.0163934	366	6	cell division protein FtsL	required
STMMW_01281	ftsI	141727	143493	1	27	0.00452745	1767	8	penicillin-binding protein 3 precursor	required
STMMW_01291	murE	143480	144967	1	4	0.00268817	1488	4	Meso-diaminopimelate-adding enzyme	required
STMMW_01301	murF	144964	146322	1	10	0.00441501	1359	6	UDP-N-acetylmuramoylalanyl-D-glutamyl-2,6-diami nopimelate--D-alan alanyl ligase	required
STMMW_01311	mraY	146316	147398	1	10	0.00277008	1083	3	UDP-MurNAc-pentapeptide phosphotransferase	required
STMMW_01321	murD	147401	148717	1	9	0.00303721	1317	4	D-glutamic acid adding enzyme	required
STMMW_01331	ftsW	148804	149961	1	1	0.000863558	1158	1	cell division protein FtsW	required
STMMW_01341	murG	149958	151025	1	10	0.00468165	1068	5	UDP-N-acetylglucosamine--N-acetylmuramyl-	required
STMMW_01351	murC	151144	152619	1	11	0.00338753	1476	5	UDP-N-acetylmuramate--L-alanine ligase	required
STMMW_01361	ddl	152612	153532	1	477	0.0977199	921	90	D-alanine--D-alanine ligase	not required
STMMW_01371	ftsQ	153534	154364	1	70	0.0264741	831	22	cell division protein FtsQ	required
STMMW_01381	ftsA	154361	155623	1	19	0.00316706	1263	4	cell division protein FtsA	required
STMMW_01391	ftsZ	155684	156835	1	0	0	1152	0	cell division protein FtsZ	required
STMMW_01401	lpxC	156936	157853	1	59	0.0283224	918	26	UDP-3-O-[3-hydroxymyristoyl] N-acetylglucosamine deacetylase	required
STMMW_01411	yacA	158201	158629	1	74	0.0885781	429	38	conserved hypothetical protein	not required
STMMW_01421	secA	158691	161396	1	321	0.026238	2706	71	preprotein translocase SecA subunit	required
STMMW_01431	mutT	161548	161943	1	311	0.270202	396	107	7,8-dihydro-8-oxoguanine-triphosphatase	not required
STMMW_01441	yacG	162265	162456	-1	28	0.09375	192	18	conserved hypothetical protein	not required
STMMW_01451	yacF	162466	163209	-1	805	0.322581	744	240	conserved hypothetical protein	not required
STMMW_01461	coaE	163209	163829	-1	54	0.0402576	621	25	dephospho-CoA kinase	required
STMMW_01471	guaC	164055	165098	1	1772	0.366858	1044	383	GMP reductase	not required
STMMW_01481	pilC	165129	166331	-1	1782	0.433084	1203	521	protein transport protein HofC	not required
STMMW_01491	pilB	166321	167706	-1	2821	0.455988	1386	632	protein transport protein HofB	not required
STMMW_01501	pilA	167716	168153	-1	1146	0.575342	438	252	prepilin peptidase dependent protein D precursor	not required
STMMW_01511	nadC	168375	169121	-1	1153	0.429719	747	321	nicotinate-nucleotide pyrophosphorylase	not required
STMMW_01521	ampD	169356	169919	1	1035	0.434397	564	245	AmpD protein (anhydro-N-acetylmuramyl-tripeptide amidase)	not required
STMMW_01531	ampE	169916	170770	1	1933	0.459649	855	393	AmpE protein	not required
STMMW_01541	STMMW_01541	170862	171812	-1	1250	0.375394	951	357	putatuve glycosysl hydrolase	not required
STMMW_01551	STMMW_01551	171812	173218	-1	2179	0.432125	1407	608	putative symporter	not required
STMMW_01561	aroP	173382	174755	-1	1793	0.373362	1374	513	aromatic amino acid transport protein AroP	not required
STMMW_01571	pdhR	175318	176082	1	517	0.142484	765	109	pyruvate dehydrogenase complex repressor	not required
STMMW_01581	aceE	176242	178905	1	46	0.00675676	2664	18	pyruvate dehydrogenase E1 component	required
STMMW_01591	aceF	178920	180809	1	6	0.0021164	1890	4	dihydrolipoamide acetyltransferase component (E2) of pyruvate dehydrogenase	required
STMMW_01601	lpdA	181009	182433	1	2	0.00140351	1425	2	dihydrolipoamide dehydrogenase	required
STMMW_01611	STMMW_01611	182722	183006	1	166	0.214035	285	61	probable secreted protein	not required
STMMW_01621	STMMW_01621	183044	183835	-1	676	0.282828	792	224	probable secreted protein	not required
STMMW_01631	yacH	183848	185462	-1	2114	0.373994	1615	604	putative exported protein (pseudogene)	not required
STMMW_01641	acnB	185851	188448	1	108	0.0257891	2598	67	aconitate hydratase 2 (citrate hydro-lyase 2)	required
STMMW_01651	STMMW_01651	188509	189351	-1	20	0.0142349	843	12	HNH endonuclease	required
STMMW_01661	yacL	189597	189959	1	463	0.429752	363	156	conserved hypothetical protein	not required
STMMW_01671	kdgT	190194	191147	1	603	0.21174	954	202	2-keto-3-deoxygluconate permease	not required
STMMW_01681	STMMW_01681	191144	192415	1	1454	0.290094	1272	369	conserved hypothetical protein	not required
STMMW_01691	pdxAb	192405	193388	1	75	0.0487805	984	48	4-hydroxythreonine-4-phosphate dehydrogenase	ambiguous
STMMW_01701	STMMW_01701	193398	194165	1	519	0.251302	768	193	putative transcriptional regulator	not required
STMMW_01711	speD	194195	194989	-1	1318	0.431447	795	343		not required
STMMW_01721	speE	195010	195870	-1	1891	0.527294	861	454	Putrescine aminopropyltransferase	not required
STMMW_01731	yacC	195977	196324	-1	268	0.281609	348	98	putative exported protein	not required
STMMW_01741	cueO	196526	198136	1	3395	0.486034	1611	783	possible multicopper oxidase precursor	not required
STMMW_01751	gcd	198214	200604	-1	3739	0.452112	2391	1081	glucose dehydrogenase	not required
STMMW_01761	hpt	200810	201346	1	446	0.271881	537	146	hypoxanthine phosphoribosyltransferase	not required
STMMW_01771	yadF	201404	202066	-1	27	0.0271493	663	18	carbonic anhydrase	required
STMMW_01781	yadG	202175	203101	1	660	0.249191	927	231	hypothetical ABC transporter ATP-binding protein	not required
STMMW_01791	yadH	203098	203868	1	776	0.29572	771	228	ABC transporter integral membrane protein	not required
STMMW_01801	stiH	203985	205064	-1	1709	0.426852	1080	461	putative fimbriae	not required
STMMW_01811	stiC	205073	207619	-1	3689	0.388693	2547	990	putativie fimbrial usher. putativie fimbrial usher	not required
STMMW_01821	stiB	207646	208329	-1	867	0.361111	684	247	putative fimbrial chaperone	not required
STMMW_01831	stiA	208377	208916	-1	1119	0.462963	540	250	putative fimbrial subunit	not required
STMMW_01841	yadI	209286	209726	1	886	0.553288	441	244	putative PTS system IIA component	not required
STMMW_01851	yadE	209788	211017	1	1183	0.337398	1230	415	putative exported protein	not required
STMMW_01861	panD	211024	211404	-1	375	0.341207	381	130	Aspartate alpha-decarboxylase	not required
STMMW_01871	panC	211499	212353	-1	737	0.264327	855	226	Pantoate activating enzyme	not required
STMMW_01881	panB	212479	213270	-1	851	0.323232	792	256	3-methyl-2-oxobutanoate hydroxymethyltransferase	not required
STMMW_01891	folK	213391	213870	-1	71	0.0458333	480	22	2-amino-4-hydroxy-6- hydroxymethyldihydropteridinepyrophosphokinase	required
STMMW_01901	pcnB	213867	215285	-1	377	0.131783	1419	187	poly(A) polymerase	not required
STMMW_01911	yadB	215426	216367	-1	790	0.280255	942	264	glutamyl-tRNA synthetase-related protein	not required
STMMW_01921	dksA	216391	216846	-1	295	0.208333	456	95	dosage-dependent dnaK suppressor protein	not required
STMMW_01931	sfsA	217023	217727	-1	643	0.260993	705	184	Sugar fermentation stimulation protein homolog	not required
STMMW_01941	ligT	217744	218274	-1	426	0.276836	531	147	2'-5' RNA ligase	not required
STMMW_01951	hrpB	218302	220776	1	2634	0.305455	2475	756	ATP-dependent helicase HrpB	not required
STMMW_01961	mrcB	220917	223439	1	2442	0.304003	2523	767	penicillin-binding protein 1B	not required
STMMW_01971	fhuA	223732	225921	1	1608	0.257534	2190	564	ferrichrome-iron receptor	not required
STMMW_01981	fhuC	225970	226767	1	407	0.166667	798	133	ferrichrome transport ATP-binding protein FhuC	not required
STMMW_01991	fhuD	226767	227657	1	485	0.166105	891	148	ferrichrome-binding periplasmic protein precursor	not required
STMMW_02001	fhuB	227654	229711	1	802	0.134111	2058	276	ferrichrome transport protein FhuB precursor	not required
STMMW_02011	stfA	230650	231210	1	843	0.486631	561	273	major fimbrial subunit stfa (putative fimbrial subunit)	not required
STMMW_02021	stfC	231296	233953	1	3416	0.386381	2658	1027	outer membrane usher protein stfc (putative fimbrial outer membrane usher)	not required
STMMW_02031	stfD	233971	234723	1	1004	0.36255	753	273	periplasmic fimbrial chaperone stfd	not required
STMMW_02041	stfE	234787	235254	1	785	0.480769	468	225	minor fimbrial subunit stfe (putaive minor fimbrial subunit)	not required
STMMW_02051	stfF	235251	235727	1	476	0.392034	477	187	minor fimbrial subunit stff	not required
STMMW_02061	stfG	235727	236257	1	889	0.478343	531	254	putative minor fimbrial subunit	not required
STMMW_02071	STMMW_02071	236257	237096	1	1366	0.44881	840	377	putative exported protein	not required
STMMW_02081	hemL	237203	238483	-1	14	0.00624512	1281	8	GSA	required
STMMW_02091	clcA	238653	240074	1	895	0.228551	1422	325	H /Cl-exchange transporter clcA	not required
STMMW_02101	yadR	240111	240500	1	11	0.0102564	390	4	conserved hypothetical protein	required
STMMW_02111	yadS	240601	241224	-1	818	0.373397	624	233	putative membrane protein	not required
STMMW_02121	btuF	241261	242061	-1	627	0.269663	801	216	Vitamin B12 transport protein btuF precursor	not required
STMMW_02131	mtn	242054	242752	-1	31	0.0286123	699	20	MTA/SAH nucleosidase	required
STMMW_02141	dgt	242837	244354	1	3564	0.518445	1518	787	dGTP triphosphohydrolase	not required
STMMW_02151	htrA	244484	245911	1	1238	0.290616	1428	415	heat shock protein HtrA	not required
STMMW_02161	cdaR	246064	247221	1	1085	0.301382	1158	349	conserved hypothetical protein	not required
STMMW_02171	yaeH	247310	247696	-1	361	0.284238	387	110	conserved hypothetical protein	not required
STMMW_02181	STMMW_02181	247943	249244	1	1074	0.301843	1302	393	putative inner membrane protein	not required
STMMW_02191	dapD	249281	250105	-1	55	0.0266667	825	22	2,3,4,5-tetrahydropyridine-2-carboxylate N- succinyltransferase	required
STMMW_02201	glnD	250135	252807	-1	46	0.00785634	2673	21	PII uridylyl-transferase	required
STMMW_02211	map	253044	253838	-1	6	0.00503145	795	4	methionine aminopeptidase	required
STMMW_02221	rpsB	254289	255014	1	21	0.00550964	726	4	30S ribosomal protein S2	required
STMMW_02231	tsf	255272	256123	1	5	0.00469484	852	4	EF-Ts	required
STMMW_02241	pyrH	256268	256993	1	4	0.00275482	726	2	UK	required
STMMW_02251	frr	257140	257697	1	1	0.00179211	558	1	RRF	required
STMMW_02261	dxr	257838	259034	1	10	0.00334169	1197	4	1-deoxy-D-xylulose 5-phosphate reductoisomerase	required
STMMW_02271	uppS	259347	260105	1	0	0	759	0	undecaprenyl pyrophosphate synthetase	required
STMMW_02281	cdsA	260118	260975	1	35	0.013986	858	12	phosphatidate cytidylyltransferase	required
STMMW_02291	yaeL	260987	262339	1	16	0.00591279	1353	8	putative membrane protein	required
STMMW_02301	yaeT	262371	264785	1	4	0.00124224	2415	3	outer membrane protein precursor	required
STMMW_02311	hlpA	264908	265393	1	71	0.0740741	486	36	outer membrane protein OmpH precursor	not required
STMMW_02321	lpxD	265397	266422	1	35	0.0107212	1026	11	UDP-3-O-[3-hydroxymyristoyl] glucosamine N- acyltransferase	required
STMMW_02331	fabZ	266528	266983	1	4	0.00657895	456	3	(3R)-hydroxymyristol acyl carrier protein dehydrase	required
STMMW_02341	lpxA	266987	267775	1	3	0.00253485	789	2	UDP-N-acetylglucosamine acyltransferase	required
STMMW_02351	lpxB	267775	268923	1	23	0.0078329	1149	9	lipid-A-disaccharide synthase	required
STMMW_02361	rnhB	268920	269516	1	173	0.0854271	597	51	RNase HII	not required
STMMW_02371	dnaE	269540	273022	1	110	0.00574218	3483	20	DNA polymerase III, alpha chain	required
STMMW_02381	accA	273035	273994	1	28	0.00416667	960	4	acetyl-coenzyme A carboxylase carboxyl transferase subunit alpha	required
STMMW_02391	STMMW_02391	274174	275937	1	1089	0.19898	1764	351	putative secreted chitinase	not required
STMMW_02401	ldcC	276013	278154	1	1182	0.20915	2142	448	lysine decarboxylase	not required
STMMW_02411	yaeR	278210	278599	1	287	0.241026	390	94	conserved hypothetical protein	not required
STMMW_02421	mesJ	278743	279954	1	95	0.00907591	1212	11	cell cycle protein MesJ	required
STMMW_02431	rof	280038	280298	-1	125	0.203065	261	53	ROF protein	not required
STMMW_02441	yaeP	280285	280503	-1	182	0.365297	219	80	conserved hypothetical protein	not required
STMMW_02451	yaeQ	280683	281228	1	288	0.199634	546	109	conserved hypothetical protein	not required
STMMW_02461	yaeJ	281225	281647	1	190	0.186761	423	79	putative release factor	not required
STMMW_02471	cutF	281679	282380	1	489	0.237892	702	167	copper homeostasis protein CutF precursor (lipoprotein nlpE)	not required
STMMW_02481	proS	282454	284172	-1	27	0.00814427	1719	14	prolyl-tRNA synthetase	required
STMMW_02491	yaeB	284283	284990	-1	356	0.206215	708	146	conserved hypothetical protein	not required
STMMW_02501	rcsF	284987	285391	-1	455	0.333333	405	135	RcsF protein	not required
STMMW_02511	metQ	285510	286325	-1	625	0.306373	816	250	putative lipoprotein precursor	not required
STMMW_02521	yaeE	286364	287017	-1	630	0.344037	654	225	putative ABC transporter permease protein	not required
STMMW_02531	abc	287010	288041	-1	723	0.263566	1032	272	putative ABC transporter ATP-binding protein	not required
STMMW_02532	yaeD	288231	288797	1	18	0.0229277	567	13	D-glycero-D-manno-heptose 1,7-bisphosphate phosphatase	required
STMMW_02541	dkgB	295056	295859	1	149	0.0883085	804	71	hypothetical oxidoreductase	not required
STMMW_02551	yafC	295880	296794	-1	238	0.118033	915	108	hypothetical transcriptional regulator	not required
STMMW_02561	STMMW_02561	296899	298074	1	324	0.113946	1176	134	putative drug efflux protein	not required
STMMW_02571	yafD	298227	299006	1	178	0.0923077	780	72	Hypothetical UPF0294 protein <ORFName>	not required
STMMW_02581	yafE	299084	299854	1	242	0.120623	771	93	putative methyltransferase	not required
STMMW_02591	dniR	299910	301277	-1	375	0.125	1368	171	membrane-bound lytic murein transglycosylase D precursor	not required
STMMW_02601	gloB	301349	302104	-1	149	0.0820106	756	62	probable hydroxyacylglutathione hydrolase	not required
STMMW_02611	yafS	302139	302861	1	240	0.128631	723	93	conserved hypothetical protein	not required
STMMW_02621	rnhA	302858	303325	-1	47	0.042735	468	20	RNase H	required
STMMW_02631	dnaQ	303389	304120	1	12	0.0122951	732	9	DNA polymerase III epsilon subunit	required
STMMW_02641	sciA	304652	305707	-1	378	0.129735	1056	137	conserved hypothetical pathogenicity island protein	not required
STMMW_02651	sciB	305718	306713	-1	489	0.159639	996	159	type VI secretion protein	not required
STMMW_02661	sciC	306710	308593	-1	754	0.146497	1884	276	type VI system protein	not required
STMMW_02671	sciD	308609	309103	-1	99	0.0969697	495	48	putative type VI system cytoplasmic protein	not required
STMMW_02691	sciE	309100	309924	-1	259	0.101818	825	84	putative type VI secretion system protein	not required
STMMW_02701	sciF	309911	310813	-1	395	0.145072	903	131	conserved hypothetical protein	not required
STMMW_02711	sciG	311181	313820	1	1143	0.149621	2640	395	type VI system ATPase	not required
STMMW_02731	sciH	313920	314462	1	109	0.0847145	543	46	putative type VI secretion system protein	not required
STMMW_02741	sciI	314486	315979	1	381	0.0890228	1494	133	type VI system secreted protein	not required
STMMW_02751	STMMW_02751	316042	316152	1	61	0.18018	111	20	invasol	not required
STMMW_02771	sciJ	316165	316611	1	214	0.17226	447	77	putative exported protein	not required
STMMW_02791	sciK	316865	317350	1	268	0.244856	486	119	putative hemolysin-coregulated protein	not required
STMMW_02811	STMMW_02811	317655	318140	1	73	0.0596708	486	29	conserved hypothetical protein	ambiguous
STMMW_02831	STMMW_02831	318125	318508	1	6	0.015625	384	6	putative periplasmic protein	required
STMMW_02841	sciK1	318651	319136	1	135	0.152263	486	74	putative hemolysin-coregulated protein	not required
STMMW_02851	sciN	319203	319739	1	77	0.0595903	537	32	putative lipoprotein	ambiguous
STMMW_02861	sciO	319743	321086	1	829	0.103423	1344	139	putative type VI secretion protein	not required
STMMW_02871	sciP	321083	322387	1	393	0.109579	1305	143	putative type VI system protein	not required
STMMW_02881	sciQ	322392	323165	1	309	0.118863	774	92	putative inner membrane protein	not required
STMMW_02891	sciR	323356	323799	1	39	0.0337838	444	15	putative shiga-like toxin A subunit	required
STMMW_02901	sciS	323833	327702	1	1228	0.122481	3870	474	type VI system protein	not required
STMMW_02911	sciT	327702	328490	1	227	0.0925222	789	73	conserved hypothetical protein	not required
STMMW_02921	sciU	328487	328903	1	262	0.201439	417	84	conserved hypothetical periplasmic protein	not required
STMMW_02931	sciV	328927	329448	1	410	0.197318	522	103	conserved hypothetical pathogenicity island protein	not required
STMMW_02941	vgrS	329845	332034	1	590	0.124658	2190	273	putative type VI system protein	not required
STMMW_02951	sciW	332058	332504	1	192	0.194631	447	87	conserved hypothetical protein	not required
STMMW_02961	rhs	332523	336617	1	1758	0.128449	4095	526	putative Rhs family protein	not required
STMMW_02971	STMMW_02971	336611	336874	1	52	0.0492424	264	13	conserved hypothetical protein	ambiguous
STMMW_02981	STMMW_02981	336890	337804	1	432	0.187978	915	172		not required
STMMW_02991	sciX	337801	338247	1	31	0.033557	447	15	conserved hypothetical cytoplasmic protein	required
STMMW_03011	STMMW_03011	338431	338562	1	0	0	132	0	conserved hypothetical protein	required
STMMW_03021	sciY	338765	339244	1	5	0.00833333	480	4	putative phosphotriesterase (pseudogene)	required
STMMW_03041	STMMW_03041	339300	339575	-1	240	0.289855	276	80	hypothetical protein	not required
STMMW_03051	STMMW_03051	340016	340324	1	5	0.00647249	309	2	conserved hypothetical pathogenicity island protein	required
STMMW_03061	STMMW_03061	340361	340674	-1	266	0.394904	314	124	conserved hypothetical cytoplasmic protein (pseudogene)	not required
STMMW_03071	STMMW_03071	340727	340924	1	170	0.363636	198	72	putative transposase	not required
STMMW_03081	STMMW_03081	341004	341469	1	287	0.197425	466	92	putative IS1400 transposase B (pseudogene)	not required
STMMW_03091	safA	342181	342693	1	168	0.148148	513	76	lipoprotein	not required
STMMW_03101	safB	342801	343514	1	356	0.233894	714	167	salmonella atypical fimbria chaperone	not required
STMMW_03111	safC	343538	346048	1	1356	0.203505	2511	511	salmonella atypical fimbria outer membrane usher	not required
STMMW_03121	safD	346070	346540	1	197	0.142251	471	67	fimbrial structural subunit	not required
STMMW_03131	ybeJ	346946	347767	1	573	0.274939	822	226	conserved hypothetical protein	not required
STMMW_03132	STMMW_03132	347892	348107	1	155	0.263889	216	57	conserved hypothetical protein	not required
STMMW_03133	STMMW_03133	348248	348379	1	76	0.174242	132	23	putative transposase	not required
STMMW_03151	sinR	348582	349529	1	128	0.0506329	948	48	LysR-family transcriptional regulator	ambiguous
STMMW_03161	STMMW_03161	349646	349861	1	53	0.12963	216	28	conserved hypothetical protein	not required
STMMW_03171	pagN	349865	350584	-1	453	0.244444	720	176	possible outer membrane adhesin	not required
STMMW_03181	sciZ	350915	351322	-1	166	0.240196	408	98	probable secreted protein	not required
STMMW_03191	yafV	351693	352460	-1	141	0.0898438	768	69	possible hydrolase	not required
STMMW_03201	fadE	352569	355013	-1	908	0.126789	2445	310	possible acyl-CoA dehydrogenase	not required
STMMW_03211	gmhA	355253	355831	1	17	0.0172712	579	10	phosphoheptose isomerase	required
STMMW_03221	yafJ	356044	356811	1	383	0.179688	768	138	conserved hypothetical protein	not required
STMMW_03231	yafK	356782	357522	-1	226	0.129555	741	96	putative exported protein	not required
STMMW_03241	dbh	357772	358827	1	858	0.195076	1056	206	DNA polymerase IV	not required
STMMW_03251	STMMW_03251	359046	360175	1	565	0.185841	1130	210	release factor H-coupled RctB family protein (pseudogene)	not required
STMMW_03261	prfH	360175	360789	1	87	0.0682927	615	42	putative peptide chain release factor	ambiguous
STMMW_03271	pepD	360945	362402	-1	316	0.0864198	1458	126	aminoacyl-histidine dipeptidase precursor	not required
STMMW_03281	gpt	362651	363109	1	317	0.176471	459	81	xanthine-guanine phosphoribosyltransferase	not required
STMMW_03291	frsA	363198	364442	1	721	0.189558	1245	236	conserved hypothetical protein	not required
STMMW_03301	crl	364500	364901	1	429	0.353234	402	142	curlin genes transcriptional activator	not required
STMMW_03311	phoE	364952	366004	-1	637	0.20038	1053	211	outer membrane pore protein E precursor	not required
STMMW_03321	proB	366287	367390	1	1147	0.0914855	1104	101	glutamate 5-kinase	not required
STMMW_03331	proA	367402	368652	1	250	0.100719	1251	126	gamma-glutamyl phosphate reductase	not required
STMMW_03341	int	368858	369853	-1	293	0.124498	996	124	BTP1 integrase	not required
STMMW_03351	xis	369898	370248	-1	133	0.122507	351	43	BTP1 excisionase	not required
STMMW_03361	EaC	370259	370852	-1	370	0.185185	594	110	BTP1 predicted prophage protein	not required
STMMW_03371	EaG	370924	371208	-1	119	0.154386	285	44	BTP1 predicted prophage protein	not required
STMMW_03381	EaA	371201	372166	-1	526	0.18323	966	177	BTP1 predicted prophage protein	not required
STMMW_03391	EaD	372177	372932	-1	213	0.12037	756	91	BTP1 predicted prophage protein	not required
STMMW_03411	EaF	372932	373576	-1	154	0.0930233	645	60	BTP1 predicted prophage protein	not required
STMMW_03421	EaE	373573	373983	-1	382	0.199513	411	82	BTP1 predicted prophage protein	not required
STMMW_03422	STMMW_03422	373980	374150	-1	71	0.128655	171	22	BTP1 predicted prophage protein	not required
STMMW_03431	abc2	374161	374454	-1	126	0.14966	294	44	BTP1 anti-RecBCD	not required
STMMW_03441	abc1	374501	374785	-1	125	0.231579	285	66	BTP1 anti-RecBCD	not required
STMMW_03451	erf	374785	375492	-1	898	0.416667	708	295	BTP1 predicted prophage protein	not required
STMMW_03461	arf	375489	375632	-1	27	0.0555556	144	8	BTP1 predicted prophage protein	ambiguous
STMMW_03471	kil	375622	375810	-1	125	0.195767	189	37	BTP1 kil	not required
STMMW_03481	cIII	375791	375973	-1	130	0.262295	183	48	BTP1 regulatory protein cIII	not required
STMMW_03491	STMMW_03491	376060	376206	-1	24	0.102041	147	15	BTP1 predicted prophage protein	not required
STMMW_03501	STMMW_03501	376267	376566	-1	540	0.59	300	177	BTP1 predicted prophage protein	not required
STMMW_03511	ral	376606	376806	-1	129	0.253731	201	51	BTP1 antirestriction protein	not required
STMMW_03521	N	376885	377217	-1	103	0.168168	333	56	BTP1 antitermination protein	not required
STMMW_03522	STMMW_03522	377620	377790	1	61	0.169591	171	29	BTP1 predicted prophage protein	not required
STMMW_03531	st313td	377826	378749	-1	562	0.284632	924	263	BTP1 putative virulence associated protein	not required
STMMW_03541	cI	378838	379563	-1	18	0.0206612	726	15	BTP1 repressor protein cI	required
STMMW_03551	cro	379638	379853	1	108	0.175926	216	38	BTP1 antirepressor protein	not required
STMMW_03561	cII	379964	380245	1	138	0.195035	282	55	BTP1 transcriptioanl activator cII	not required
STMMW_03571	O	380419	381252	1	290	0.154676	834	129	BTP1 replication protein	not required
STMMW_03581	P	381249	382625	1	712	0.154684	1377	213	BTP1 replication associated protein	not required
STMMW_03582	STMMW_03582	382622	382891	1	179	0.225926	270	61	BTP1 predicted prophage protein	not required
STMMW_03601	STMMW_03601	382963	383235	1	259	0.282051	273	77	BTP1 predicted prophage protein	not required
STMMW_03602	STMMW_03602	383245	383454	1	164	0.304762	210	64	BTP1 predicted prophage protein	not required
STMMW_03611	STMMW_03611	383451	383759	1	93	0.165049	309	51	BTP1 predicted prophage protein	not required
STMMW_03621	STMMW_03621	383756	383950	1	101	0.133333	195	26	BTP1 predicted prophage protein	not required
STMMW_03631	ninB	383907	384353	1	262	0.178971	447	80	BTP1 predicted prophage protein	not required
STMMW_03641	ninE	384490	384672	1	54	0.180328	183	33	BTP1 predicted prophage protein	not required
STMMW_03651	ninF	384669	384839	1	149	0.22807	171	39	BTP1 predicted prophage protein	not required
STMMW_03661	ninG	384832	385443	1	243	0.183007	612	112	BTP1 predicted prophage protein	not required
STMMW_03671	ninY	385440	385664	1	40	0.111111	225	25	BTP1 predicted prophage protein	not required
STMMW_03681	STMMW_03681	385661	385864	1	121	0.210784	204	43	BTP1 predicted prophage protein	not required
STMMW_03691	Q	386021	386539	1	380	0.165703	519	86	BTP1 antiterminator protein	not required
STMMW_03711	S	387004	387207	1	136	0.284314	204	58	BTP1 holin	not required
STMMW_03721	R	387179	387682	1	273	0.200397	504	101	BTP1 lysozyme	not required
STMMW_03731	Rz	387735	388208	1	198	0.147679	474	70	BTP1 lysis associated membrane protein	not required
STMMW_03741	rha	388358	388963	1	274	0.174917	606	106	BTP1 predicted prophage protein	not required
STMMW_03751	pid	389225	389539	-1	326	0.390476	315	123	BTP1 P22 instigator of dgo-expression	not required
STMMW_03761	STMMW_03761	389793	390035	1	207	0.259259	243	63	BTP1 predicted prophage protein	not required
STMMW_03762	STMMW_03762	390037	390216	1	100	0.277778	180	50	BTP1 hypothetical protein	not required
STMMW_03771	STMMW_03771	390240	390728	1	337	0.226994	489	111	BTP1 terminase small subunit	not required
STMMW_03781	STMMW_03781	390706	392205	1	756	0.2	1500	300	BTP1 terminase large subunit	not required
STMMW_03791	STMMW_03791	392205	394382	1	1737	0.254362	2178	554	BTP1 portal protein	not required
STMMW_03801	STMMW_03801	394396	395307	1	579	0.201754	912	184	BTP1 scaffolding protein	not required
STMMW_03811	STMMW_03811	395307	396599	1	888	0.232792	1293	301	BTP1 coat protein	not required
STMMW_03821	STMMW_03821	396640	397200	1	562	0.285205	561	160	BTP1 predicted prophage protein	not required
STMMW_03831	STMMW_03831	397184	397684	1	349	0.257485	501	129	BTP1 DNA stabilization protein	not required
STMMW_03841	STMMW_03841	397677	399062	1	965	0.23088	1386	320	BTP1 packaged DNA stabilization protein	not required
STMMW_03851	STMMW_03851	399066	399767	1	604	0.2849	702	200	BTP1 packaged DNA stabilization and needle protein	not required
STMMW_03861	STMMW_03861	399767	400222	1	318	0.232456	456	106	BTP1 head assembly protein	not required
STMMW_03871	STMMW_03871	400225	400914	1	613	0.250725	690	173	BTP1 DNA transfer protein	not required
STMMW_03881	STMMW_03881	400924	402294	1	675	0.189643	1371	260	BTP1 DNA transfer protein	not required
STMMW_03891	STMMW_03891	402294	404261	1	860	0.169715	1968	334	BTP1 DNA tranfer protein	not required
STMMW_03901	STMMW_03901	404417	406402	1	2220	0.336858	1986	669	BTP1 tail spike protein	not required
STMMW_03911	gtrC	406442	408364	-1	666	0.184607	1923	355	BTP1Â O-antigen acetyltransferase	not required
STMMW_03921	gtrA	408436	408711	-1	197	0.333333	276	92	BTP1 bactoprenol-linked glucose transferase	not required
STMMW_03931	STMMW_03931	408985	409230	-1	131	0.191057	246	47	BTP1 predicted prophage protein	not required
STMMW_03941	STMMW_03941	409694	410494	-1	378	0.193508	801	155	putative IS3 transposase	not required
STMMW_03951	dhaF	410412	411126	1	183	0.0965035	715	69	glycerol dehydratase reactivation factor large subunit (pseudogene)	not required
STMMW_03971	STMMW_03971	411236	411559	1	170	0.166667	324	54	conserved hypothetical protein	not required
STMMW_03981	STMMW_03981	411900	413138	1	326	0.132365	1239	164	putative permease/MSF transporter	not required
STMMW_03991	leuC2	413270	414691	1	450	0.139241	1422	198	3-isopropylmalate dehydratase large subunit 2 (ec 4.2.1.33) (isopropylmalate isomerase 2) (alpha-ipm isomerase 2) (ipmi 2). 3-isopropylmalate dehydratase large subunit 2 (ec 4.2.1.33) (isopropylmalate isomerase 2) (alpha-ipm isomerase 2) (ipmi 2)	not required
STMMW_04001	leuD2	414693	415319	1	99	0.0717703	627	45	3-isopropylmalate dehydratase small subunit 2 (ec 4.2.1.33) (isopropylmalate isomerase 2) (alpha-ipm isomerase 2) (ipmi 2)	ambiguous
STMMW_04011	STMMW_04011	415334	416212	1	185	0.0910125	879	80	putative fumarylacetoacetate (faa) hydrolase	not required
STMMW_04021	STMMW_04021	416212	417126	1	266	0.114754	915	105	putative hydrolase or acyltransferase	not required
STMMW_04031	STMMW_04031	417160	418125	1	597	0.182195	966	176	putative LysR family transcriptional regulator	not required
STMMW_04041	STMMW_04041	418070	418342	-1	223	0.205128	273	56	conserved hypothetical protein	not required
STMMW_04051	STMMW_04051	419033	419431	1	6	0.0100251	399	4	probable secreted protein	required
STMMW_04061	stbE	419478	420236	-1	313	0.194993	759	148	fimbrial chaperone protein	not required
STMMW_04071	stbD	420202	421527	-1	1007	0.27451	1326	364	putative fimbrial protein	not required
STMMW_04081	stbC	421532	424099	-1	646	0.115265	2568	296	outer membrane fimbrial usher protein	not required
STMMW_04091	stbB	424083	424844	-1	181	0.0800525	762	61	fimbrial chaperone protein	not required
STMMW_04101	stbA	424906	425442	-1	292	0.199255	537	107	probable fimbrial protein	not required
STMMW_04111	STMMW_04111	426076	426840	1	33	0.0261438	765	20	possible transmembrane regulator	required
STMMW_04121	STMMW_04121	426813	427313	1	36	0.0518962	501	26	putative periplasmic protein	ambiguous
STMMW_04131	STMMW_04131	427613	429187	1	1253	0.274921	1575	433	putative rtn protein	not required
STMMW_04141	STMMW_04141	429287	430030	1	333	0.130376	744	97	possible transmembrane regulator	not required
STMMW_04151	STMMW_04151	430003	430491	1	107	0.0879346	489	43	putative exported protein	not required
STMMW_04161	STMMW_04161	430893	431417	1	23	0.0342857	525	18	possible outer membrane protein	required
STMMW_04171	STMMW_04171	431561	432202	1	39	0.0404984	642	26	possible transcriptionl regulator	required
STMMW_04181	STMMW_04181	432213	432437	1	91	0.235556	225	53	probable secreted protein	not required
STMMW_04191	STMMW_04191	432495	432854	1	147	0.202778	360	73	probable lipoprotein	not required
STMMW_04201	STMMW_04201	432924	434435	-1	458	0.112434	1512	170	putative outer membrane efflux lipoprotein	not required
STMMW_04211	STMMW_04211	434398	437565	-1	1099	0.135732	3168	430	putative cation efflux protein	not required
STMMW_04221	STMMW_04221	437562	438788	-1	678	0.193969	1227	238	putative cation efflux pump	not required
STMMW_04231	STMMW_04231	439065	441353	1	987	0.152468	2289	349	putative cation transport atpase (ec 3.6.1.-)	not required
STMMW_04241	STMMW_04241	441365	441829	1	196	0.137634	465	64	Putative transcriptional regulatory protein	not required
STMMW_04251	STMMW_04251	441907	442101	1	79	0.14359	195	28	putative metal-binding transport protein	not required
STMMW_04261	STMMW_04261	442394	443647	1	343	0.116427	1254	146	putative metabolite transport protein	not required
STMMW_04271	mod	443836	445794	1	800	0.15365	1959	301	type III restriction-modification system enzyme (StyLTI) modification methylase	not required
STMMW_04281	res	445804	448776	1	1636	0.184662	2973	549	type III restriction-modification system enzyme (StyLTI) (ec 3.1.21.5)	not required
STMMW_04291	STMMW_04291	449053	449154	1	76	0.205882	102	21	hypothetical protein	not required
STMMW_04301	STMMW_04301	449271	450674	1	492	0.158832	1404	223	probable terminal oxidase subunit I	not required
STMMW_04311	STMMW_04311	450671	451681	1	254	0.098912	1011	100	probable terminal oxidase subunit II	not required
STMMW_04321	STMMW_04321	451698	451922	1	42	0.106667	225	24	hypothetical protein	not required
STMMW_04331	STMMW_04331	452018	453022	1	390	0.128358	1005	129	AraC-family transcriptional regulator	not required
STMMW_04341	foxA	453168	455276	1	678	0.116643	2109	246	ferrioxamine B receptor precursor	not required
STMMW_04351	yahN	455317	455949	-1	183	0.131122	633	83	RhtC-like transporter	not required
STMMW_04361	yahO	456181	456456	1	63	0.101449	276	28	probable secreted protein	not required
STMMW_04371	prpR	456592	458217	-1	554	0.137761	1626	224	propionate catabolism operon regulatory protein	not required
STMMW_04381	prpB	458482	459369	1	384	0.167793	888	149	putative carboxyvinyl-carboxyphosphonate phosphorylmutase	not required
STMMW_04391	prpC	459492	460661	1	636	0.17094	1170	200	methylcitrate synthase	not required
STMMW_04401	prpD	460701	462152	1	562	0.141873	1452	206	PrpD protein	not required
STMMW_04411	prpE	462193	464079	1	633	0.113937	1887	215	PrpE protein	not required
STMMW_04421	hemB	464183	465157	-1	44	0.0164103	975	16	delta-aminolevulinic acid dehydratase	required
STMMW_04431	yaiU	465670	468606	1	2469	0.265577	2937	780	puative autotransporter/virulence factor	not required
STMMW_04441	iprA	468692	469315	1	514	0.338141	624	211	conserved hypothetical protein	not required
STMMW_04451	ampH	469360	470490	-1	710	0.248453	1131	281	penicillin-binding protein AmpH	not required
STMMW_04461	sbmA	470966	472084	1	368	0.11975	1119	134	SbmA protein	not required
STMMW_04471	yaiW	472099	473193	1	710	0.183562	1095	201	putative lipoprotein	not required
STMMW_04481	yaiY	473231	473539	-1	78	0.116505	309	36	putative membrane protein	not required
STMMW_04491	yaiZ	473807	474022	1	102	0.199074	216	43	putative membrane protein	not required
STMMW_04501	ddlA	474048	475142	-1	407	0.13516	1095	148	D-alanine:D-alanine ligase A	not required
STMMW_04511	STMMW_04511	475220	475933	1	194	0.127451	714	91	hypothetical protein	not required
STMMW_04521	STMMW_04521	476102	477313	1	556	0.15099	1212	183	possible efflux pump	not required
STMMW_04531	yaiB	477604	477870	1	465	0.441948	267	118	conserved hypothetical protein	not required
STMMW_04532	STMMW_04532	477894	478055	-1	97	0.222222	162	36	hypothetical protein	not required
STMMW_04541	psiF	478222	478542	1	152	0.249221	321	80	phosphate starvation-inducible protein PsiF	not required
STMMW_04551	adrA	478634	479746	1	341	0.105121	1113	117	adrA protein	not required
STMMW_04561	proC	479761	480570	-1	16	0.0135802	810	11	pyrroline-5-carboxylate reductase	required
STMMW_04571	yaiI	480710	481165	1	35	0.0482456	456	22	conserved hypothetical protein	ambiguous
STMMW_04581	aroL	481350	481895	1	382	0.164835	546	90	shikimate kinase II	not required
STMMW_04591	yaiA	481922	482113	1	125	0.223958	192	43	conserved hypothetical protein	not required
STMMW_04601	aroM	482364	483041	1	243	0.151917	678	103	AroM protein	not required
STMMW_04611	yaiE	483112	483396	1	138	0.140351	285	40	conserved hypothetical protein	not required
STMMW_04621	rdgC	483434	484345	-1	282	0.128289	912	117	recombination associated protein	not required
STMMW_04631	yajF	484471	485379	1	316	0.129813	909	118	hypothetical ROK-family protein	not required
STMMW_04641	araJ	485401	486573	-1	343	0.127877	1173	150	transmembrane efflux protein	not required
STMMW_04651	sbcC	486746	489886	-1	932	0.112385	3141	353	exonuclease SbcC	not required
STMMW_04661	sbcD	489883	491085	-1	452	0.142976	1203	172	exonuclease SbcD	not required
STMMW_04671	phoB	491299	491988	1	1083	0.265217	690	183	phosphate regulon transcriptional regulatory protein PhoB	not required
STMMW_04681	phoR	492058	493353	1	551	0.16821	1296	218	phosphate regulon sensor protein PhoR	not required
STMMW_04691	brnQ	493762	495081	1	868	0.215152	1320	284	branched chain amino acid transport system II carrier protein	not required
STMMW_04701	proY	495156	496526	1	604	0.15609	1371	214	proline-specific permease ProY	not required
STMMW_04711	malZ	496688	498505	1	620	0.147415	1818	268	maltodextrin glucosidase	not required
STMMW_04721	tsaA	498577	499179	-1	178	0.126036	603	76	probable peroxidase	not required
STMMW_04731	yajB	499389	499970	-1	155	0.128866	582	75	conserved hypothetical protein	not required
STMMW_04741	queA	500064	501128	1	306	0.0976526	1065	104	S-adenosylmethionine:tRNA ribosyltransferase- isomerase	not required
STMMW_04751	tgt	501325	502452	1	229	0.0842199	1128	95	queuine tRNA-ribosyltransferase	not required
STMMW_04761	yajC	502475	502807	1	6	0.015015	333	5	putative membrane protein	required
STMMW_04771	secD	502835	504682	1	5	0.00270563	1848	5	protein-export membrane protein SecD	required
STMMW_04781	secF	504693	505664	1	18	0.0102881	972	10	protein-export membrane protein SecF	required
STMMW_04791	STMMW_04791	505812	506177	1	133	0.13388	366	49	conserved hypothetical protein	not required
STMMW_04801	STMMW_04801	506203	506895	1	231	0.11544	693	80	putative deoR-family transcriptional regulator	not required
STMMW_04811	yajD	507065	507412	1	108	0.12931	348	45	conserved hypothetical protein	not required
STMMW_04821	STMMW_04821	507660	507986	-1	99	0.107034	327	35	conserved hypothetical protein	not required
STMMW_04831	tsx	508041	508904	-1	304	0.115741	864	100	nucleoside-specific channel-forming protein tsx precursor	not required
STMMW_04841	yajI	509204	509743	-1	259	0.124074	540	67	putative lipoprotein	not required
STMMW_04851	nrdR	509895	510344	1	36	0.0466667	450	21	conserved hypothetical protein	required
STMMW_04861	ribD	510348	511451	1	8	0.00452899	1104	5	riboflavin biosynthesis protein RibD	required
STMMW_04871	ribH	511540	512010	1	0	0	471	0	6,7-dimethyl-8-ribityllumazine synthase (riboflavin synthase beta chain)	required
STMMW_04881	nusB	512031	512450	1	6	0.00952381	420	4	N utilization substance protein B	required
STMMW_04891	thiL	512529	513506	1	11	0.00408998	978	4	thiamine-monophosphate kinase	required
STMMW_04901	pgpA	513484	513999	1	209	0.155039	516	80	phosphatidylglycerophosphatase A	not required
STMMW_04911	yajO	514103	515077	-1	329	0.130256	975	127	putative oxidoreductase	not required
STMMW_04921	dxs	515134	516996	-1	27	0.00751476	1863	14	1-deoxyxylulose-5-phosphate synthase	required
STMMW_04931	ispA	517020	517919	-1	0	0	900	0	geranyltranstransferase	required
STMMW_04941	xseB	517920	518162	-1	2	0.00823045	243	2	exodeoxyribonuclease small subunit	required
STMMW_04951	thiI	518372	519820	1	270	0.0890269	1449	129	thiamine biosynthesis protein ThiI	not required
STMMW_04961	phnV	519864	520661	-1	627	0.265664	798	212	probable membrane component of 2- aminoethylphosphonate transporter	not required
STMMW_04971	phnU	520664	521524	-1	608	0.254355	861	219	probable membrane component of 2- aminoethylphosphonate transporter	not required
STMMW_04981	phnT	521527	522636	-1	729	0.205405	1110	228	probable ATP-binding component of 2- aminoethylphosphonate transporter	not required
STMMW_04991	phnS	522642	523586	-1	411	0.168254	945	159	probable periplasmic binding component of 2- aminoethylphosphonate transporter	not required
STMMW_05001	phnR	523853	524572	-1	432	0.205556	720	148	probable regulator of 2-aminoethylphosphonate uptake and metabolism operon	not required
STMMW_05011	phnW	524712	525815	1	1138	0.208333	1104	230	2-aminoethylphosphonate:pyruvate aminotransferase	not required
STMMW_05021	phnX	525822	526634	1	256	0.103321	813	84	phosphonoacetaldehyde phosphonohydrolase	not required
STMMW_05031	thiJ	526731	527321	-1	170	0.135364	591	80	4-methyl-5(b-hydroxyethyl)-thiazole monophosphate biosynthesis (ThiJ) protein	not required
STMMW_05041	apbA	527284	528195	-1	438	0.177632	912	162	2-dehydropantoate 2-reductase	not required
STMMW_05051	yajQ	528303	528812	1	127	0.105882	510	54	conserved hypothetical protein	not required
STMMW_05061	yajR	528859	530208	-1	136	0.0585185	1350	79	hpothetical major facilitator family transport protein	ambiguous
STMMW_05071	STMMW_05071	530451	530612	-1	134	0.277778	162	45		not required
STMMW_05081	STMMW_05081	530760	532271	1	738	0.164021	1512	248	putative exported protein	not required
STMMW_05091	STMMW_05091	532493	533776	1	485	0.147975	1284	190	conserved hypothetical protein	not required
STMMW_05101	cyoE	533858	534748	-1	57	0.0493827	891	44	cytochrome o ubiquinol oxidase C subunit	ambiguous
STMMW_05111	cyoD	534760	535089	-1	5	0.0121212	330	4	cytochrome o ubiquinol oxidase C subunit	required
STMMW_05121	cyoC	535089	535604	-1	25	0.0406977	516	21	cytochrome o ubiquinol oxidase subunit III	required
STMMW_05131	cyoB	535693	537684	-1	198	0.0481928	1992	96	cytochrome O ubiquinol oxidase subunit I	ambiguous
STMMW_05141	cyoA	537695	538651	-1	143	0.0877743	957	84	cytochrome o ubiquinol oxidase subunit II	not required
STMMW_05151	ampG	539104	540579	-1	947	0.224255	1476	331	AmpG protein	not required
STMMW_05161	yajG	540623	541255	-1	359	0.218009	633	138	putative lipoprotein	not required
STMMW_05171	bolA	541505	541822	1	95	0.138365	318	44	BolA protein	not required
STMMW_05181	tig	542169	543467	1	858	0.186297	1299	242	trigger factor	not required
STMMW_05191	clpP	543714	544337	1	0	0	624	0	ATP-dependent Clp protease proteolytic subunit	required
STMMW_05201	clpX	544589	545860	1	30	0.00471698	1272	6	ATP-dependent Clp protease ATP-binding subunit ClpX	required
STMMW_05211	lon	546046	548400	1	618	0.0089172	2355	21	Lon protease	required
STMMW_05221	hupB	548609	548881	1	785	0.516484	273	141	DNA-binding protein Hu-beta	not required
STMMW_05231	cypD	549172	551043	1	1096	0.208333	1872	390	peptidyl-prolyl cis-trans isomerase D	not required
STMMW_05241	comE1	551193	551567	1	269	0.277333	375	104	putative exported protein	not required
STMMW_05251	ybaW	551671	552069	1	289	0.258145	399	103	conserved hypothetical protein	not required
STMMW_05261	ybaX	552175	552870	-1	539	0.255747	696	178	conserved hypothetical protein	not required
STMMW_05271	ybaE	552935	554635	-1	1476	0.273369	1701	465	Putative solute-binding protein	not required
STMMW_05281	cof	554736	555554	1	680	0.267399	819	219	conserved hypothetical protein	not required
STMMW_05291	STMMW_05291	555604	556659	-1	692	0.264205	1056	279	putative lyase	not required
STMMW_05301	ybaO	556772	557230	1	407	0.28976	459	133	hypothetical transcriptional regulator	not required
STMMW_05311	mdlA	557271	559043	1	2259	0.326565	1773	579	putative ABC transporter ATP-binding membrane protein	not required
STMMW_05321	mdlB	559036	560817	1	2170	0.305836	1782	545	putative ABC transporter ATP-binding membrane protein	not required
STMMW_05331	glnK	561030	561368	1	258	0.280236	339	95	nitrogen regulatory protein P-II	not required
STMMW_05341	amtB	561400	562686	1	1021	0.227661	1287	293	probable ammonium transporter	not required
STMMW_05351	tesB	562786	563646	-1	252	0.126597	861	109	acyl-CoA thioesterase II	not required
STMMW_05361	ybaY	563861	564430	1	398	0.238596	570	136	conserved hypothetical lipoprotein	not required
STMMW_05371	ybaZ	564463	564852	-1	164	0.197436	390	77	putative methylated-DNA methyltransferase	not required
STMMW_05381	ylaB	565083	566633	-1	770	0.184397	1551	286	hypothetical 58.9 kDa protein in tesb-hha intergenic region. Contains probable N-terminal signal sequence	not required
STMMW_05391	rpmE2	566858	567118	1	106	0.0996169	261	26	putative 50S ribosomal protein L31 (second copy)	not required
STMMW_05401	rpmJa	567124	567264	1	12	0.035461	141	5	putative 50S ribosomal protein L36 (second copy)	required
STMMW_05411	ylaC	567320	567790	-1	118	0.116773	471	55	putative membrane protein	not required
STMMW_05421	maa	567907	568458	-1	443	0.262681	552	145	maltose O-acetyltransferase	not required
STMMW_05431	hha	568637	568855	-1	21	0.0684932	219	15	haemolysin expression modulating protein	ambiguous
STMMW_05441	ybaJ	568883	569257	-1	348	0.381333	375	143	conserved hypothetical protein	not required
STMMW_05451	acrB	569753	572902	-1	932	0.13619	3150	429	acriflavin resistance protein B	not required
STMMW_05461	acrA	572925	574118	-1	458	0.156616	1194	187	acriflavin resistance protein A precursor	not required
STMMW_05471	acrR	574260	574913	1	457	0.272171	654	178	potential acrAB operon repressor	not required
STMMW_05481	aefA	575032	578394	1	1712	0.204282	3363	687	integral membrane protein AefA	not required
STMMW_05491	STMMW_05491	578436	579371	-1	484	0.211538	936	198	conserved hypothetical protein	not required
STMMW_05501	ybaM	579441	579608	-1	22	0.0892857	168	15	conserved hypothetical protein	not required
STMMW_05511	priC	579622	580137	-1	242	0.147287	516	76	primosomal replication protein n	not required
STMMW_05521	STMMW_05521	580218	580595	1	142	0.174603	378	66	putative membrane protein	not required
STMMW_05531	apt	580748	581299	1	82	0.0724638	552	40	adenine phosphoribosyltransferase	ambiguous
STMMW_05541	dnaX	581413	583341	1	2	0.00103681	1929	2	DNA polymerase III subunits gamma and tau	required
STMMW_05551	ybaB	583363	583716	1	100	0.115819	354	41	conserved hypothetical protein	not required
STMMW_05561	recR	583716	584321	1	82	0.0808581	606	49	recombination protein RecR	not required
STMMW_05571	htpG	584408	586306	1	2159	0.279621	1899	531	heat shock protein HtpG	not required
STMMW_05581	adk	586547	587191	1	3	0.00155039	645	1	adenylate kinase	required
STMMW_05591	hemH	587420	588382	1	8	0.00623053	963	6	ferrochelatase	required
STMMW_05601	aes	588379	589350	-1	832	0.268519	972	261	acetyl esterase	not required
STMMW_05611	gsk	589503	590807	1	639	0.180077	1305	235	inosine-guanosine kinase	not required
STMMW_05621	ybaL	590856	592532	-1	594	0.138939	1677	233	putative transport protein	not required
STMMW_05631	fsr	592747	593967	-1	469	0.144963	1221	177	fosmidomycin resistance protein	not required
STMMW_05641	ushA	594140	595792	1	1087	0.240774	1653	398	UDP-sugar hydrolase	not required
STMMW_05651	ybaK	595909	596388	-1	94	0.102083	480	49	conserved hypothetical protein	not required
STMMW_05661	ybaP	596590	597384	-1	362	0.16478	795	131	conserved hypothetical protein	not required
STMMW_05671	STMMW_05671	597470	598297	-1	238	0.111111	828	92	probable secreted protein	not required
STMMW_05681	copA	598451	600952	-1	1660	0.223022	2502	558	copper-transporting ATPase	not required
STMMW_05691	cueR	601062	601478	1	164	0.139089	417	58	copper efflux regulator	not required
STMMW_05701	ybbJ	601479	601931	-1	302	0.203091	453	92	putative membrane protein	not required
STMMW_05711	ybbK	601928	602845	-1	512	0.180828	918	166	putative membrane protein	not required
STMMW_05721	ybbL	602992	603669	1	735	0.387906	678	263	putative ABC transporter ATP-binding protein	not required
STMMW_05731	ybbM	603656	604435	1	405	0.208974	780	163	putative membrane protein	not required
STMMW_05741	ybbN	604521	605375	-1	375	0.173099	855	148	thioredoxin-like protein	not required
STMMW_05751	ybbO	605435	606205	-1	523	0.211414	771	163	hypothetical oxidoreductase	not required
STMMW_05761	tesA	606360	606974	-1	302	0.204878	615	126	acyl-coA thioesterase I	not required
STMMW_05771	ybbA	606945	607631	1	606	0.250364	687	172	hypothetical ABC transporter ATP-binding protein	not required
STMMW_05781	ybbP	607628	610042	1	1089	0.166046	2415	401	putative membrane protein	not required
STMMW_05791	STMMW_05791	610228	611361	1	458	0.141975	1134	161	outer membrane protein	not required
STMMW_05801	sfbA	611618	612448	1	320	0.169675	831	141	lipoprotein	not required
STMMW_05811	sfbB	612485	613501	1	351	0.139626	1017	142	ABC transporter ATP-binding protein	not required
STMMW_05821	sfbC	613494	614153	1	331	0.172727	660	114	ABC transporter integral membrane protein	not required
STMMW_05831	ybbB	614192	615286	-1	346	0.122374	1095	134	hypothetical ATP-binding protein	not required
STMMW_05841	ybbS	615356	616282	-1	245	0.104639	927	97	hypothetical lysR-family transcriptional regulator	not required
STMMW_05851	allA	616509	616991	1	82	0.0807453	483	39	ureidoglycolate hydrolase	not required
STMMW_05861	allR	617070	617888	1	219	0.0976801	819	80	negative regulator of allantoin and glyoxylate utilization operons	not required
STMMW_05871	gcl	617973	619754	1	804	0.136364	1782	243	glyoxylate carboligase	not required
STMMW_05881	gip	619767	620543	1	279	0.138996	777	108	glyoxylate-induced protein	not required
STMMW_05891	garRa	620644	621522	1	559	0.23322	879	205	2-hydroxy-3-oxopropionate reductase	not required
STMMW_05901	STMMW_05901	621579	622835	1	722	0.229117	1257	288	putative permease	not required
STMMW_05911	allP	622931	623965	1	301	0.115942	1035	120		not required
STMMW_05921	ybbY	624189	625487	1	779	0.21786	1299	283	putative permease protein	not required
STMMW_05931	glxK	625510	626658	1	355	0.132289	1149	152	glycerate kinase 1	not required
STMMW_05941	ylbA	626738	627523	-1	611	0.290076	786	228	putative glyoxylate utilization	not required
STMMW_05951	allC	627534	628769	-1	545	0.145631	1236	180	allantoate amidohydrolase	not required
STMMW_05961	allD	628791	629840	-1	580	0.18381	1050	193	ureidoglycolate dehydrogenase	not required
STMMW_05971	fdrA	630171	631835	1	550	0.13994	1665	233	putative acyl-CoA synthetase, involved in protein transport	not required
STMMW_05981	ylbE	631845	633104	1	506	0.15	1260	189	conserved hypothetical protein	not required
STMMW_05991	ylbF	633116	633925	1	390	0.191358	810	155	conserved hypothetical protein	not required
STMMW_06001	arcC	633929	634822	1	436	0.161074	894	144	carbamate kinase	not required
STMMW_06011	purK	634863	635930	-1	438	0.164794	1068	176	phosphoribosylaminoimidazole carboxylase ATPase subunit	not required
STMMW_06021	purE	635927	636436	-1	137	0.111765	510	57	phosphoribosylaminoimidazole carboxylase catalytic subunit	not required
STMMW_06031	lpxH	636554	637276	-1	6	0.00829876	723	6	conserved hypothetical protein	required
STMMW_06041	ppiB	637279	637773	-1	1	0.0020202	495	1	peptidyl-prolyl cis-trans isomerase B	required
STMMW_06051	cysS	637946	639331	1	697	0.201299	1386	279	cysteinyl-tRNA synthetase	not required
STMMW_06061	STMMW_06061	639375	640199	-1	299	0.153939	825	127	putative exported outer membrane protein	not required
STMMW_06071	STMMW_06071	640196	640633	-1	208	0.155251	438	68	putative exported protein	not required
STMMW_06081	ybcI	640626	641171	-1	221	0.155678	546	85	putative membrane protein	not required
STMMW_06091	ybcJ	641299	641511	-1	85	0.169014	213	36	conserved hypothetical protein	not required
STMMW_06101	folD	641513	642379	-1	15	0.0138408	867	12	FolD bifunctional protein [includes: methylenetetrahydrofolate dehydrogenase	required
STMMW_06111	fimA	642926	643483	1	596	0.354839	558	198	type-1 fimbrial protein, a chain precursor	not required
STMMW_06121	fimI	643559	644092	1	299	0.174157	534	93	major pilin protein	not required
STMMW_06131	fimC	644136	644828	1	441	0.246753	693	171	fimbrial chaperone protein	not required
STMMW_06141	fimD	644859	647471	1	1413	0.181783	2613	475	outer membrane usher protein FimD precursor	not required
STMMW_06151	fimH	647486	648493	1	404	0.168651	1008	170	FimH protein precursor	not required
STMMW_06161	fimF	648503	649021	1	234	0.156069	519	81	putative fimbrial protein	not required
STMMW_06171	fimZ	649067	649699	-1	121	0.0647709	633	41	probable transcriptional regulator (FimXZ protein)	ambiguous
STMMW_06181	fimY	650303	651025	-1	708	0.343015	723	248	fimbriae Y protein	not required
STMMW_06191	STMMW_06191	651044	651355	-1	114	0.189103	312	59	hypothetical protein	not required
STMMW_06201	fimW	651517	652113	-1	201	0.177554	597	106	fimbriae w protein	not required
STMMW_06211	STMMW_06211	652585	652875	-1	203	0.274914	291	80		not required
STMMW_06221	STMMW_06221	653010	653228	-1	648	0.242009	219	53	transposase	not required
STMMW_06231	STMMW_06231	653615	655267	-1	179	0.0659407	1653	109		ambiguous
STMMW_06241	gtrBa	655248	656174	-1	543	0.22438	927	208	bactoprenol glucosyl transferase	not required
STMMW_06251	gtrAa	656171	656533	-1	445	0.275482	363	100	bactoprenol-linked glucose translocase	not required
STMMW_06261	STMMW_06261	657401	657730	-1	307	0.378788	330	125		not required
STMMW_06271	cusA	657779	658018	1	51	0.104167	240	25		not required
STMMW_06281	ykgD	658069	658923	-1	558	0.175439	855	150	hypothetical araC-family transcriptional regulator	not required
STMMW_06291	ykgC	659139	660464	1	745	0.182504	1326	242	probable pyridine nucleotide-disulfide oxidoreductase	not required
STMMW_06301	STMMW_06301	660621	660857	1	99	0.21519	237	51	hypothetical secreted protein	not required
STMMW_06311	ykgB	660870	661430	1	410	0.297683	561	167	putative membrane protein	not required
STMMW_06321	STMMW_06321	661509	662684	-1	302	0.104592	1176	123	conserved hypothetical protein	not required
STMMW_06331	pheP	663010	664404	1	610	0.143369	1395	200	phenylalanine-specific permease	not required
STMMW_06341	ybdG	664446	665693	-1	1232	0.336538	1248	420	putative membrane protein	not required
STMMW_06351	apeE	666004	667974	1	978	0.201928	1971	398	outer membrane esterase	not required
STMMW_06361	STMMW_06361	668141	670870	1	1409	0.170696	2730	466	similar to lmo0785 protein (sigma 54-associated activator)	not required
STMMW_06371	STMMW_06371	670998	671984	-1	548	0.201621	987	199	similar to a putative phospohtase isomerase	not required
STMMW_06381	STMMW_06381	672051	673094	-1	436	0.172414	1044	180	Putative GTP Binding protein	not required
STMMW_06391	STMMW_06391	673127	673981	-1	327	0.148538	855	127	putative mannose specific permease	not required
STMMW_06401	STMMW_06401	673984	674658	-1	308	0.117037	675	79	putative mannose specific permease	not required
STMMW_06411	STMMW_06411	674742	675212	-1	130	0.135881	471	64	putative mannose specific permease	not required
STMMW_06421	STMMW_06421	675190	675639	-1	110	0.124444	450	56	putative protein	not required
STMMW_06431	nfnB	675839	676492	-1	297	0.188073	654	123	oxygen-insensitive NAD(P)H nitroreductase	not required
STMMW_06441	ybdF	676589	676957	-1	209	0.181572	369	67	conserved hypothetical protein	not required
STMMW_06451	ramR	676957	677538	-1	602	0.290378	582	169	putative TetR-family transcriptional regulator	not required
STMMW_06461	ramA	677827	678168	1	108	0.125731	342	43	transcriptional activator RamA	not required
STMMW_06472	ybdJ	678174	678422	-1	143	0.104418	249	26	putative membrane protein	not required
STMMW_06481	ybdK	678489	679607	-1	438	0.168007	1119	188	conserved hypothetical protein	not required
STMMW_06491	entD	679619	680323	-1	250	0.126241	705	89	enterobactin synthetase component D	not required
STMMW_06501	fepA	680369	682624	-1	1138	0.160904	2256	363	ferrienterobactin receptor precursor	not required
STMMW_06511	fes	682813	684027	1	433	0.0847737	1215	103	enterochelin esterase	not required
STMMW_06521	ybdZ	684058	684276	1	68	0.123288	219	27	conserved hypothetical protein	not required
STMMW_06531	entF	684273	688157	1	772	0.0813385	3885	316	enterobactin synthetase component F	not required
STMMW_06541	fepE	688407	689543	1	778	0.212841	1137	242	ferric enterobactin transport protein	not required
STMMW_06551	fepC	689596	690390	-1	14	0.0163522	795	13	ferric enterobactin transport ATP-binding protein FepC	required
STMMW_06561	fepG	690387	691376	-1	50	0.0181818	990	18	ferric enterobactin transport protein FepG	required
STMMW_06571	fepD	691376	692383	-1	22	0.0138889	1008	14	ferric enterobactin transport protein FepD	required
STMMW_06581	ybdA	692494	693738	1	509	0.140562	1245	175	hypothetical membrane protein p43	not required
STMMW_06591	fepB	693801	694757	-1	16	0.0135841	957	13	ferrienterobactin-binding periplasmic protein precursor	required
STMMW_06601	entC	695066	696241	1	376	0.111395	1176	131	isochorismate synthase EntC	not required
STMMW_06611	entE	696251	697861	1	479	0.112973	1611	182	2,3-dihydroxybenzoate-AMP ligase	not required
STMMW_06621	entB	697875	698732	1	312	0.130536	858	112	isochorismatase	not required
STMMW_06631	entA	698732	699487	1	203	0.121693	756	92	2,3-dihydro-2,3-dihydroxybenzoate dehydrogenase	not required
STMMW_06641	ybdB	699490	699903	1	229	0.149758	414	62	conserved hypothetical protein	not required
STMMW_06651	cstAa	700085	702190	1	1132	0.192783	2106	406	carbon starvation protein A	not required
STMMW_06661	ybdD	702254	702451	1	71	0.161616	198	32	conserved hypothetical protein	not required
STMMW_06671	ybdH	702487	703575	-1	644	0.209366	1089	228	putative oxidoreductase	not required
STMMW_06681	ybdL	703702	704862	1	362	0.152455	1161	177	putative aminotransferase	not required
STMMW_06691	ybdM	704863	705480	-1	269	0.147249	618	91	conserved hypothetical protein	not required
STMMW_06701	ybdN	705453	706688	-1	621	0.157767	1236	195	conserved hypothetical protein	not required
STMMW_06711	ybdO	706854	707756	-1	159	0.118494	903	107	putative LysR-family transcriptional regulator	not required
STMMW_06721	dsbG	708073	708819	-1	219	0.140562	747	105	thiol:disulfide interchange protein DsbG precursor	not required
STMMW_06731	ahpC	709260	709823	1	192	0.120567	564	68	alkyl hydroperoxide reductase C22 protein	not required
STMMW_06741	ahpF	710065	711630	1	744	0.159004	1566	249	alkyl hydroperoxide reductase F52A protein (subunit F)	not required
STMMW_06751	STMMW_06751	711962	712522	1	162	0.15508	561	87	conserved hypothetical protein	not required
STMMW_06761	STMMW_06761	712515	714794	1	1255	0.204825	2280	467	molybdopterin-containing oxidoreductase catalytic subunit	not required
STMMW_06771	STMMW_06771	714791	715348	1	477	0.256272	558	143	molybdopterin-containing oxidoreductase iron- sulfur subunit	not required
STMMW_06781	STMMW_06781	715348	716115	1	520	0.235677	768	181	molybdopterin-containing oxidoreductase membrane anchor subunit	not required
STMMW_06791	ybdQ	716183	716611	-1	574	0.361305	429	155	conserved hypothetical protein	not required
STMMW_06801	ybdR	716834	718072	1	607	0.156578	1239	194	hypothetical zinc-dependant alcohol dehydrogenase	not required
STMMW_06811	rnk	718155	718565	-1	245	0.199513	411	82	regulator of nucleoside diphosphate kinase	not required
STMMW_06821	rna	718800	719606	-1	412	0.179678	807	145	ribonuclease I precursor	not required
STMMW_06831	citT	719716	721179	-1	1166	0.275273	1464	403	citrate carrier	not required
STMMW_06841	citG	721217	722113	-1	574	0.218506	897	196	citg protein	not required
STMMW_06851	citX	722085	722636	-1	488	0.259058	552	143	probable apo-citrate lyase phosphoribosyl- dephospho-coa transferase (ec 2.7.7.61) (holo-acp synthase) (holo-citrate lyase synthase) (apo-acp nucleodityltransferase)	not required
STMMW_06861	citF	722640	724169	-1	1040	0.219608	1530	336	citrate lyase alpha chain	not required
STMMW_06871	citE	724179	725087	-1	329	0.129813	909	118	citrate lyase beta chain	not required
STMMW_06881	citD	725084	725380	-1	225	0.245791	297	73	citrate lyase acyl carrier protein	not required
STMMW_06891	citC	725377	726453	-1	901	0.203343	1077	219	[citrate (PRO-3S)-lyase] ligase	not required
STMMW_06901	citA	726838	728499	1	921	0.209988	1662	349	twp component sensor kinase DpiB	not required
STMMW_06911	citB	728468	729148	1	489	0.302496	681	206	transcriptional regulator	not required
STMMW_06921	dcuC	729202	730455	-1	884	0.1874	1254	235	C4-dicarboxylate anaerobic carrier	not required
STMMW_06931	pagP	730966	731538	1	495	0.338569	573	194	antimicrobial peptide resistance and lipid A acylation protein	not required
STMMW_06941	cspE	731726	731935	1	83	0.138095	210	29	cold shock-like protein cspE	not required
STMMW_06951	ccrB	731993	732376	-1	24	0.0442708	384	17	putative membrane protein	required
STMMW_06961	ybeM	732467	733255	1	150	0.0823828	789	65	possible hydrolase	not required
STMMW_06971	tatE	733384	733587	1	65	0.142157	204	29	Sec-independent protein translocase protein	not required
STMMW_06981	lipA	733673	734638	-1	11	0.00414079	966	4	lipoic acid synthetase	required
STMMW_06991	ybeF	734844	735797	-1	823	0.230608	954	220	LysR-family transcriptional regulator	not required
STMMW_07001	lipB	736099	736674	-1	12	0.0190972	576	11	lipoate-protein ligase B (lipoate biosynthesis protein B)	required
STMMW_07011	ybeD	736840	737103	-1	13	0.0340909	264	9	conserved hypothetical protein	required
STMMW_07021	dacA	737212	738423	-1	291	0.105611	1212	128	D-alanine carboxypeptidase	not required
STMMW_07031	rlpA	738563	739708	-1	524	0.177138	1146	203	rare lipoprotein A precursor	not required
STMMW_07041	mrdB	739719	740831	-1	10	0.00449236	1113	5	rod shape-determining protein RodA	required
STMMW_07051	mrdA	740834	742735	-1	17	0.00630915	1902	12	penicillin-binding protein	required
STMMW_07061	ybeA	742766	743233	-1	235	0.25	468	117	conserved hypothetical protein	not required
STMMW_07071	ybeB	743237	743554	-1	136	0.201258	318	64	conserved hypothetical protein	not required
STMMW_07081	cobC	743883	744491	-1	794	0.187192	609	114	alpha-ribazole-5'-phosphate phosphatase	not required
STMMW_07091	cobD	744588	745682	1	546	0.173516	1095	190	putative aminotransferase CobD	not required
STMMW_07101	nadD	745657	746298	-1	57	0.0140187	642	9	conserved hypothetical protein	required
STMMW_07111	holA	746300	747331	-1	39	0.0232558	1032	24	DNA polymerase III, delta subunit	required
STMMW_07121	rlpB	747331	747921	-1	11	0.00338409	591	2	rare lipoprotein B precursor	required
STMMW_07131	leuS	747936	750518	-1	167	0.00696864	2583	18	leucyl-tRNA synthetase	required
STMMW_07141	STMMW_07141	750755	751096	1	125	0.122807	342	42	putative hydrolase N-terminus	not required
STMMW_07151	STMMW_07151	751113	752285	1	982	0.253197	1173	297	putative hydrolase C-terminus	not required
STMMW_07161	STMMW_07161	752404	753288	1	819	0.325424	885	288	probable permease	not required
STMMW_07171	STMMW_07171	753356	755284	1	1619	0.276827	1929	534	putative sigma-54 dependent transcriptional regulator	not required
STMMW_07181	ybeL	755377	755850	1	243	0.168776	474	80	conserved hypothetical protein	not required
STMMW_07191	ybeQ	755889	756884	-1	1482	0.339357	996	338	conserved hypothetical protein	not required
STMMW_07201	ybeR	757009	757716	1	535	0.289548	708	205	conserved hypothetical protein	not required
STMMW_07211	ybeS	757713	759146	1	1088	0.260112	1434	373	putative membrane protein	not required
STMMW_07221	ybeU	759158	759851	1	600	0.32853	694	228	putative conserved hypothetical protein (pseudogene)	not required
STMMW_07231	ybeV	759851	761323	1	1124	0.247115	1473	364		not required
STMMW_07241	hscC	761345	763024	-1	1184	0.224405	1680	377	chaperone heat shock protein	not required
STMMW_07251	STMMW_07251	763100	764338	-1	395	0.154964	1239	192	putative conserved hypothetical protein	not required
STMMW_07261	rihA	764370	765305	-1	437	0.155983	936	146	probable nucleoside hydrolase	not required
STMMW_07271	gltL	765422	766147	-1	479	0.201102	726	146	glutamate/aspartate transport ATP-binding protein GltL	not required
STMMW_07281	gltK	766147	766821	-1	381	0.191111	675	129	glutamate/aspartate transport system permease protein GltK	not required
STMMW_07291	gltJ	766821	767561	-1	451	0.221323	741	164	glutamate/aspartate transport system permease protein GltJ	not required
STMMW_07301	gltI	767721	768647	-1	313	0.13808	927	128	ABC transporter periplasmic binding protein (glutamate/aspartate?)	not required
STMMW_07311	lnt	768984	770522	-1	20	0.00909682	1539	14	apolipoprotein N-acyltransferase	required
STMMW_07321	ybeX	770542	771420	-1	226	0.121729	879	107	haemolysin-related protein	not required
STMMW_07331	ybeY	771578	772051	-1	33	0.035865	474	17	conserved hypothetical protein	required
STMMW_07341	phoL	772048	773133	-1	72	0.0368324	1086	40	PhoH-like ATP-binding protein	required
STMMW_07351	miaB	773299	774723	-1	1247	0.265263	1425	378	MiaB protein (putative tRNA-thiotransferase (or tRNA-methylthiotransferase))	not required
STMMW_07361	ubiF	774867	776042	1	16	0.00765306	1176	9	putative monooxygenase	required
STMMW_07371	STMMW_07371	776109	776684	-1	202	0.130208	576	75	putative exported protein	not required
STMMW_07381	asnB	777751	779415	-1	1078	0.208408	1665	347	asparagine synthetase B	not required
STMMW_07391	nagD	779705	780457	-1	561	0.197875	753	149	NagD protein	not required
STMMW_07401	nagC	780504	781724	-1	105	0.0532351	1221	65	N-acetylglucosamine repressor	ambiguous
STMMW_07411	nagA	781729	782883	-1	37	0.0138528	1155	16	N-acetylglucosamine-6-phosphate deacetylase	required
STMMW_07421	nagB	782943	783743	-1	356	0.15231	801	122	Glucosamine-6-phosphate deaminase	not required
STMMW_07431	nagE	784070	786022	1	1250	0.201229	1953	393	PTS system, N-acetylglucosamine-specific IIABC component	not required
STMMW_07441	glnS	786233	787900	1	36	0.0059952	1668	10	glutaminyl-tRNA synthetase	required
STMMW_07451	ybfM	788346	789752	1	974	0.273632	1407	385	putative outer membrane protein	not required
STMMW_07461	ybfN	789802	790134	1	251	0.288288	333	96	putative lipoprotein	not required
STMMW_07471	STMMW_07471	790183	791487	-1	1014	0.272031	1305	355	citrate-proton symporter	not required
STMMW_07481	STMMW_07481	791538	792677	-1	761	0.227193	1140	259	citrate utilization protein B	not required
STMMW_07491	STMMW_07491	792664	794067	-1	870	0.213675	1404	300	conserved hypothetical protein	not required
STMMW_07501	STMMW_07501	794165	795091	-1	641	0.223301	927	207	LysR-family transcriptional regulator	not required
STMMW_07511	fur	795206	795658	-1	24	0.0419426	453	19	ferric uptake regulation protein	required
STMMW_07521	fldA	795940	796470	-1	63	0.0301318	531	16	flavodoxin 1	required
STMMW_07531	ybfE	796633	796914	-1	254	0.255319	282	72	conserved hypothetical protein	not required
STMMW_07541	ybfF	797048	797818	-1	199	0.108949	771	84	putative esterase/lipase YbfF	not required
STMMW_07551	seqA	798003	798545	1	75	0.0405157	543	22	seqA protein	required
STMMW_07561	pgm	798615	800210	1	34	0.0181704	1596	29	phosphoglucomutase	required
STMMW_07571	STMMW_07571	800325	800810	-1	216	0.158436	486	77	possible 5-nitroimidazole antibiotic resistance	not required
STMMW_07581	potE	800875	802194	-1	911	0.25	1320	330	putrescine-ornithine antiporter	not required
STMMW_07591	speF	802191	804389	-1	1696	0.221919	2199	488	ornithine decarboxylase, inducible (ec 4.1.1.17)	not required
STMMW_07601	kdpE	805151	805828	-1	303	0.172566	678	117	KDP operon transcriptional regulatory protein	not required
STMMW_07611	kdpD	805825	808509	-1	1904	0.235009	2685	631	sensor protein KdpD	not required
STMMW_07621	kdpC	808506	809090	-1	525	0.280342	585	164	potassium-transporting ATPase C chain	not required
STMMW_07631	kdpB	809099	811147	-1	1741	0.290874	2049	596	potassium-transporting ATPase B chain	not required
STMMW_07641	kdpA	811168	812847	-1	1575	0.309524	1680	520	potassium-transporting ATPase A chain	not required
STMMW_07642	kdpF	812847	812936	-1	45	0.288889	90	26	conserved sORF	not required
STMMW_07651	ybfA	813273	813479	1	132	0.217391	207	45	putative exported protein	not required
STMMW_07661	phrB	813590	815011	1	841	0.208158	1422	296	deoxyribodipyrimidine photolyase	not required
STMMW_07671	ybgH	815050	816531	-1	988	0.231444	1482	343	PTR2-family transport protein	not required
STMMW_07681	ybgI	816860	817603	1	472	0.204301	744	152	conserved hypothetical protein	not required
STMMW_07691	ybgJ	817619	818275	1	315	0.173516	657	114	conserved hypothetical protein	not required
STMMW_07701	ybgK	818269	819201	1	477	0.192926	933	180	conserved hypothetical protein	not required
STMMW_07711	ybgL	819191	819925	1	253	0.117007	735	86	conserved hypothetical protein	not required
STMMW_07721	STMMW_07721	820249	820380	1	78	0.257576	132	34	putative protein	not required
STMMW_07731	fimB	820440	821006	1	315	0.227513	567	129	putative type 1 fimbriae regulatory protein	not required
STMMW_07741	STMMW_07741	821466	821801	1	231	0.178571	336	60	putative protein	not required
STMMW_07751	STMMW_07751	821803	822543	1	334	0.117409	741	87	putative transport protein	not required
STMMW_07761	STMMW_07761	822829	823980	1	27	0.0121528	1152	14	putative UDP-galactopyranose mutase	required
STMMW_07771	STMMW_07771	823977	824873	1	10	0.00668896	897	6	putative glycosyl transferase	required
STMMW_07781	STMMW_07781	824886	826019	1	17	0.00705467	1134	8	galactosyltransferase	required
STMMW_07791	STMMW_07791	826148	826918	1	116	0.0544747	771	42	O-antigen export system, permease protein	ambiguous
STMMW_07801	STMMW_07801	826922	827632	1	9	0.00984529	711	7	ABC transporter domain protein	required
STMMW_07811	STMMW_07811	827726	829504	1	17	0.00393479	1779	7	putative glycosyltransferase, cell wall biogenesis	required
STMMW_07821	STMMW_07821	829697	830530	1	3	0.00239808	834	2	putative glycosyltransferase, cell wall biogenesis	required
STMMW_07831	STMMW_07831	830588	832482	1	138	0.0348285	1895	66	putative glycosyl transferase (pseudogene)	required
STMMW_07841	STMMW_07841	832550	832687	1	139	0.427536	138	59	conserved hypothetical cytoplasmic protein	not required
STMMW_07851	nei	832736	833527	1	309	0.161616	792	128	endonuclease VIII, DNA N-glycosylase with an AP lyase activity	not required
STMMW_07861	abrB	833582	834544	-1	451	0.182762	963	176	putative membrane protein	not required
STMMW_07871	gltA	834765	836048	-1	91	0.0319315	1284	41	citrate synthase	required
STMMW_07881	STMMW_07881	836023	836394	1	109	0.16129	372	60	putative exported protein	not required
STMMW_07891	sdhC	836803	837192	1	11	0.0230769	390	9	succinate dehydrogenase cytochrome b-556 subunit	required
STMMW_07901	sdhD	837186	837533	1	44	0.045977	348	16	succinate dehydrogenase hydrophobic membrane anchor protein	required
STMMW_07911	sdhA	837533	839299	1	119	0.0277306	1767	49	succinate dehydrogenase flavoprotein subunit	required
STMMW_07921	sdhB	839313	840032	1	28	0.025	720	18	succinate dehydrogenase iron-sulfur protein	required
STMMW_07931	sucA	840556	843357	1	22	0.00392577	2802	11	2-oxoglutarate dehydrogenase E1 component	required
STMMW_07941	sucB	843372	844580	1	20	0.00413565	1209	5	dihydrolipoamide succinyltransferase component (E2)	required
STMMW_07951	sucC	844722	845888	1	11	0.00685518	1167	8	succinyl-CoA synthetase beta chain	required
STMMW_07961	sucD	845888	846757	1	12	0.0126437	870	11	succinyl-CoA synthetase alpha chain	required
STMMW_07971	cydA	848340	849908	1	11	0.00446144	1569	7	cytochrome D ubiquinol oxidase subunit I	required
STMMW_07981	cydB	849924	851063	1	8	0.00614035	1140	7	cytochrome D ubiquinol oxidase subunit II	required
STMMW_07991	ybgT	851078	851191	1	0	0	114	0	putative membrane protein	required
STMMW_08001	ybgE	851328	851609	1	134	0.180851	282	51	putative membrane protein	not required
STMMW_08011	ybgC	851838	852242	1	191	0.165432	405	67	conserved hypothetical protein	not required
STMMW_08021	tolQ	852239	852931	1	13	0.00865801	693	6	TolQ protein	required
STMMW_08031	tolR	852935	853363	1	22	0.020979	429	9	tolR protein	required
STMMW_08041	tolA	853428	854651	1	29	0.0163399	1224	20	TolA protein	required
STMMW_08051	tolB	854775	856067	1	25	0.0123743	1293	16	tolB protein precursor	required
STMMW_08061	pal	856102	856626	1	21	0.0114286	525	6	peptidoglycan-associated lipoprotein precursor	required
STMMW_08071	ybgF	856636	857424	1	383	0.192649	789	152	putative exported protein	not required
STMMW_08081	nadA	858889	859932	1	629	0.200192	1044	209	quinolinate synthetase A protein	not required
STMMW_08091	pnuC	859957	860676	1	313	0.141667	720	102	pnuC protein	not required
STMMW_08101	ybgR	860673	861611	-1	492	0.160809	939	151	probable cation transport protein	not required
STMMW_08111	ybgS	861721	862107	-1	338	0.320413	387	124	putative exported protein	not required
STMMW_08121	aroG	862427	863479	1	341	0.11491	1053	121	phospho-2-dehydro-3-deoxyheptonate aldolase (DAHP synthetase) phenylalanine repressible	not required
STMMW_08131	STMMW_08131	863573	864118	-1	215	0.152015	546	83	putative hydro-lyase	not required
STMMW_08141	STMMW_08141	864133	864978	-1	160	0.0768322	846	65	putative hydro-lyase	not required
STMMW_08151	STMMW_08151	865147	865998	1	42	0.0211268	852	18	LysR-family transcriptional regulator	required
STMMW_08161	STMMW_08161	865999	866982	-1	107	0.0497967	984	49	LysR-family transcriptional regulator	ambiguous
STMMW_08171	STMMW_08171	867205	868473	1	12	0.00788022	1269	10	putative cation transporter	required
STMMW_08181	dcoC	868523	868768	1	236	0.382114	246	94	oxaloacetate decarboxylase gamma chain (ec 4.1.1.3)	not required
STMMW_08191	dcoA	868784	870559	1	1628	0.30518	1776	542	oxaloacetate decarboxylase alpha chain (ec 4.1.1.3)	not required
STMMW_08201	dcoB	870572	871873	1	1557	0.363287	1302	473	oxaloacetate decarboxylase beta chain (ec 4.1.1.3)	not required
STMMW_08211	STMMW_08211	871992	872690	1	330	0.173104	699	121	conserved hypothetical protein	not required
STMMW_08221	STMMW_08221	873070	874149	1	588	0.225926	1080	244	ABC transporter permease (FecCD_family)	not required
STMMW_08231	STMMW_08231	874149	874925	1	386	0.155727	777	121	ABC transporter ATP-binding protein	not required
STMMW_08241	gpmA	875016	875768	-1	54	0.0491368	753	37	phosphoglycerate mutase 1	ambiguous
STMMW_08251	galM	875992	877032	-1	556	0.201729	1041	210	aldose 1-epimerase (mutarotase)	not required
STMMW_08261	galK	877026	878174	-1	698	0.225413	1149	259	galactokinase	not required
STMMW_08271	galT	878177	879223	-1	319	0.118434	1047	124	galactose-1-phosphate uridylyltransferase	not required
STMMW_08281	galE	879234	880250	-1	397	0.167158	1017	170	UDP-glucose 4-epimerase	not required
STMMW_08291	STMMW_08291	880473	881381	-1	549	0.163916	909	149	putative membrane protein	not required
STMMW_08301	modF	881552	883027	-1	911	0.223577	1476	330	putative molybdenum transport ATP-binding protein ModF (photorepair protein PhrA)	not required
STMMW_08311	modE	883095	883883	-1	590	0.17744	789	140	putative molybdenum transport protein ModE	not required
STMMW_08321	ybhT	883910	884161	1	84	0.126984	252	32	putative membrane protein	not required
STMMW_08331	modA	884328	885101	1	289	0.144703	774	112	molybdate-binding periplasmic protein precursor	not required
STMMW_08341	modB	885101	885790	1	424	0.215942	690	149	molybdenum transport system permease protein ModB	not required
STMMW_08351	modC	885793	886851	1	700	0.216242	1059	229	molybdenum transport ATP-binding protein ModC	not required
STMMW_08361	ybhA	886852	887670	-1	526	0.196581	819	161	conserved hypothetical protein	not required
STMMW_08371	ybhE	887834	888829	1	173	0.0883534	996	88	conserved hypothetical protein	not required
STMMW_08381	ybhC	888973	890256	-1	811	0.228193	1284	293	possible pectinesterase precursor	not required
STMMW_08391	hutI	890494	891717	1	531	0.163399	1224	200	imidazolonepropionase	not required
STMMW_08401	hutG	891714	892655	1	231	0.11465	942	108	formiminoglutamase	not required
STMMW_08411	hutC	892748	893425	1	608	0.280236	678	190	histidine utilization repressor	not required
STMMW_08421	hutU	893622	895307	1	1072	0.205219	1686	346	urocanate hydratase	not required
STMMW_08431	hutH	895309	896829	1	1176	0.244576	1521	372	histidine ammonia-lyase	not required
STMMW_08441	ybhB	896914	897390	-1	480	0.316562	477	151	conserved hypothetical protein	not required
STMMW_08451	bioA	897448	898737	-1	1065	0.263566	1290	340	adenosylmethionine-8-amino-7-oxononanoate aminotransferase	not required
STMMW_08461	bioB	898824	899864	1	859	0.29683	1041	309	biotin synthetase	not required
STMMW_08471	bioF	899861	901018	1	863	0.202073	1158	234	8-amino-7-oxononanoate synthase	not required
STMMW_08481	bioC	901002	901757	1	517	0.239418	756	181	biotin synthesis protein BioC	not required
STMMW_08491	bioDa	901750	902436	1	477	0.19214	687	132	dethiobiotin synthetase	not required
STMMW_08501	uvrB	903087	905108	1	612	0.122156	2022	247	excision nuclease ABC subunit B	not required
STMMW_08511	STMMW_08511	905417	905590	1	69	0.16092	174	28	putative cytoplasmic protein	not required
STMMW_08521	slrP	905598	907895	1	2199	0.378155	2298	869	leucine rich repeat	not required
STMMW_08531	ybhK	907987	908895	-1	327	0.148515	909	135	conserved hypothetical protein	not required
STMMW_08541	moaA	909292	910281	1	405	0.125253	990	124	molybdenum cofactor biosynthesis protein A	not required
STMMW_08551	moaB	910303	910815	1	204	0.1423	513	73	molybdenum cofactor biosynthesis protein B	not required
STMMW_08561	moaC	910818	911303	1	231	0.158436	486	77	molybdenum cofactor biosynthesis protein C	not required
STMMW_08571	moaD	911290	911541	1	92	0.111111	252	28	molybdopterin converting factor, subunit 1	not required
STMMW_08581	moaE	911543	911995	1	98	0.10596	453	48	molybdopterin converting factor, subunit 2	not required
STMMW_08591	ybhL	912043	912747	1	908	0.283688	705	200	putative membrane protein	not required
STMMW_08601	ybhM	912894	913601	1	55	0.0451977	708	32	putative membrane protein	required
STMMW_08611	STMMW_08611	913625	914233	1	92	0.0689655	609	42	putative inner membrane protein	ambiguous
STMMW_08621	STMMW_08621	914241	914801	1	472	0.372549	561	209	putative inner membrane protein	not required
STMMW_08631	ybhN	914804	915766	-1	432	0.188993	963	182	putative membrane protein	not required
STMMW_08641	ybhO	915766	917007	-1	678	0.200483	1242	249	putative phospholipase	not required
STMMW_08651	ybhP	917004	917762	-1	444	0.16469	759	125	conserved hypothetical protein	not required
STMMW_08661	ybhQ	917895	918305	1	293	0.250608	411	103	putative membrane protein	not required
STMMW_08671	ybhR	918267	919373	-1	837	0.258356	1107	286	putative inner membrane protein	not required
STMMW_08681	ybhS	919489	920619	-1	1066	0.282051	1131	319	putative inner membrane protein	not required
STMMW_08691	ybhF	920612	922348	-1	1808	0.310881	1737	540	hypothetical ABC transporter ATP-binding protein	not required
STMMW_08701	STMMW_08701	922341	923336	-1	1089	0.312249	996	311	HlyD-family secretion protein	not required
STMMW_08711	ybiH	923336	924010	-1	558	0.259259	675	175	hypothetical tetR-family transcriptional regulator	not required
STMMW_08721	rhlE	924240	925604	1	901	0.21978	1365	300	putative ATP-dependent RNA helicase rhlE	not required
STMMW_08731	dinG	925911	927956	1	1153	0.190616	2046	390	probable ATP-dependent helicase	not required
STMMW_08741	ybiB	927986	928960	1	523	0.180513	975	176	putative glycosyltransferase	not required
STMMW_08751	ybiJ	929116	929376	-1	63	0.111111	261	29	putative exported protein	not required
STMMW_08761	ybiI	929661	929927	-1	55	0.123596	267	33	hypothetical Zinc-finger containing protein	not required
STMMW_08771	ybiN	930132	931058	1	388	0.148867	927	138	conserved hypothetical protein	not required
STMMW_08781	ybiO	931055	933277	-1	960	0.158345	2223	352	putative membrane protein	not required
STMMW_08791	glnQ	933396	934118	-1	310	0.138313	723	100	glutamine transport ATP-binding protein GlnQ	not required
STMMW_08801	glnP	934115	934774	-1	248	0.15303	660	101	glutamine transport system permease protein GlnP	not required
STMMW_08811	glnH	934918	935664	-1	442	0.227577	747	170	glutamine-binding periplasmic protein precursor	not required
STMMW_08821	dps	936141	936644	-1	268	0.242063	504	122	DNA protection during starvation protein	not required
STMMW_08831	ybiF	936947	937834	-1	608	0.25	888	222	putative membrane protein	not required
STMMW_08841	ompX	938188	938703	1	237	0.151163	516	78	outer membrane protein x precursor	not required
STMMW_08851	ybiP	938766	940342	-1	645	0.171211	1577	270	putative membrane protein (pseudogene)	not required
STMMW_08861	mntR	940921	941394	1	235	0.132911	474	63	transcriptional regulator (iron dependant repressor family)	not required
STMMW_08871	ybiR	941391	942503	1	548	0.172507	1113	192	putative membrane protein	not required
STMMW_08881	ybiS	942547	943467	-1	314	0.148751	921	137	putative exported protein	not required
STMMW_08891	ybiT	943686	945278	1	536	0.115505	1593	184	ABC transporter ATP-binding protein	not required
STMMW_08901	STMMW_08901	945887	946630	1	370	0.233871	744	174	conserved hypothetical protein	not required
STMMW_08911	ybiV2	946659	947189	-1	582	0.386064	531	205	conserved hypothetical protein	not required
STMMW_08921	ybiU	947583	948848	-1	531	0.157978	1266	200	conserved hypothetical protein	not required
STMMW_08931	ybiV1	949110	949919	1	404	0.164198	810	133	conserved hypothetical protein	not required
STMMW_08941	pflF	949997	952429	-1	2134	0.26305	2433	640	putative formate acetyltransferase 3	not required
STMMW_08951	pflE	952435	953334	-1	659	0.235556	900	212	putative pyruvate formate-lyase 3 activating enzyme	not required
STMMW_08961	moeB	953612	954361	-1	553	0.242667	750	182	molybdopterin biosynthesis MoeB protein	not required
STMMW_08971	moeA	954361	955602	-1	710	0.208535	1242	259	molybdopterin biosynthesis MoeA protein	not required
STMMW_08981	ybiK	955799	956740	1	609	0.220807	942	208	putative L-asparaginase	not required
STMMW_08991	yliA	956751	958622	1	953	0.198718	1872	372	hypothetical ABC transporter ATP-binding protein	not required
STMMW_09001	yliB	958655	960193	1	2321	0.307992	1539	474	putative ABC transporter periplasmic binding protein	not required
STMMW_09011	yliC	960254	961174	1	364	0.159609	921	147	hypothetical ABC transporter permease protein	not required
STMMW_09021	yliD	961177	962088	1	374	0.177632	912	162	hypothetical ABC transporter permease protein	not required
STMMW_09031	rimO	962179	963504	-1	601	0.159879	1326	212	conserved hypothetical protein	not required
STMMW_09041	bssR	963735	964118	1	187	0.0963542	384	37	conserved hypothetical protein	not required
STMMW_09051	STMMW_09051	964831	965346	1	19	0.0193798	516	10	conserved hypothetical protein	required
STMMW_09061	STMMW_09061	965264	966118	1	42	0.0245614	855	21	putative electron transfer flavoprotein (beta subunit)	required
STMMW_09071	STMMW_09071	966129	967076	1	276	0.0938819	948	89	putative electron transfer flavoprotein (alpha subunit)	not required
STMMW_09081	STMMW_09081	967370	968533	1	798	0.225945	1164	263	putative acyl-CoA dehydrogenase	not required
STMMW_09091	STMMW_09091	968982	970667	1	589	0.145907	1686	246	putative flavoprotein	not required
STMMW_09101	STMMW_09101	970673	971563	-1	380	0.207632	891	185	LysR transcriptional regulator	not required
STMMW_09111	STMMW_09111	971828	972253	-1	602	0.434272	426	185	putative inner membrane protein	not required
STMMW_09121	yliI	972600	973280	1	359	0.176211	681	120	putative dehydrogenase	not required
STMMW_09131	yliJ	973277	973903	-1	231	0.14673	627	92	glutathione s-transferase family protein	not required
STMMW_09141	dacC	974147	975349	1	629	0.153782	1203	185	D-alanyl-D-alanine carboxypeptidase (penicillin- binding protein 6 precursor)	not required
STMMW_09151	deoR	975394	976152	-1	462	0.250329	759	190	deoxyribose operon repressor	not required
STMMW_09161	ybjG	976224	976832	-1	603	0.288998	609	176	putative permease protein	not required
STMMW_09171	mdfA	977145	978377	1	690	0.180049	1233	222	multidrug translocase MdfA	not required
STMMW_09181	STMMW_09181	978431	979246	-1	449	0.20098	816	164	conserved hypothetical protein	not required
STMMW_09191	STMMW_09191	979243	980454	-1	709	0.211221	1212	256	putative membrane protein	not required
STMMW_09201	STMMW_09201	980622	981242	1	423	0.231884	621	144	putative TetR-family transcriptional regulator	not required
STMMW_09211	STMMW_09211	981359	983044	-1	1056	0.235469	1686	397	putative membrane protein	not required
STMMW_09221	ybjM	983315	983692	1	242	0.261905	378	99	putative membrane protein	not required
STMMW_09231	grxA	983724	983987	-1	69	0.147727	264	39	glutaredoxin 1	not required
STMMW_09241	ybjC	984157	984447	1	176	0.230241	291	67	putative putative membrane protein	not required
STMMW_09251	mdaA	984494	985153	1	339	0.169697	660	112	oxygen-insensitive NADPH nitroreductase	not required
STMMW_09261	rimK	985211	986113	1	387	0.170543	903	154	ribosomal protein S6 modification protein	not required
STMMW_09271	ybjN	986210	986686	1	122	0.125786	477	60	conserved hypothetical protein	not required
STMMW_09281	potF	987035	988147	1	419	0.166217	1113	185	putrescine-binding periplasmic protein precursor	not required
STMMW_09291	potG	988235	989368	1	651	0.204586	1134	232	putrescine transport ATP-binding protein PotG	not required
STMMW_09301	potH	989378	990331	1	585	0.234801	954	224	putrescine transport system permease protein PotH	not required
STMMW_09311	potI	990328	991173	1	500	0.198582	846	168	putrescine transport system permease protein PotI	not required
STMMW_09321	ybjO	991247	991720	1	285	0.229958	474	109	putative membrane protein	not required
STMMW_09331	rumB	991763	992893	1	568	0.152962	1131	173	hypothetical RNA methyltransferase	not required
STMMW_09341	STMMW_09341	993176	994519	1	734	0.188988	1344	254	possible transport protein	not required
STMMW_09351	STMMW_09351	994549	994869	1	141	0.267913	321	86	putative phosphotransferase enzyme II, B component	not required
STMMW_09361	STMMW_09361	994879	996366	1	439	0.141801	1488	211	probable sulfatase	not required
STMMW_09371	artJ	996585	997316	-1	201	0.132514	732	97	arginine-binding periplasmic protein 2 precursor	not required
STMMW_09381	artM	997553	998221	-1	334	0.219731	669	147	arginine transport system permease protein ArtM	not required
STMMW_09391	artQ	998221	998937	-1	354	0.209205	717	150	arginine transport system permease protein ArtQ	not required
STMMW_09401	artI	998944	999675	-1	421	0.189891	732	139	arginine-binding periplasmic protein 1 precursor	not required
STMMW_09411	artP	999693	1000421	-1	364	0.174211	729	127	arginine transport ATP-binding protein ArtP	not required
STMMW_09421	ybjP	1000651	1001166	-1	221	0.162791	516	84	probable lipoprotein	not required
STMMW_09431	STMMW_09431	1001294	1001617	1	170	0.17284	324	56	conserved hypothetical protein	not required
STMMW_09441	ybjR	1001614	1002444	1	403	0.145608	831	121	putative N-acetylmuramoyl-L-alanine amidase	not required
STMMW_09451	STMMW_09451	1002441	1003454	-1	488	0.177515	1014	180	putative oxidoreductase	not required
STMMW_09461	ybjT	1003550	1004983	-1	584	0.156206	1434	224	conserved hypothetical protein	not required
STMMW_09471	ltaA	1004994	1005980	-1	708	0.233029	987	230	L-allo-threonine aldolase	not required
STMMW_09481	poxB	1006019	1007737	-1	1406	0.251309	1719	432	pyruvate dehydrogenase	not required
STMMW_09491	hcr	1007895	1008866	-1	809	0.233539	972	227	NADH oxidoreductase Hcr	not required
STMMW_09501	hcp	1008875	1010527	-1	1294	0.23291	1653	385	prismane protein homolog (hybrid-cluster protein)	not required
STMMW_09511	ybjE	1010671	1011462	-1	931	0.349747	792	277	putative membrane protein	not required
STMMW_09521	ybjD	1011772	1013430	1	606	0.157324	1659	261	conserved hypothetical protein	not required
STMMW_09531	ybjX	1013427	1014395	-1	2075	0.50774	969	492	putative virK protein	not required
STMMW_09541	macA	1014523	1015641	1	725	0.252011	1119	282	putative exported protein	not required
STMMW_09551	macB	1015638	1017582	1	1046	0.193316	1945	376	conserved hypothetical ABC transporter (pseudogene)	not required
STMMW_09561	cspD	1017712	1017933	-1	69	0.144144	222	32	cold shock-like protein	not required
STMMW_09571	clpS	1018257	1018577	1	80	0.124611	321	40	conserved hypothetical protein	not required
STMMW_09581	clpA	1018608	1020884	1	608	0.116381	2277	265	ATP-dependent Clp protease ATP-binding subunit ClpA	not required
STMMW_09591	tnp	1021076	1021534	1	2216	0.825708	459	379	transposase for the IS1541 insertion element	not required
STMMW_09601	STMMW_09601	1021997	1022680	-1	494	0.261696	684	179	putative integrase protein	not required
STMMW_09602	STMMW_09602	1022683	1022841	-1	128	0.308176	159	49	conserved hypothetical protein	not required
STMMW_09611	STMMW_09611	1022851	1023252	-1	252	0.283582	402	114	ISPsy11, transposase OrfA	not required
STMMW_09621	STMMW_09621	1023589	1024266	-1	364	0.219764	678	149	conserved hypothetical protein	not required
STMMW_09631	STMMW_09631	1024286	1025146	-1	511	0.203252	861	175	putative pirin-related protein	not required
STMMW_09641	STMMW_09641	1025255	1026166	1	1797	0.288377	912	263	hypothetical transcriptional activator	not required
STMMW_09651	infA	1026257	1026475	-1	184	0.118721	219	26	initiation factor IF-1	not required
STMMW_09661	STMMW_09661	1026403	1026732	-1	65	0.0909091	330	30	inner membrane protein	not required
STMMW_09671	aat	1026787	1027491	-1	239	0.130496	705	92	leucyl/phenylalanyl-tRNA-protein transferase	not required
STMMW_09681	cydC	1027536	1029257	-1	104	0.0203252	1722	35	transport ATP-binding protein CydC	required
STMMW_09691	cydD	1029258	1031024	-1	28	0.00792303	1767	14	transport ATP-binding protein CydD	required
STMMW_09701	trxB	1031138	1032106	-1	81	0.0485036	969	47	thioredoxin reductase	ambiguous
STMMW_09711	lrp	1032652	1033146	1	106	0.10101	495	50	leucine-responsive regulatory protein	not required
STMMW_09721	ftsK	1033224	1037366	1	25	0.00265508	4143	11	cell division protein FtsK	required
STMMW_09731	lolA	1037506	1038120	1	24	0.00650407	615	4	outer membrane lipoprotein carrier protein precursor	required
STMMW_09741	ycaJ	1038130	1039473	1	813	0.185268	1344	249	conserevd hypothetical protein	not required
STMMW_09751	serS	1039732	1041024	1	9	0.00154679	1293	2	seryl-tRNA synthetase	required
STMMW_09761	dmsA	1041261	1043705	1	1760	0.242127	2445	592	anaerobic dimethyl sulfoxide reductase chain A precursor	not required
STMMW_09771	dmsB	1043716	1044333	1	607	0.297735	618	184	anaerobic dimethyl sulfoxide reductase chain B	not required
STMMW_09781	dmsC	1044335	1045198	1	959	0.326389	864	282	anaerobic dimethyl sulfoxide reductase chain C	not required
STMMW_09791	ycaD	1045548	1046696	1	764	0.195822	1149	225	probable transport protein	not required
STMMW_09801	ycaM	1046914	1048335	1	1802	0.42827	1422	609	probable transport protein	not required
STMMW_09811	pflA	1048628	1049452	-1	651	0.29697	825	245	pyruvate formate-lyase 1 activating enzyme	not required
STMMW_09821	STMMW_09821	1049544	1049870	-1	437	0.299694	327	98	putative conserved hypothetical protein	not required
STMMW_09831	sopD2	1050001	1050960	1	304	0.08125	960	78	putative sopD2 type III secretion system effector protein	not required
STMMW_09841	pflB	1051036	1053318	-1	1155	0.199299	2283	455	formate acetyltransferase 1	not required
STMMW_09851	focA	1053378	1054235	-1	590	0.29021	858	249	probable formate transporter (formate channel)	not required
STMMW_09861	ycaO	1054640	1056400	-1	1230	0.281658	1761	496	conserved hypothetical protein	not required
STMMW_09871	ycaP	1056537	1057229	1	527	0.242424	693	168	putative membrane protein	not required
STMMW_09881	serC	1057415	1058503	1	581	0.177227	1089	193	phosphoserine aminotransferase	not required
STMMW_09891	aroA	1058574	1059857	1	731	0.200156	1284	257	3-phosphoshikimate 1-carboxyvinyltransferase	not required
STMMW_09901	ycaL	1060000	1060761	1	432	0.206037	762	157	putative lipoprotein	not required
STMMW_09911	cmk	1060934	1061617	1	4	0.00438596	684	3	cytidylate kinase	required
STMMW_09921	rpsA	1061731	1063404	1	59	0.00896057	1674	15	30S ribosomal protein S1	required
STMMW_09931	himD	1063560	1063844	1	41	0.0842105	285	24	integration host factor beta-subunit (IHF-beta)	not required
STMMW_09941	rec2	1064074	1066338	1	1805	0.252097	2265	571	putative competence-related protein	not required
STMMW_09951	msbA	1066375	1068123	1	4	0.00228702	1749	4	probable transport ATP-binding protein MsbA	required
STMMW_09961	lpxK	1068120	1069097	1	23	0.00920245	978	9	tetraacyldisaccharide 4'-kinase	required
STMMW_09971	ycaQ	1069141	1070373	1	829	0.207624	1233	256	conserved hypothetical protein	not required
STMMW_09981	ycaR	1070425	1070607	1	0	0	183	0	conserved hypothetical protein	required
STMMW_09991	kdsB	1070604	1071350	1	8	0.00669344	747	5	3-deoxy-manno-octulosonate cytidylyltransferase	required
STMMW_10001	STMMW_10001	1071561	1072454	1	586	0.211409	894	189	conserved hypothetical protein	not required
STMMW_10011	ycbC	1072434	1073210	-1	377	0.207207	777	161	putative membrane protein	not required
STMMW_10021	smtA	1073346	1074149	1	272	0.115672	804	93	SmtA protein	not required
STMMW_10031	mukF	1074142	1075464	1	24	0.00377929	1323	5	killing factor KicB	required
STMMW_10041	mukE	1075445	1076149	1	26	0.0070922	705	5	KicA protein	required
STMMW_10051	mukB	1076149	1080615	1	752	0.0257443	4467	115	cell division protein	required
STMMW_10061	ycbB	1080960	1082801	1	1062	0.190554	1842	351	putative exported protein	not required
STMMW_10071	ycbK	1083061	1083609	1	213	0.134791	549	74	putative exported protein	not required
STMMW_10081	ycbL	1083637	1084284	1	314	0.16821	648	109	conserved hypothetical protein	not required
STMMW_10091	aspC	1084346	1085536	-1	103	0.0428212	1191	51	aspartate aminotransferase	required
STMMW_10101	ompF	1085721	1086812	-1	277	0.106227	1092	116	outer membrane protein F precursor	not required
STMMW_10111	asnCa	1087419	1088819	-1	3	0.00214133	1401	3	asparaginyl-tRNA synthetase	required
STMMW_10121	STMMW_10121	1089020	1089481	-1	182	0.142857	462	66	putative transcriptional regulator	not required
STMMW_10131	dpaL	1089798	1091012	1	742	0.195062	1215	237	diaminopropionate ammonia-lyase (ec 4.3.1.15) (diaminopropionatase) (alpha,beta-diaminopropionate ammonia-lyase)	not required
STMMW_10141	STMMW_10141	1091257	1092693	1	325	0.10508	1437	151	putative putative ion:amino acid symporter	not required
STMMW_10151	pncB	1092771	1093973	-1	244	0.0980881	1203	118	nicotinate phosphoribosyltransferase (ec 2.4.2.11) (naprtase)	not required
STMMW_10161	STMMW_10161	1094168	1095460	-1	526	0.134571	1293	174	integrase	not required
STMMW_10171	STMMW_10171	1095505	1095753	-1	87	0.136546	249	34	excisionase	not required
STMMW_10181	STMMW_10181	1095794	1096033	-1	155	0.270833	240	65	predicted prophage protein	not required
STMMW_10182	STMMW_10182	1096076	1097185	-1	1335	0.357658	1110	397	predicted prophage protein	not required
STMMW_10191	recEa	1097196	1100081	-1	2354	0.280665	2886	810	exodeoxyribonuclease	not required
STMMW_10201	STMMW_10201	1100208	1100507	-1	261	0.233333	300	70	predicted prophage protein	not required
STMMW_10211	STMMW_10211	1100529	1100687	-1	96	0.339623	159	54	predicted prophage protein	not required
STMMW_10221	STMMW_10221	1100680	1100940	-1	128	0.241379	261	63	predicted prophage protein	not required
STMMW_10231	STMMW_10231	1100990	1101400	-1	55	0.00973236	411	4	probable regulatory protein	required
STMMW_10241	C1	1101725	1102099	1	98	0.104	375	39	probable regulatory protein	not required
STMMW_10251	STMMW_10251	1102184	1103106	1	678	0.247021	923	228	predicted prophage protein replication Protein O	not required
STMMW_10261	STMMW_10261	1103109	1103858	1	282	0.150667	750	113	ATPase involved in DNA replication initiation	not required
STMMW_10271	STMMW_10271	1103869	1104216	1	81	0.100575	348	35	predicted prophage protein	not required
STMMW_10281	STMMW_10281	1104213	1104524	1	231	0.211538	312	66	predicted prophage protein	not required
STMMW_10291	STMMW_10291	1104602	1104892	1	164	0.171821	291	50	predicted prophage protein	not required
STMMW_10301	STMMW_10301	1105184	1105417	1	253	0.34188	234	80	predicted prophage protein	not required
STMMW_10311	STMMW_10311	1105833	1106435	1	484	0.288557	603	174	predicted prophage protein	not required
STMMW_10321	ninG	1106644	1107255	1	385	0.187908	612	115	predicted prophage protein	not required
STMMW_10331	STMMW_10331	1107252	1107398	1	85	0.210884	147	31	predicted prophage protein	not required
STMMW_10341	STMMW_10341	1107388	1108185	1	879	0.293233	798	234	putative antitermination protein	not required
STMMW_10351	STMMW_10351	1108252	1108568	1	220	0.255521	317	81	conserved prophage Protein (pseudogene)	not required
STMMW_10361	STMMW_10361	1108742	1108867	1	93	0.285714	126	36	predicted prophage protein	not required
STMMW_10371	STMMW_10371	1109003	1109452	-1	447	0.262222	450	118	predicted prophage protein	not required
STMMW_10381	gtgA	1109813	1110499	-1	1170	0.473071	687	325	predicted prophage protein	not required
STMMW_10392	STMMW_10392	1110769	1111104	1	460	0.494048	336	166	putative holin	not required
STMMW_10391	nucD	1111088	1111540	1	290	0.236203	453	107	lysozyme	not required
STMMW_10401	STMMW_10401	1111537	1112037	1	351	0.245509	501	123	predicted prophage protein	not required
STMMW_10411	STMMW_10411	1112245	1112778	1	232	0.177903	534	95	predicted prophage protein	not required
STMMW_10421	STMMW_10421	1112738	1114873	1	1379	0.213951	2136	457	phage terminase large subunit	not required
STMMW_10422	STMMW_10422	1114870	1115076	1	132	0.2657	207	55	predicted prophage protein	not required
STMMW_10431	STMMW_10431	1115073	1116620	1	1176	0.246124	1548	381	predicted prophage portal protein	not required
STMMW_10441	STMMW_10441	1116571	1118625	1	1677	0.255961	2055	526	Clp-like protease	not required
STMMW_10451	STMMW_10451	1118716	1119039	1	208	0.212963	324	69	putative RecA/RadA recombinase	not required
STMMW_10461	STMMW_10461	1119032	1119331	1	271	0.29	300	87	ATP-binding sugar transporter-like protein	not required
STMMW_10471	STMMW_10471	1119312	1119878	1	376	0.243386	567	138	probable minor tail protein	not required
STMMW_10481	STMMW_10481	1119875	1120276	1	922	0.502488	402	202	probable minor tail protein	not required
STMMW_10491	STMMW_10491	1120288	1121037	1	844	0.325333	750	244	probable major tail protein	not required
STMMW_10501	STMMW_10501	1121083	1121481	1	384	0.295739	399	118	probable minor tail protein	not required
STMMW_10511	STMMW_10511	1121544	1121807	1	236	0.268939	264	71	probable minor tail protein	not required
STMMW_10521	STMMW_10521	1121887	1124874	1	3182	0.320281	2988	957	probable tape measure protein	not required
STMMW_10531	STMMW_10531	1124871	1125203	1	255	0.279279	333	93	probable minor tail protein	not required
STMMW_10541	STMMW_10541	1125302	1125799	1	516	0.341365	498	170	attachment and invasion protein	not required
STMMW_10551	sodCa	1125916	1126449	-1	416	0.294007	534	157	superoxide dismutase precursor (Cu-Zn)	not required
STMMW_10561	STMMW_10561	1126539	1127234	1	442	0.202586	696	141	probable minor tail protein	not required
STMMW_10571	STMMW_10571	1127244	1127981	1	985	0.360434	738	266	probable tail assembly protein	not required
STMMW_10581	STMMW_10581	1128041	1128583	1	525	0.298343	543	162	probable tail assembly protein	not required
STMMW_10591	STMMW_10591	1128655	1132005	1	3288	0.288272	3351	966	host specificity protein	not required
STMMW_10601	STMMW_10601	1132340	1134778	1	2183	0.248052	2439	605	probable tail fiber protein	not required
STMMW_10611	STMMW_10611	1134778	1135359	1	659	0.345361	582	201	putative tail fibre assembly protein	not required
STMMW_10621	STMMW_10621	1135363	1135578	-1	167	0.273148	216	59		not required
STMMW_10631	sseI	1135835	1137631	1	2546	0.376183	1797	676	putative type III secreted protein (pseudogene)	not required
STMMW_10641	STMMW_10641	1136757	1137473	-1	1622	0.594142	717	426	IS26 transposase	not required
STMMW_10651	STMMW_10651	1137729	1138147	1	345	0.28401	419	119	transposase (remnant)	not required
STMMW_10661	STMMW_10661	1138279	1138905	-1	645	0.242424	627	152	predicted prophage protein	not required
STMMW_10671	STMMW_10671	1138974	1139261	-1	70	0.107639	288	31	predicted prophage protein	not required
STMMW_10681	gtgE	1139258	1139944	-1	104	0.0902475	687	62	predicted prophage protein	not required
STMMW_10691	gtgF	1140215	1140406	-1	114	0.296875	192	57	Homolog of msgA	not required
STMMW_10701	pepN	1140833	1143445	1	1450	0.197091	2613	515	aminopeptidase N	not required
STMMW_10711	pyrD	1143653	1144663	1	258	0.0979228	1011	99	dihydroorotate dehydrogenase	not required
STMMW_10721	ycbW	1144829	1145371	1	380	0.285451	543	155	conserved hypothetical protein	not required
STMMW_10731	STMMW_10731	1145368	1146477	-1	293	0.0936937	1110	104	conserved hypothetical protein	not required
STMMW_10741	rlmL	1146576	1148684	1	1094	0.172119	2109	363	conserved hypothetical protein	not required
STMMW_10751	uup	1148697	1150604	1	631	0.117925	1908	225	ABC transporter ATP-binding protein	not required
STMMW_10761	pqiA	1150619	1151872	1	571	0.151515	1254	190	putative inner membrane protein	not required
STMMW_10771	pqiB	1151877	1153517	1	607	0.134065	1641	220	putative secreted protein	not required
STMMW_10781	ymbA	1153514	1154077	1	303	0.182624	564	103	putative lipoprotein	not required
STMMW_10791	rmf	1154333	1154500	1	84	0.0833333	168	14	ribosome modulation factor (protein E)	not required
STMMW_10801	fabA	1154600	1155118	-1	5	0.00578035	519	3	D-3-hydroxydecanoyl-(acyl carrier-protein)	required
STMMW_10811	lonH	1155187	1156773	-1	1183	0.240706	1587	382	conserved hypothetical protein	not required
STMMW_10821	ycbG	1157133	1157585	1	107	0.0971302	453	44	conserved hypothetical protein	not required
STMMW_10831	ompA	1157657	1158709	-1	152	0.0655271	1053	69	outer membrane protein A	ambiguous
STMMW_10841	sulA	1159066	1159575	-1	183	0.141176	510	72	cell division inhibitor	not required
STMMW_10851	sxy	1159792	1160397	1	294	0.173267	606	105	conserved hypothetical protein	not required
STMMW_10861	yccS	1160384	1162537	-1	1261	0.202414	2154	436	putative membrane protein	not required
STMMW_10871	yccF	1162556	1163002	-1	199	0.183445	447	82	putative membrane protein	not required
STMMW_10881	helD	1163126	1165180	1	922	0.156691	2055	322	helicase IV (75 kD helicase)	not required
STMMW_10891	mgsA	1165216	1165674	-1	264	0.169935	459	78	methylglyoxal synthase	not required
STMMW_10901	yccT	1165769	1166431	-1	166	0.12368	663	82	putative secreted protein	not required
STMMW_10911	STMMW_10911	1166602	1167018	1	213	0.151079	417	63	conserved hypothetical protein	not required
STMMW_10921	yccV	1167063	1167380	-1	342	0.27673	318	88	conserved hypothetical protein	not required
STMMW_10931	yccW	1167438	1168649	-1	531	0.174917	1212	212	conserved hypothetical protein	not required
STMMW_10941	STMMW_10941	1168864	1169412	1	292	0.187614	549	103	putative exported protein	not required
STMMW_10951	STMMW_10951	1169438	1170217	1	456	0.197436	780	154	putative transcriptional regulator	not required
STMMW_10961	yccX	1170266	1170547	1	54	0.0815603	282	23	putative acylphosphatase	not required
STMMW_10971	yccK	1170544	1170873	-1	3	0.00909091	330	3	hypothetical protein in helD-serT intergenic region	required
STMMW_10981	yccA	1170960	1171538	-1	263	0.17962	579	104	putative membrane protein	not required
STMMW_10991	pipA	1172240	1172920	-1	611	0.236417	681	161	conserved hypothetical protein	not required
STMMW_11001	pipB	1173141	1174016	-1	19	0.0125571	876	11	conserved hypothetical protein	required
STMMW_11011	STMMW_11011	1174234	1174554	1	0	0	321	0	conserved hypothetical inner membrane protein	required
STMMW_11021	pipC	1174564	1174905	-1	223	0.30117	342	103	cell invasion protein	not required
STMMW_11031	sopB	1174922	1176607	-1	1578	0.350534	1686	591	cell invasion protein	not required
STMMW_11041	pipD	1176790	1178076	-1	1712	0.411033	1287	529	(pseudogene)	not required
STMMW_11051	copS	1178249	1179613	-1	1394	0.335531	1365	458	histidine kinase	not required
STMMW_11061	copR	1179606	1180352	-1	531	0.231593	747	173	response regulator	not required
STMMW_11071	STMMW_11071	1180422	1180832	1	226	0.238443	411	98	putative exported protein	not required
STMMW_11081	hpaC	1181165	1181677	-1	212	0.183236	513	94	4-hydroxyphenylacetate 3-monooxygenase coupling protein	not required
STMMW_11091	hpaB	1181695	1183257	-1	623	0.173385	1563	271	4-hydroxyphenylacetate 3-monooxygenase	not required
STMMW_11101	hpaR	1183475	1183915	-1	176	0.15873	441	70	homoprotocatechuate degradative operon repressor	not required
STMMW_11111	hpaG	1184190	1185479	1	662	0.171318	1290	221	4-hydroxyphenylacetate degradation bifunctional isomerase/decarboxylase [includes: 2-hydroxyhepta-2,4- diene-1,7-dioate isomerase	not required
STMMW_11121	hpaE	1185476	1186942	1	930	0.194956	1467	286	5-carboxymethyl-2-hydroxymuconate semialdehyde dehydrogenase (ec 1.2.1.-) (chms dehydrogenase)	not required
STMMW_11131	hpaD	1186944	1187795	1	618	0.25939	852	221	3,4-dihydroxyphenylacetate 2,3-dioxygenase	not required
STMMW_11141	hpaF	1187805	1188185	1	237	0.254593	381	97	5-carboxymethyl-2-hydroxymuconate delta- isomerase	not required
STMMW_11151	hpaH	1188328	1189131	1	718	0.262438	804	211	2-oxo-hepta-3-ene-1,7-dioic acid hydratase	not required
STMMW_11161	hpaI	1189142	1189933	1	659	0.260101	792	206	2,4-dihydroxyhept-2-ene-1,7-dioic acid aldolase	not required
STMMW_11171	hpaX	1190005	1191381	1	913	0.221496	1377	305	putative 4-hydroxyphenylacetate permease	not required
STMMW_11181	hpaA	1191391	1192287	1	341	0.148272	897	133	4-hydroxyphenylacetate 3-monooxygenase operon regulatory protein	not required
STMMW_11191	STMMW_11191	1192322	1193239	1	441	0.17756	918	163	hypothetical protein	not required
STMMW_11201	STMMW_11201	1193647	1194009	-1	157	0.239669	363	87	conserved hypothetical protein	not required
STMMW_11211	yccD	1194663	1194968	-1	231	0.264706	306	81	conserved hypothetical protein	not required
STMMW_11221	cbpA	1194968	1195888	-1	415	0.190011	921	175	curved DNA-binding protein	not required
STMMW_11231	STMMW_11231	1196008	1196202	-1	140	0.153846	195	30	conserved hypothetical protein	not required
STMMW_11240	scsA	1196123	1196485	1	236	0.184573	363	67	suppression of copper sensitivity: putative copper binding protein	not required
STMMW_11241	scsB	1196534	1198420	1	982	0.17912	1887	338	membrane protein, suppressor for copper- sensitivity B precursor	not required
STMMW_11251	scsC	1198417	1199040	1	176	0.0929487	624	58	secreted protein, suppressor for copper- sensitivity C precursor	not required
STMMW_11261	scsD	1199030	1199536	1	278	0.18146	507	92	secreted protein, suppressor for copper- sensitivity D	not required
STMMW_11271	agp	1199669	1200910	1	824	0.194847	1242	242	glucose-1-phosphatase precursor (G1Pase), secreted	not required
STMMW_11281	yccJ	1200944	1201171	-1	88	0.162281	228	37	conserved hypothetical protein	not required
STMMW_11291	wrbA	1201192	1201788	-1	346	0.221106	597	132	trp repressor binding protein	not required
STMMW_11301	ymdF	1202173	1202340	1	48	0.136905	168	23	conserved hypothetical protein	not required
STMMW_11311	ycdC	1202477	1203115	1	151	0.114241	639	73	putative transcriptional regulator	not required
STMMW_11321	STMMW_11321	1203112	1203507	-1	193	0.15404	396	61	putative secreted protein	not required
STMMW_11331	putA	1203566	1207528	-1	1532	0.131971	3963	523	proline dehydrogenase (proline oxidase)	not required
STMMW_11341	putP	1207950	1209458	1	513	0.14049	1509	212	sodium/proline symporter (proline permease)	not required
STMMW_11351	phoH	1210285	1211139	1	591	0.174269	855	149	PhoH protein (phosphate starvation-inducible protein PsiH)	not required
STMMW_11361	STMMW_11361	1211245	1212126	-1	166	0.0873016	882	77	putative transcriptional regulator	not required
STMMW_11371	STMMW_11371	1212411	1213907	-1	712	0.152305	1497	228	putative sodium/glucose cotransporter	not required
STMMW_11381	STMMW_11381	1214244	1214924	-1	1305	0.521292	681	355	conserved hypothetical protein	not required
STMMW_11391	STMMW_11391	1215430	1216590	1	259	0.0551249	1161	64	putative exported protein	ambiguous
STMMW_11401	STMMW_11401	1216636	1217328	1	3	0.004329	693	3	putative secreted protein	required
STMMW_11411	STMMW_11411	1217611	1218891	1	751	0.236534	1281	303	putative transporter	not required
STMMW_11421	STMMW_11421	1218902	1220008	1	695	0.230352	1107	255	putative oxidoreductase	not required
STMMW_11431	ycdW	1220852	1221790	1	343	0.14803	939	139	putative 2-hydroxyacid dehydrogenase in phoh- csgg intergenic region	not required
STMMW_11441	ycdX	1221875	1222612	1	348	0.144986	738	107	conserved hypothetical protein	not required
STMMW_11451	ycdY	1222636	1223190	1	253	0.138739	555	77	conserved hypothetical protein	not required
STMMW_11461	ycdZ	1223300	1223785	1	605	0.162551	486	79	putative membrane protein	not required
STMMW_11471	csgG	1223824	1224570	-1	603	0.243641	747	182	assembly/transport component in curli production	not required
STMMW_11481	csgF	1224684	1225100	-1	113	0.0959233	417	40	assembly/transport component in curli production	not required
STMMW_11491	csgE	1225127	1225522	-1	148	0.179293	396	71	assembly/transport component in curli production	not required
STMMW_11501	csgD	1225527	1226177	-1	114	0.0322581	651	21	csg operon transcriptional regulator protein	required
STMMW_11511	csgB	1226932	1227387	1	97	0.107456	456	49	nucleation component of curlin monomers	not required
STMMW_11521	csgA	1227429	1227884	1	1004	0.58114	456	265	major curlin subunit precursor	not required
STMMW_11531	csgC	1227946	1228272	1	314	0.327217	327	107	curli prooduction protein	not required
STMMW_11541	ymdA	1228403	1228723	1	184	0.242991	321	78	putative exported protein	not required
STMMW_11551	STMMW_11551	1228814	1229353	1	253	0.183333	540	99	conserved hypothetical protein	not required
STMMW_11561	ymdC	1229292	1230776	1	794	0.167677	1485	249	conserved hypothetical protein	not required
STMMW_11571	mdoC	1230793	1231947	-1	1315	0.41039	1155	474	Glucans biosynthesis protein C	not required
STMMW_11581	mdoG	1232219	1233754	1	2559	0.382812	1536	588	periplasmic glucans biosynthesis protein MdoG precursor	not required
STMMW_11591	mdoH	1233747	1236290	1	5577	0.387579	2544	986	periplasmic glucans biosynthesis protein	not required
STMMW_11601	yceK	1236364	1236591	1	182	0.236842	228	54	putative lipoprotein	not required
STMMW_11611	msyB	1236592	1236966	-1	283	0.290667	375	109	acidic protein MsyB	not required
STMMW_11621	yceE	1237048	1238262	-1	397	0.140741	1215	171	putative membrane transport protein	not required
STMMW_11631	htrB	1238417	1239337	-1	1	0.00108578	921	1	lipid A biosynthesis lauroyl acyltransferase (EC 2.3.1.-) (heat shock protein)	required
STMMW_11641	yceA	1239557	1240609	1	497	0.209877	1053	221	conserved hypothetical protein	not required
STMMW_11651	yceI	1240661	1241236	-1	257	0.173611	576	100	putative exported protein	not required
STMMW_11661	yceJ	1241233	1241805	-1	712	0.307155	573	176	cytochrome b561 homolog 2	not required
STMMW_11671	yceO	1242068	1242181	-1	13	0.0701754	114	8	hypothetical protein	ambiguous
STMMW_11681	solA	1242222	1243340	-1	1066	0.337802	1119	378	MTOX	not required
STMMW_11691	bssS	1243453	1243707	-1	480	0.541176	255	138	conserved hypothetical protein	not required
STMMW_11701	dinI	1243997	1244242	-1	103	0.235772	246	58	damage-inducible protein	not required
STMMW_11711	pyrC	1244316	1245362	-1	182	0.078319	1047	82	DHOase	not required
STMMW_11721	yceB	1245467	1246027	-1	174	0.14795	561	83	putative exported protein	not required
STMMW_11731	grxB	1246152	1246799	-1	213	0.154321	648	100	glutaredoxin 2	not required
STMMW_11741	yceL	1246863	1248071	-1	711	0.200993	1209	243	putative membrane transporter	not required
STMMW_11751	rimJ	1248308	1248892	1	375	0.22735	585	133	ribosomal-protein-alanine acetyltransferase	not required
STMMW_11761	yceH	1248928	1249575	1	321	0.16821	648	109	conserved hypothetical protein	not required
STMMW_11771	mviM	1249577	1250500	1	628	0.204545	924	189	putative virulence factor MviM	not required
STMMW_11781	mviN	1250765	1252339	1	22	0.0107937	1575	17	virulence factor MviN	required
STMMW_11791	flgN	1252421	1252843	-1	319	0.262411	423	111	flagella synthesis protein FlgN	not required
STMMW_11801	flgM	1252848	1253141	-1	43	0.0884354	294	26	negative regulator of flagellin synthesis (anti- sigma factor)	not required
STMMW_11811	flgA	1253233	1253892	-1	1818	0.474242	660	313	flagellar basal body P-ring protein FlgA precursor	not required
STMMW_11821	flgB	1254049	1254465	1	1353	0.477218	417	199	putative flagellar basal-body rod protein FlgB (proximal rod protein)	not required
STMMW_11831	flgC	1254469	1254873	1	1621	0.580247	405	235	putative flagellar basal-body rod protein FlgC (proximal rod protein)	not required
STMMW_11841	flgD	1254885	1255583	1	2585	0.497854	699	348	flagellar hook formation protein FlgD	not required
STMMW_11851	flgE	1255610	1256821	1	4239	0.538779	1212	653	flagellar hook protein FlgE	not required
STMMW_11861	flgF	1256842	1257597	1	3465	0.611111	756	462	putative flagellar basal-body rod protein FlgF (proximal rod protein)	not required
STMMW_11871	flgG	1257611	1258393	1	2879	0.521073	783	408	flagellar basal-body rod protein FlgG (distal rod protein)	not required
STMMW_11881	flgH	1258448	1259146	1	1983	0.48784	699	341	Basal body L-ring protein	not required
STMMW_11891	flgI	1259158	1260255	1	6710	0.685792	1098	753	Basal body P-ring protein	not required
STMMW_11901	flgJ	1260255	1261205	1	3081	0.533123	951	507	flagellar protein FlgJ	not required
STMMW_11911	flgK	1261270	1262931	1	2009	0.287605	1662	478	flagellar hook-associated protein 1	not required
STMMW_11921	flgL	1262946	1263899	1	842	0.22327	954	213	flagellar hook-associated protein 3	not required
STMMW_11931	rne	1264156	1267359	-1	62	0.0118602	3204	38	ribonuclease E	required
STMMW_11941	STMMW_11941	1267495	1267743	1	1	0.00401606	249	1	conserved hypothetical protein	required
STMMW_11951	rluC	1267933	1268892	1	189	0.0802083	960	77	ribosomal large subunit pseudouridine synthase C (EC 4.2.1.70)	not required
STMMW_11961	STMMW_11961	1269048	1269791	1	611	0.271505	744	202	putative inner membrane lipoprotein	not required
STMMW_11971	STMMW_11971	1269997	1270221	1	167	0.262222	225	59	conserved hypothetical protein	not required
STMMW_11981	mafa	1270293	1270877	-1	328	0.215385	585	126	conserved hypothetical protein	not required
STMMW_11991	yceD	1271075	1271596	1	50	0.0402299	522	21	conserved hypothetical protein	required
STMMW_12001	rpl32	1271648	1271821	1	21	0.045977	174	8	50S ribosomal protein L32	required
STMMW_12011	plsX	1271955	1273034	1	588	0.19537	1080	211	Fatty acid/phospholipid synthesis protein plsX	not required
STMMW_12021	fabH	1273114	1274067	1	6	0.00524109	954	5	3-oxoacyl-[acyl-carrier-protein] synthase III	required
STMMW_12031	fabD	1274083	1275012	1	5	0.00430108	930	4	malonyl CoA-acyl carrier protein transacylase	required
STMMW_12041	fabG	1275025	1275759	1	1	0.00136054	735	1	3-oxoacyl-[acyl-carrier protein] reductase	required
STMMW_12051	acpP	1275915	1276151	1	0	0	237	0	ACP	required
STMMW_12061	fabF	1276273	1277478	1	107	0.0555556	1206	67	3-oxoacyl-[acyl-carrier-protein] synthase II	ambiguous
STMMW_12071	pabC	1277602	1278411	1	343	0.151852	810	123	4-amino-4-deoxychorismate lyase	not required
STMMW_12081	yceG	1278480	1279436	1	415	0.15256	957	146	putative secreted protein	not required
STMMW_12091	tmk	1279426	1280067	1	4	0.00623053	642	4	dTMP kinase	required
STMMW_12101	holB	1280064	1281068	1	27	0.0109453	1005	11	DNA polymerase III, delta' subunit	required
STMMW_12111	ycfH	1281079	1281876	1	376	0.182957	798	146	conserved hypothetical protein	not required
STMMW_12121	ptsG	1282171	1283604	1	479	0.127615	1434	183	PTS system, glucose-specific IIBC component	not required
STMMW_12131	fhuE	1283689	1285863	-1	1242	0.202299	2175	440	outer-membrane receptor for Fe(iii)-coprogen, fe(iii)-ferrioxamine b and fe(iii)-rhodotrulic acid	not required
STMMW_12141	ycfF	1286205	1286564	1	193	0.186111	360	67	putative protein kinase C inhibitor	not required
STMMW_12151	ycfL	1286567	1286941	1	188	0.189333	375	71	putative lipoprotein	not required
STMMW_12161	ycfM	1286955	1287593	1	479	0.231612	639	148	putative lipoprotein	not required
STMMW_12171	thiK	1287574	1288398	1	529	0.246061	825	203	conserved hypothetical protein	not required
STMMW_12181	nagZ	1288409	1289434	1	551	0.188109	1026	193	Beta-N-acetylhexosaminidase	not required
STMMW_12191	ycfP	1289459	1290001	1	201	0.11418	543	62	conserved hypothetical protein	not required
STMMW_12201	ndh	1290256	1291560	1	101	0.0467433	1305	61	NADH dehydrogenase	required
STMMW_12211	ycfJ	1291739	1292278	1	190	0.153704	540	83	putative secreted protein	not required
STMMW_12221	ycfQ	1292353	1292988	-1	268	0.171384	636	109	Putative TetR-family regulatory protein	not required
STMMW_12231	ycfR	1293230	1293487	1	34	0.0775194	258	20	putative secreted protein	not required
STMMW_12241	ycfS	1293584	1294549	-1	381	0.162526	966	157	putative exported protein	not required
STMMW_12251	mfd	1294697	1298143	-1	2046	0.179576	3447	619	transcription-repair coupling factor (TrcF)	not required
STMMW_12261	ycfU	1298370	1299680	1	24	0.0122044	1311	16	ABC transporter integral membrane subunit	required
STMMW_12271	lolD	1299673	1300374	1	5	0.0042735	702	3	ABC transporter ATP-binding subunit	required
STMMW_12281	ycfW	1300374	1301618	1	1	0.000803213	1245	1	ABC transporter integral membrane subunit	required
STMMW_12291	ycfX	1301647	1302558	1	224	0.0997807	912	91	putative ROK-family protein	not required
STMMW_12301	cobB	1302577	1303398	1	114	0.0656934	822	54	putative regulatory protein	ambiguous
STMMW_12311	potD	1303480	1304526	-1	132	0.0620821	1047	65	spermidine/putrescine-binding periplasmic protein precursor	ambiguous
STMMW_12321	potC	1304551	1305330	-1	163	0.0961538	780	75	spermidine/putrescine transport system permease protein PotC	not required
STMMW_12331	sifA	1305646	1306656	-1	126	0.0484669	1011	49	putative virulence determinant	ambiguous
STMMW_12341	potB	1306985	1307848	-1	568	0.274306	864	237	spermidine/putrescine transport system permease protein PotB	not required
STMMW_12351	potA	1307832	1308968	-1	255	0.102902	1137	117	spermidine/putrescine transport ATP-binding protein PotA (ABC superfamily)	not required
STMMW_12361	pepT	1309219	1310448	1	542	0.162602	1230	200	aminotripeptidase	not required
STMMW_12371	STMMW_12371	1310452	1312497	1	3681	0.410068	2046	839	conserved hypothetical protein (pseudogene)	not required
STMMW_12381	STMMW_12381	1310659	1311117	1	2216	0.832244	459	382	putative transposase	not required
STMMW_12391	ycfD	1312537	1313658	-1	344	0.124777	1122	140	conserved hypothetical protein	not required
STMMW_12401	phoQ	1313739	1315202	-1	819	0.171448	1464	251	sensor protein PhoQ, regulator of virulence determinants	not required
STMMW_12411	phoP	1315202	1315876	-1	317	0.139259	675	94	transcriptional regulatory protein PhoP, regulator of virulence determinants	not required
STMMW_12421	purB	1316000	1317370	-1	0	0	1371	0	adenylosuccinate lyase	required
STMMW_12431	ycfC	1317374	1318021	-1	16	0.0169753	648	11	conserved hypothetical protein	required
STMMW_12441	mnmA	1318102	1319208	-1	11	0.00451671	1107	5	5-methylaminomethyl-2-thiouridylate-methyltrans ferase EC 2.1.1.61	required
STMMW_12451	ymfB	1319262	1319723	-1	96	0.0800866	462	37	putative MutT family protein	not required
STMMW_12461	STMMW_12461	1319735	1320064	-1	55	0.069697	330	23	putative secreted protein	ambiguous
STMMW_12471	rluB	1320061	1320726	-1	186	0.0945946	666	63	putative ribosomal large subunit pseudouridine synthase B	not required
STMMW_12481	icdA	1320898	1322148	1	1	0.000799361	1251	1	isocitrate dehydrogenase	required
STMMW_12491	STMMW_12491	1322596	1323720	1	37	0.0168889	1125	19	putative bacteriophage protein	required
STMMW_12501	envF	1324702	1325490	-1	9	0.0101394	789	8	lipoprotein	required
STMMW_12511	msgA	1325979	1326218	-1	145	0.245833	240	59	putative virulence protein (MsgA)	not required
STMMW_12521	envE	1326409	1326930	-1	342	0.187739	522	98	putative lipoprotein	not required
STMMW_12531	cspH	1327345	1327557	-1	146	0.338028	213	72	cold shock protein (CspH)	not required
STMMW_12541	pagD	1327689	1327952	-1	5	0.0113636	264	3	putative outer membrane virulence protein (PagD)	required
STMMW_12551	pagC	1328851	1329321	1	110	0.140127	471	66	outer membrane invasion protein (PagC)	not required
STMMW_12561	pliC	1330558	1330902	-1	282	0.35942	345	124	putative secreted protein	not required
STMMW_12562	STMMW_12562	1331280	1331405	1	47	0.174603	126	22	putative lipoprotein	not required
STMMW_12571	STMMW_12571	1331605	1331877	1	68	0.161172	273	44	hypothetical protein	not required
STMMW_12581	STMMW_12581	1332029	1332496	1	199	0.160256	468	75	putative heat shock protein	not required
STMMW_12591	STMMW_12591	1332835	1333878	1	664	0.181034	1044	189	hypothetical protein	not required
STMMW_12601	STMMW_12601	1333961	1334491	-1	258	0.19774	531	105	putative cytochrome	not required
STMMW_12611	STMMW_12611	1334640	1334954	-1	220	0.263492	315	83	putative lipoprotein	not required
STMMW_12621	STMMW_12621	1335636	1337270	1	422	0.120489	1635	197	putative substrate-binding transport protein	not required
STMMW_12631	STMMW_12631	1337270	1338244	1	349	0.134359	975	131	putative inner membrane transport protein	not required
STMMW_12641	STMMW_12641	1338234	1339046	1	410	0.150062	813	122	putative inner membrane transport protein	not required
STMMW_12651	STMMW_12651	1339040	1339837	1	284	0.126566	798	101	putative ABC transport ATP-binding protein	not required
STMMW_12661	STMMW_12661	1339831	1340421	1	247	0.155668	591	92	putative ABC transport ATP-binding subunit	not required
STMMW_12671	STMMW_12671	1340503	1341636	-1	455	0.17284	1134	196	putative membrane protein	not required
STMMW_12681	STMMW_12681	1341830	1342156	1	99	0.12844	327	42	conserved hypothetical protein	not required
STMMW_12691	STMMW_12691	1342353	1343000	1	295	0.146605	648	95	putative exported protein	not required
STMMW_12701	aadA	1343109	1343897	1	360	0.159696	789	126	aminoglycoside-resistance protein	not required
STMMW_12711	STMMW_12711	1344042	1344635	1	61	0.0538721	594	32	putative regulatory protein	ambiguous
STMMW_12721	STMMW_12721	1344704	1345552	1	418	0.202591	849	172	putative transcriptional regulator	not required
STMMW_12731	STMMW_12731	1345807	1346055	-1	78	0.220884	249	55	hypothetical protein	not required
STMMW_12741	STMMW_12741	1346134	1346283	-1	5	0.0266667	150	4	hypothetical protein	required
STMMW_12751	aroQ	1346366	1346911	1	253	0.168498	546	92	putative chorismate mutase	not required
STMMW_12761	yeaS	1347108	1347746	1	186	0.0954617	639	61	putative membrane transport protein	not required
STMMW_12771	yeaR	1347919	1348281	1	74	0.0936639	363	34	conserved hypothetical protein	not required
STMMW_12781	yoaG	1348284	1348466	1	61	0.10929	183	20	conserved hypothetical protein	not required
STMMW_12791	STMMW_12791	1348696	1349337	1	182	0.123053	642	79	putative membrane protein	not required
STMMW_12801	STMMW_12801	1349459	1349644	1	23	0.102151	186	19	conserved hypothetical protein	not required
STMMW_12811	yeaQ	1349652	1349900	1	22	0.0481928	249	12	putative inner membrane protein	ambiguous
STMMW_12821	yaoF	1350333	1350584	1	68	0.0873016	252	22	conserved hypothetical protein	not required
STMMW_12831	STMMW_12831	1350653	1350964	1	32	0.0448718	312	14	hypothetical protein	required
STMMW_12841	yeaO	1350950	1351297	-1	23	0.0258621	348	9	putative bacteriophage protein	required
STMMW_12851	yeaN	1351416	1352600	-1	243	0.0869198	1185	103	putative membrane protein	not required
STMMW_12861	yeaM	1352701	1353495	1	216	0.116981	795	93	putative transcriptional regulator	not required
STMMW_12862	yeaL	1353475	1353921	-1	46	0.0536913	447	24	putative membrane protein	ambiguous
STMMW_12881	yeaK	1354231	1354749	-1	298	0.119461	519	62	conserved hypothetical protein	not required
STMMW_12891	yeaJ	1354799	1356292	-1	1017	0.216198	1494	323	conserved hypothetical membrane protein	not required
STMMW_12901	yeaH	1356933	1358219	-1	638	0.181041	1287	233	conserved hypothetical protein	not required
STMMW_12911	yeaG	1358342	1360276	-1	848	0.144186	1935	279	conserved hypothetical protein	not required
STMMW_12921	mipA	1360703	1361449	1	241	0.121821	747	91	putative outer membrane protein	not required
STMMW_12931	STMMW_12931	1361739	1362935	1	311	0.0994152	1197	119	putative regulatory protein	not required
STMMW_12941	STMMW_12941	1363032	1363889	1	328	0.134033	858	115	putative oxidoreductase	not required
STMMW_12951	yeaD	1363988	1364872	-1	241	0.105085	885	93	conserved hypothetical protein	not required
STMMW_12961	STMMW_12961	1364872	1365126	-1	32	0.0627451	255	16	conserved hypothetical protein	ambiguous
STMMW_12971	gapA	1365207	1366202	-1	225	0.00401606	996	4	glyceraldehyde 3-phosphate dehydrogenase a	required
STMMW_12981	yeaA	1366514	1366957	1	125	0.0810811	444	36	conserved hypothetical protein	not required
STMMW_12991	yeaC	1366999	1367277	1	69	0.0322581	279	9	conserved hypothetical protein	required
STMMW_13001	nam	1367629	1368285	-1	277	0.150685	657	99	pyrazinamidase/nicotinamidase	not required
STMMW_13011	ansA	1368312	1369328	-1	132	0.0589971	1017	60	L-asparaginase I	ambiguous
STMMW_13021	sppA	1369424	1371280	-1	547	0.128702	1857	239	protease IV	not required
STMMW_13031	ydjA	1371454	1372005	1	82	0.0652174	552	36	putative nitroreductase	ambiguous
STMMW_13041	selD	1372123	1373166	1	407	0.110153	1044	115	Selenium donor protein	not required
STMMW_13051	topB	1373171	1375120	1	475	0.0851282	1950	166	DNA topoisomerase iii	not required
STMMW_13061	gdhA	1375150	1376493	-1	385	0.101935	1344	137	NADP-specific glutamate dehydrogenase	not required
STMMW_13071	STMMW_13071	1376732	1377007	1	68	0.134058	276	37	putative exported protein	not required
STMMW_13081	STMMW_13081	1376967	1377383	-1	120	0.100719	417	42	putative MutT-family protein	not required
STMMW_13091	xthA	1377456	1378262	-1	133	0.0768278	807	62	exodeoxyribonuclease III	not required
STMMW_13101	argDa	1378708	1379934	1	289	0.0782396	1227	96	Acetylornithine/succinyldiaminopimelate aminotransferase	not required
STMMW_13111	astA	1379925	1380959	1	127	0.0618357	1035	64	arginine N-succinyltransferase	ambiguous
STMMW_13121	astD	1380956	1382434	1	239	0.0784314	1479	116	succinylglutamic semialdehyde dehydrogenase	not required
STMMW_13131	astB	1382431	1383774	1	187	0.0431548	1344	58	succinylarginine dihydrolase	required
STMMW_13141	astE	1383767	1384735	1	132	0.0402477	969	39	succinylglutamate desuccinylase	required
STMMW_13151	STMMW_13151	1385071	1385556	1	200	0.191358	486	93	putative exported protein	not required
STMMW_13161	STMMW_13161	1385631	1386539	-1	213	0.116612	909	106	conserved hypothetical protein	not required
STMMW_13171	nadE	1386633	1387460	-1	8	0.00724638	828	6	3-dependent NAD synthetase EC 6.3.1.5. Probable glutamine-dependent NAD synthetase EC 6.3.5.1	required
STMMW_13181	osmE	1387679	1388020	1	80	0.0730994	342	25	osmotically inducible lipoprotein E precursor	not required
STMMW_13191	celA	1388321	1388641	1	131	0.102804	321	33	PTS system, cellobiose-specific IIb component	not required
STMMW_13201	celB	1388724	1390082	1	425	0.153054	1359	208	PTS system, cellobiose-specific IIC component	not required
STMMW_13211	celC	1390133	1390480	1	201	0.140805	348	49	phosphoenolpyruvate dependent phosphotransferase enzyme III-cellobiose	not required
STMMW_13221	celD	1390569	1391333	1	226	0.0614379	765	47	putative cel operon repressor	ambiguous
STMMW_13231	celF	1391458	1392813	1	169	0.0730088	1356	99	phospho-beta-glucosidase B	not required
STMMW_13241	celG	1392826	1393584	1	236	0.0658762	759	50	conserved hypothetical protein	ambiguous
STMMW_13251	katE	1393628	1395880	-1	520	0.0967599	2253	218	catalase HPII	not required
STMMW_13261	cedA	1396245	1396487	1	58	0.148148	243	36	cell division activator CedA	not required
STMMW_13271	ydjN	1396589	1397980	-1	480	0.137213	1392	191	putative sodium:dicarboxylate symporter	not required
STMMW_13281	ydjM	1398117	1398716	-1	142	0.09	600	54	putative membrane protein	not required
STMMW_13291	yniC	1398854	1399522	-1	197	0.0866966	669	58	putative hydrolase	not required
STMMW_13301	yniB	1399671	1400207	1	109	0.0689013	537	37	putative membrane protein	ambiguous
STMMW_13311	STMMW_13311	1400250	1401110	-1	316	0.113821	861	98	conserved hypothetical protein	not required
STMMW_13321	ydiZ	1401217	1401507	-1	40	0.0618557	291	18	conserved hypothetical protein	ambiguous
STMMW_13331	pfkB	1401604	1402536	-1	336	0.122186	933	114	6-phosphofructokinase isozyme	not required
STMMW_13341	ydiY	1402825	1403583	1	358	0.173913	759	132	putative outer membrane protein	not required
STMMW_13351	lpxR	1403632	1404591	-1	287	0.0979167	960	94	putative outer membrane protein	not required
STMMW_13361	STMMW_13361	1404734	1405048	1	15	0.0412698	315	13	putative membrane protein	required
STMMW_13371	STMMW_13371	1405063	1405899	1	476	0.199522	837	167	putative DNA/RNA non-specific endonuclease	not required
STMMW_13381	STMMW_13381	1406072	1406278	1	47	0.15942	207	33	conserved hypothetical protein	not required
STMMW_13391	rfc	1406601	1407824	-1	20	0.0114379	1224	14	O-antigen polymerase	required
STMMW_13401	thrS	1408716	1410644	1	50	0.00518403	1929	10	ThrRS	required
STMMW_13411	infC	1410756	1411190	1	0	0	435	0	Translation initiation factor IF-3. Translation initiation factor IF-3, chloroplast	required
STMMW_13421	rpl35	1411286	1411483	1	0	0	198	0	50S ribosomal protein L35. Chloroplast 50S ribosomal protein L35	required
STMMW_13431	rpl20	1411534	1411890	1	0	0	357	0	50S ribosomal subunit protein L20	required
STMMW_13441	pheS	1412192	1413175	1	3	0.00203252	984	2	PheRS	required
STMMW_13451	pheT	1413191	1415578	1	27	0.00335008	2388	8	PheRS	required
STMMW_13461	himA	1415583	1415882	1	23	0.04	300	12	integration host factor alpha-subunit	required
STMMW_13471	btuC	1416076	1417065	1	141	0.0474747	990	47	Vitamin B12 transport system permease protein btuC	required
STMMW_13481	btuE	1417157	1417708	1	64	0.0362319	552	20	putative glutathione peroxidase/vitamin B12 transport periplasmic protein BtuE	required
STMMW_13491	btuD	1417708	1418457	1	53	0.0346667	750	26	vitamin B12 ABC transport ATP-binding protein	required
STMMW_13501	nlpC	1418534	1418998	1	87	0.0709677	465	33	putative lipoprotein	ambiguous
STMMW_13511	ydiV	1419312	1420025	1	39	0.0378151	714	27	conserved hypothetical protein	required
STMMW_13521	ydiU	1420087	1421529	1	171	0.0519751	1443	75	conserved hypothetical protein	ambiguous
STMMW_13531	ydiE	1421564	1421755	-1	31	0.0729167	192	14	conserved hypothetical protein	not required
STMMW_13541	aroH	1421912	1422958	-1	93	0.0468004	1047	49	3-deoxy-D-arabinoheptulosonate 7-phosphate synthase	required
STMMW_13551	ydiA	1423114	1423947	-1	109	0.0419664	834	35	conserved hypothetical protein	required
STMMW_13561	pps	1424284	1426662	1	765	0.101303	2379	241	phosphoenolpyruvate synthase	not required
STMMW_13571	ydiD	1426704	1428344	-1	512	0.127361	1641	209	putative putative ligase/synthetase	not required
STMMW_13581	ydiT	1428434	1428727	-1	88	0.156463	294	46	ferredoxin-like protein	not required
STMMW_13591	ydiS	1428724	1430010	-1	287	0.0870241	1287	112	putative electron transfer flavoprotein-quinone oxidoreductase	not required
STMMW_13601	ydiR	1430067	1431002	-1	274	0.116453	936	109	putative electron transfer flavoprotein subunit	not required
STMMW_13611	ydiQ	1431024	1431788	-1	103	0.0575163	765	44	putative electron transfer flavoprotein subunit	ambiguous
STMMW_13621	ydiP	1432251	1433141	1	20	0.013468	891	12	putative HTH-type transcriptional regulator	required
STMMW_13631	ydiO	1433217	1434368	-1	328	0.12934	1152	149	putative acyl-CoA dehydrogenase	not required
STMMW_13641	ydiF	1434382	1435935	-1	290	0.0791506	1554	123	putative acetyl CoA transferase	not required
STMMW_13651	aroD	1436131	1436889	-1	45	0.0395257	759	30	3-dehydroquinate dehydratase	required
STMMW_13661	aroE	1436934	1437800	-1	256	0.11534	867	100	shikimate 5-dehydrogenase	not required
STMMW_13671	ydiN	1437867	1439102	-1	213	0.0703883	1236	87	Putative MFS-family transport protein	ambiguous
STMMW_13681	ydiM	1439466	1440677	-1	404	0.160891	1212	195	Putative MFS-family transport protein	not required
STMMW_13691	ydiL	1440818	1441177	-1	39	0.0416667	360	15	conserved hypothetical protein	required
STMMW_13701	ydiK	1441635	1442753	-1	261	0.0813226	1119	91	lipoprotein	not required
STMMW_13711	ydiJ	1443018	1446074	1	383	0.0539745	3057	165	conserved hypothetical FAD-binding protein	ambiguous
STMMW_13721	STMMW_13721	1446071	1446481	1	157	0.0583942	411	24	conserved hypothetical protein	ambiguous
STMMW_13731	ydiH	1446580	1446768	1	23	0.0740741	189	14	conserved hypothetical protein	not required
STMMW_13741	STMMW_13741	1447056	1448402	-1	367	0.0972532	1347	131	putative transporter	not required
STMMW_13751	sufA	1448829	1449197	1	30	0.0433604	369	16	conserved hypothetical protein	required
STMMW_13761	sufB	1449206	1450693	1	265	0.0658602	1488	98	conserved hypothetical protein	ambiguous
STMMW_13771	sufC	1450710	1451456	1	226	0.0910308	747	68	putative ABC transport ATP-binding subunit	not required
STMMW_13781	sufD	1451431	1452702	1	307	0.077044	1272	98	conserved hypothetical protein	not required
STMMW_13791	sufS	1452699	1453919	1	318	0.0687961	1221	84	putative amintransferase	ambiguous
STMMW_13801	ynhA	1453932	1454348	1	53	0.0551559	417	23	conserved hypothetical protein	ambiguous
STMMW_13811	ynhG	1454503	1455504	1	134	0.0648703	1002	65	putative exported protein	ambiguous
STMMW_13821	lppB	1455571	1455810	-1	58	0.0666667	240	16	major outer membrane lipoprotein	ambiguous
STMMW_13822	lpp	1455893	1456129	-1	4	0.00421941	237	1	major outer membrane lipoprotein	required
STMMW_13831	pykF	1456440	1457798	-1	34	0.01766	1359	24	pyruvate kinase	required
STMMW_13841	orf48	1458254	1459597	-1	267	0.078125	1344	105	putative amino acid permease	not required
STMMW_13851	orf32	1459619	1460512	-1	273	0.107383	894	96	putative hydrolase	not required
STMMW_13861	orf245	1460571	1461308	-1	12	0.00813008	738	6	Orf 245 protein	required
STMMW_13871	orf408	1461320	1462546	-1	124	0.0578647	1227	71	putative ribokinase/regulatory protein	ambiguous
STMMW_13881	ttrA	1462869	1465931	-1	356	0.0590924	3063	181	tetrathionate reductase subunit A	ambiguous
STMMW_13891	ttrC	1465924	1466946	-1	223	0.0733138	1023	75	tetrathionate reductase subunit C (membrane protein)	not required
STMMW_13901	ttrB	1466947	1467699	-1	162	0.0849934	753	64	tetrathionate reductase subunit B	not required
STMMW_13911	ttrS	1467863	1469641	1	289	0.0584598	1779	104	putative histidine kinase, two component regulatory protein	ambiguous
STMMW_13921	ttrR	1469616	1470236	1	84	0.0644122	621	40	putative two-component response regulator	ambiguous
STMMW_13931	orf70	1470334	1470546	1	18	0.0469484	213	10	pathogenicity island protein	required
STMMW_13941	orf319	1470642	1471601	-1	123	0.053125	960	51	putative pathogenicity island protein	ambiguous
STMMW_13951	orf242	1471774	1472502	-1	184	0.0809328	729	59	putative transcriptional regulator	not required
STMMW_13961	ssrB	1472681	1473319	-1	206	0.084507	639	54	putative two-component response regulator	not required
STMMW_13971	ssrA	1473350	1476112	-1	147	0.0282302	2763	78	putative two-component sensor kinase	required
STMMW_13981	ssaB	1476513	1476914	1	5	0.00995025	402	4	putative pathogenicity island 2 secreted effector protein	required
STMMW_13991	ssaC	1476916	1478409	1	288	0.0803213	1494	120	putative outer membrane secretory protein	not required
STMMW_14001	ssaD	1478390	1479601	1	130	0.0643564	1212	78	putative pathogenicity island protein	ambiguous
STMMW_14011	ssaE	1479609	1479851	1	10	0.0246914	243	6	type three secretion system protein	required
STMMW_14021	sseA	1480115	1480441	1	11	0.0244648	327	8	putative pathogenicity island protein	required
STMMW_14031	sseBa	1480448	1481038	1	135	0.121827	591	72	putative pathogenicity island effector effector protein	not required
STMMW_14041	sscA	1481035	1481508	1	58	0.092827	474	44	putative Type III secretion system chaperone protein	not required
STMMW_14051	sseC	1481511	1482965	1	188	0.0522337	1455	76	putative pathogenicity island effector protein	ambiguous
STMMW_14061	sseD	1482981	1483568	1	367	0.222789	588	131	putative pathogenicity island effector protein	not required
STMMW_14071	sseE	1483571	1483987	1	90	0.088729	417	37	putative pathogenicity island effector protein	not required
STMMW_14081	sscB	1484039	1484473	1	104	0.11954	435	52	putative pathogenicity island protein	not required
STMMW_14091	sseF	1484489	1485271	1	351	0.181354	783	142	putative pathogenicity island effector protein	not required
STMMW_14101	sseG	1485268	1485957	1	349	0.134783	690	93	putative pathogenicity island effector protein	not required
STMMW_14111	ssaG	1486051	1486266	1	5	0.0185185	216	4	putative pathogenicity island protein	required
STMMW_14121	ssaH	1486307	1486534	1	3	0.0131579	228	3	Type three secretion system apparatus	required
STMMW_14131	ssaI	1486546	1486794	1	2	0.00401606	249	1	putative pathogenicity island protein	required
STMMW_14141	ssaJ	1486791	1487540	1	13	0.00933333	750	7	putative pathogenicity island lipoprotein	required
STMMW_14151	STMMW_14151	1487558	1488106	1	4	0.00728597	549	4	putative pathogenicity island protein	required
STMMW_14161	ssaK	1488103	1488777	1	99	0.0740741	675	50	putative pathogenicity island protein	not required
STMMW_14171	ssaL	1488743	1489759	1	321	0.14061	1017	143	putative secretion system protein	not required
STMMW_14181	ssaM	1489817	1490185	1	31	0.0623306	369	23	putative pathogenicity island protein	ambiguous
STMMW_14191	ssaV	1490170	1492215	1	528	0.121701	2046	249	putative type III secretion protein	not required
STMMW_14201	ssaN	1492205	1493506	1	465	0.121352	1302	158	putative type III secretion ATP synthase	not required
STMMW_14211	ssaO	1493455	1493886	1	124	0.0671296	432	29	putative type III secretion protein	ambiguous
STMMW_14221	ssaP	1493867	1494241	1	234	0.24	375	90	putative type III secretion protein	not required
STMMW_14231	ssaQ	1494222	1495190	1	564	0.170279	969	165	putative type III secretion protein	not required
STMMW_14241	ssaR	1495258	1495905	1	10	0.00617284	648	4	putative type III secretion protein	required
STMMW_14251	ssaS	1495902	1496168	1	4	0.00749064	267	2	putative type III secretion protein	required
STMMW_14261	ssaT	1496169	1496948	1	3	0.0025641	780	2	putative type III secretion protein	required
STMMW_14271	ssaU	1496945	1498003	1	103	0.0557129	1059	59	putative type III secretion protein	ambiguous
STMMW_14281	norM	1498476	1499849	-1	237	0.0604076	1374	83	Multidrug-efflux transporter	ambiguous
STMMW_14291	ribE	1500066	1500707	1	17	0.0124611	642	8	riboflavin synthase alpha chain	required
STMMW_14301	cfa	1500749	1501897	-1	240	0.0844212	1149	97	cyclopropane-fatty-acyl-phospholipid synthase	not required
STMMW_14311	ydhC	1502187	1503392	-1	100	0.0389718	1206	47	putative integral membrane transport protein	required
STMMW_14321	ydhB	1503505	1504437	1	186	0.0632369	933	59	putative transcriptional regulator	ambiguous
STMMW_14331	purR	1504434	1505459	-1	109	0.0380117	1026	39	purine nucleotide synthesis repressor	required
STMMW_14332	ynhF	1505755	1505844	1	2	0.0111111	90	1	conserved sORF	required
STMMW_14341	sodB	1505927	1506508	-1	96	0.0549828	582	32	superoxide dismutase	ambiguous
STMMW_14351	ydhO	1506635	1507489	-1	96	0.0549708	855	47	putative secreted protein	ambiguous
STMMW_14361	ydhD	1507791	1508138	1	16	0.0316092	348	11	conserved hypothetical protein	required
STMMW_14371	rnt	1508216	1508863	-1	21	0.029321	648	19	Exoribonuclease T	required
STMMW_14381	gloA	1508964	1509371	-1	46	0.0661765	408	27	lactoylglutathione lyase	ambiguous
STMMW_14391	nemA	1509440	1510537	-1	134	0.0491803	1098	54	N-ethylmaleimide reductase	ambiguous
STMMW_14401	ydhM	1510596	1511195	-1	63	0.0583333	600	35	putative TetR-family transcriptional regulator	ambiguous
STMMW_14411	ydhL	1511298	1511537	1	41	0.0541667	240	13	conserved hypothetical protein	ambiguous
STMMW_14421	ydhF	1511588	1512484	1	143	0.06466	897	58	putative oxidoreductase	ambiguous
STMMW_14431	sodCb	1512564	1513085	1	144	0.0957854	522	50	copper-zinc superoxide dismutase	not required
STMMW_14441	STMMW_14441	1513061	1515100	-1	742	0.12451	2040	254	putative membrane protein	not required
STMMW_14451	ydhJ	1515100	1515996	-1	162	0.0735786	897	66	putative HlyD-family protein	not required
STMMW_14461	ydhI	1515963	1516199	-1	29	0.0675105	237	16	putative membrane protein	ambiguous
STMMW_14471	slyA	1516394	1516834	1	7	0.0136054	441	6	Transcriptional regulator	required
STMMW_14481	slyB	1516882	1517349	-1	137	0.100427	468	47	outer membrane lipoprotein SlyB precursor	not required
STMMW_14491	anmK	1517621	1518742	1	244	0.0668449	1122	75	conserved hypothetical protein	ambiguous
STMMW_14501	mliC	1518830	1519159	1	44	0.0666667	330	22	lipoprotein	ambiguous
STMMW_14511	pdxH	1519218	1519874	1	0	0	657	0	pyridoxamine 5'-phosphate oxidase	required
STMMW_14521	tyrS	1520001	1521275	1	6	0.00392157	1275	5	tyrosyl-tRNA synthetase	required
STMMW_14531	pdxY	1521335	1522195	1	199	0.0824623	861	71	pyridoxamine kinase (ec 2.7.1.35) (pm kinase)	not required
STMMW_14541	gst	1522254	1522859	-1	77	0.0561056	606	34	glutathione S-transferase	ambiguous
STMMW_14551	tppB	1522964	1524469	-1	312	0.0743692	1506	112	putative proton/oligopeptide symporter	not required
STMMW_14561	nth	1525071	1525706	-1	86	0.0550314	636	35	endonuclease III	ambiguous
STMMW_14571	rnfE	1525706	1526398	-1	88	0.0548341	693	38	electron transport complex protein	ambiguous
STMMW_14581	rnfG	1526401	1527021	-1	70	0.0805153	621	50	electron transport complex protein RnfG	not required
STMMW_14591	rnfD	1527025	1528083	-1	104	0.0538244	1059	57	electron transport complex protein RnfD	ambiguous
STMMW_14601	rnfC	1528084	1530291	-1	505	0.0878623	2208	194	Electron transport complex protein rnfC	not required
STMMW_14611	rnfB	1530284	1530862	-1	103	0.0673575	579	39	Electron transport complex protein rnfB	ambiguous
STMMW_14621	rnfA	1530862	1531443	-1	69	0.04811	582	28	electron transport complex protein RnfA	ambiguous
STMMW_14631	ydgK	1531520	1531960	-1	59	0.0612245	441	27	putative membrane protein	ambiguous
STMMW_14641	ydgT	1532049	1532264	-1	39	0.0740741	216	16	conserved hypothetical protein	not required
STMMW_14642	blr	1532562	1532687	-1	37	0.0952381	126	12	conserved sORF	not required
STMMW_14651	ydgJ	1532895	1533935	1	164	0.0585975	1041	61	putative oxidoreductase	ambiguous
STMMW_14661	add	1534010	1535011	-1	90	0.0439122	1002	44	Adenosine aminohydrolase	required
STMMW_14671	ydgA	1535715	1537223	-1	234	0.0656064	1509	99	exported protein	ambiguous
STMMW_14681	manA	1537326	1538501	-1	288	0.0935374	1176	110	mannose-6-phosphate isomerase	not required
STMMW_14691	fumA	1538701	1540347	1	160	0.0473588	1647	78	fumarate hydratase class I, aerobic	required
STMMW_14701	fumC	1540515	1541918	1	303	0.0833333	1404	117	Fumarase C	not required
STMMW_14711	tus	1541915	1542844	-1	92	0.0516129	930	48	DNA replication terminus site-binding protein	ambiguous
STMMW_14721	rstB	1542920	1544221	-1	188	0.046851	1302	61	two component sensor kinase	required
STMMW_14731	STMMW_14731	1544332	1546038	-1	315	0.0726421	1707	124	conserved hypothetical protein	ambiguous
STMMW_14741	ompN	1546191	1547324	-1	458	0.120811	1134	137	outer membrane protein	not required
STMMW_14751	rstA	1547804	1548535	-1	179	0.121585	732	89	putative two-component response regulator	not required
STMMW_14761	ydgC	1548662	1548997	1	121	0.136905	336	46	putative membrane protein	not required
STMMW_14771	ydgI	1549059	1550441	-1	232	0.0817064	1383	113	putative amino acid permease	not required
STMMW_14781	ydgH	1550740	1551684	-1	183	0.0804233	945	76	putative exported protein	not required
STMMW_14791	pntA	1552211	1553740	1	233	0.0627451	1530	96	pyridine nucleotide transhydrogenase subunit- alpha	ambiguous
STMMW_14801	pntB	1553751	1555139	1	193	0.0518359	1389	72	pyridine nucleotide transhydrogenase subunit- beta	ambiguous
STMMW_14811	tqsA	1555314	1556348	-1	416	0.160386	1035	166	putative membrane protein	not required
STMMW_14821	ydgF	1556766	1557128	1	216	0.22865	363	83	putative conserved membrane protein	not required
STMMW_14831	ydgE	1557115	1557444	1	66	0.10303	330	34	putative membrane protein	not required
STMMW_14841	STMMW_14841	1557484	1558305	-1	93	0.0486618	822	40	putative secreted protein	ambiguous
STMMW_14851	asr	1558574	1558858	-1	21	0.045614	285	13	putative secreted stress response protein	required
STMMW_14861	ynfM	1559217	1560470	-1	86	0.0382775	1254	48	putative membrane transport protein	required
STMMW_14871	ynfL	1560590	1561489	1	143	0.0611111	900	55	putative regulatory protein	ambiguous
STMMW_14881	mlc	1561617	1562837	1	126	0.0507781	1221	62	putative regulatory protein	ambiguous
STMMW_14891	bioDb	1562963	1563658	1	164	0.0818966	696	57	DTB synthetase	not required
STMMW_14901	clcB	1563614	1564903	-1	136	0.0449612	1290	58	Voltage-gated ClC-type chloride channel clcB. Putative chloride channel protein clcB-like	required
STMMW_14911	STMMW_14911	1565039	1566187	-1	271	0.0748477	1149	86	putative ABC transporter ATP/GTP-binding protein	not required
STMMW_14921	STMMW_14921	1566187	1566834	-1	74	0.0679012	648	44	putative ABC transporter membrane protein	ambiguous
STMMW_14931	STMMW_14931	1566844	1567746	-1	132	0.0653378	903	59	putative ABC transporter periplasmic binding protein	ambiguous
STMMW_14941	STMMW_14941	1567775	1568485	-1	132	0.0576653	711	41	putative ABC transporter membrane protein	ambiguous
STMMW_14951	ynfI	1568790	1569404	-1	96	0.0601626	615	37	conserved hypothetical protein	ambiguous
STMMW_14961	STMMW_14961	1569447	1570304	-1	243	0.0990676	858	85	putative dimethyl sulphoxide reductase subunit	not required
STMMW_14971	STMMW_14971	1570306	1570923	-1	233	0.158576	618	98	putative anaerobic dimethyl sulfoxide reductase	not required
STMMW_14981	dmsA2	1570934	1573369	-1	494	0.0779967	2436	190	putative dimethyl sulphoxide reductase subunit	not required
STMMW_14991	dmsA1	1573468	1575909	-1	872	0.100737	2442	246	putative dimethyl sulphoxide reductase subunit	not required
STMMW_15001	ynfD	1576063	1576371	-1	11	0.0194175	309	6	putative exported protein	required
STMMW_15011	ynfC	1576466	1577185	1	62	0.0305556	720	22	putative exported protein	required
STMMW_15021	speG	1577226	1577786	-1	104	0.0855615	561	48	spermidine N1-acetyltransferase	not required
STMMW_15031	ynfB	1577822	1578163	-1	61	0.0818713	342	28	putative secreted protein	not required
STMMW_15041	ynfA	1578316	1578642	1	76	0.0703364	327	23	putative membrane protein	ambiguous
STMMW_15051	rspA	1578764	1579978	1	200	0.0666667	1215	81	starvation sensing protein RspA	ambiguous
STMMW_15061	rspB	1579989	1581008	1	198	0.0578431	1020	59	starvation sensing protein RspB	ambiguous
STMMW_15071	ydfJ	1581062	1582438	1	238	0.0755265	1377	104		not required
STMMW_15081	ydfI	1582585	1584051	1	179	0.0443081	1467	65	putative D-mannonate oxidoreductase	required
STMMW_15091	ydfZ	1584118	1584321	-1	39	0.0833333	204	17	conserved hypothetical protein	not required
STMMW_15101	ydfH	1584502	1585188	-1	109	0.0378457	687	26	putative regulatory protein	required
STMMW_15111	ydfG	1585318	1586064	-1	127	0.0709505	747	53	putative oxidoreductase	ambiguous
STMMW_15121	dcp	1586203	1588245	1	359	0.0665688	2043	136	dipeptidyl carboxypeptidase II	ambiguous
STMMW_15131	STMMW_15131	1588590	1588772	1	0	0	183	0	conserved hypothetical protein	required
STMMW_15141	ydeJ	1588892	1589419	-1	161	0.132576	528	70	conserved hypothetical protein	not required
STMMW_15151	ydeI	1589846	1590238	1	58	0.101781	393	40	putative periplasmic protein	not required
STMMW_15161	ydeE	1590932	1592105	-1	192	0.076661	1174	90	putative membrane protein (pseudogene)	not required
STMMW_15171	ydeD	1592333	1593235	1	89	0.047619	903	43	putative membrane protein	ambiguous
STMMW_15181	marB	1593354	1593569	-1	86	0.134259	216	29	multiple antibiotic resistance protein MarB	not required
STMMW_15191	marA	1593598	1594032	-1	43	0.0643678	435	28	multiple antibiotic resistance protein MarA	ambiguous
STMMW_15201	marR	1594001	1594435	-1	50	0.062069	435	27	multiple antibiotic resistance protein MarR	ambiguous
STMMW_15211	marC	1594694	1595359	1	103	0.0705706	666	47	putative membrane protein	ambiguous
STMMW_15221	sotB	1595406	1596590	-1	332	0.0700422	1185	83	Probable sugar efflux transporter	ambiguous
STMMW_15231	yneJ	1596706	1597578	-1	199	0.0836197	873	73	putative regulatory protein	not required
STMMW_15241	yneI	1597681	1599069	1	131	0.0410367	1389	57	putative oxidoreductase	required
STMMW_15251	yneH	1599142	1600068	1	97	0.0517799	927	48	probable glutaminase	ambiguous
STMMW_15261	yneG	1600068	1600427	1	48	0.0583333	360	21	conserved hypothetical protein	ambiguous
STMMW_15271	STMMW_15271	1600651	1601598	1	247	0.0886076	948	84	putative membrane protein	not required
STMMW_15281	STMMW_15281	1601654	1602196	-1	119	0.06814	543	37	putative exported protein	ambiguous
STMMW_15291	STMMW_15291	1603015	1604031	1	274	0.102262	1017	104	outer membrane protein	not required
STMMW_15301	STMMW_15301	1604172	1604513	-1	154	0.192982	342	66	hydrogenase nickel incorporation protein (HypA)	not required
STMMW_15311	STMMW_15311	1604526	1605413	-1	124	0.0698198	888	62	putative ATP/GTP-binding protein	ambiguous
STMMW_15321	hyaF2	1605401	1606462	-1	190	0.0640301	1062	68	hydrogenase-1 operon protein HyaF2	ambiguous
STMMW_15331	hyaE2	1606480	1606890	-1	91	0.0827251	411	34	hydrogenase-1 operon protein HyaE2	not required
STMMW_15341	STMMW_15341	1606887	1607231	-1	84	0.0869565	345	30	hydrogenase isoenzymes formation protein	not required
STMMW_15351	hyaD2	1607186	1607794	-1	67	0.0410509	609	25	hydrogenase 1 maturation protease	required
STMMW_15361	hyaC2	1607800	1608543	-1	49	0.0268817	744	20	Ni/Fe-hydrogenase 1 b-type cytochrome subunit HyaC2	required
STMMW_15371	hyaB2	1608494	1610296	-1	384	0.0743206	1803	134	uptake hydrogenase-1 large subunit	not required
STMMW_15381	hyaA2	1610299	1611402	-1	167	0.0507246	1104	56	uptake hydrogenase small subunit	ambiguous
STMMW_15391	STMMW_15391	1611831	1612922	1	164	0.0989011	1092	108	putative secreted hydrolase	not required
STMMW_15401	STMMW_15401	1613088	1613759	1	71	0.0625	672	42	putative regulatory protein	ambiguous
STMMW_15411	STMMW_15411	1613818	1614843	-1	172	0.0662768	1026	68	putative alcohol dehydrogenase	ambiguous
STMMW_15421	STMMW_15421	1614818	1616104	-1	108	0.0520591	1287	67	membrane transport protein	ambiguous
STMMW_15431	pqaA	1616281	1617837	-1	29	0.00834939	1557	13	PhoPQ-activated protein	required
STMMW_15441	STMMW_15441	1617907	1619148	-1	163	0.0877617	1242	109	putative multidrug efflux protein	not required
STMMW_15451	STMMW_15451	1619138	1620643	-1	216	0.0524568	1506	79	putative monooxygenase	ambiguous
STMMW_15461	STMMW_15461	1620688	1621176	1	63	0.0470348	489	23	putative regulatory protein	required
STMMW_15471	STMMW_15471	1621408	1621738	1	15	0.0181269	331	6	(pseudogene)	required
STMMW_15481	STMMW_15481	1621740	1622159	-1	25	0.0357143	420	15	(pseudogene)	required
STMMW_15482	STMMW_15482	1622443	1622652	-1	1	0.0047619	210	1	conserved hypothetical protein	required
STMMW_15491	srgE	1622922	1624388	-1	9	0.00408998	1467	6	conserved hypothetical protein	required
STMMW_15501	STMMW_15501	1624647	1625654	1	102	0.0595238	1008	60	putative putative LacI-family transcriptional regulator	ambiguous
STMMW_15511	STMMW_15511	1625798	1627249	1	245	0.065427	1452	95	putative Na /H antiporter	ambiguous
STMMW_15521	STMMW_15521	1627262	1628464	1	96	0.039069	1203	47	putative aminotransferase	required
STMMW_15531	STMMW_15531	1628577	1630652	-1	413	0.0915222	2076	190	putative glycogen debranching protein	not required
STMMW_15541	STMMW_15541	1630709	1633237	-1	1060	0.0822459	2529	208	putative hydrolase	not required
STMMW_15551	STMMW_15551	1633234	1635018	-1	357	0.0745098	1785	133	putative hydrolase	not required
STMMW_15561	STMMW_15561	1635147	1635932	-1	138	0.06743	786	53	putative exported protein	ambiguous
STMMW_15571	hdeB	1636075	1636404	-1	183	0.166667	330	55	putative secreted protein	not required
STMMW_15581	osmC	1636754	1637185	-1	117	0.087963	432	38	osmotically inducible protein C	not required
STMMW_15591	yddX	1637698	1637913	1	261	0.333333	216	72	conserved hypothetical protein	not required
STMMW_15601	rpsV	1638008	1638151	1	72	0.208333	144	30	30S ribosomal protein S22	not required
STMMW_15611	sfcA	1638328	1640025	1	238	0.0694935	1698	118	NAD-linked malic enzyme	ambiguous
STMMW_15621	adhP	1640392	1641321	1	145	0.0580645	930	54	alcohol dehydrogenase	ambiguous
STMMW_15631	fdnI	1641412	1642053	-1	168	0.124611	642	80	formate dehydrogenase, nitrate-inducible, cytochrome b556(fdn) subunit (formate dehydrogenase-n gamma subunit) (fdh-n gamma subunit) (anaerobic formate dehydrogenase cytochrome b556 subunit)	not required
STMMW_15641	fdnH	1642061	1642945	-1	108	0.0587571	885	52	formate dehydrogenase, nitrate-inducible, iron- sulfur subunit (formate dehydrogenase-n beta subunit) (fdh- n beta subunit) (anaerobic formate dehydrogenase iron- sulfur subunit)	ambiguous
STMMW_15651	fdnG	1642959	1646006	-1	613	0.078084	3048	238	formate dehydrogenase N (nitrate-inducible, alpha subunit)	not required
STMMW_15661	yddG	1646341	1647165	1	561	0.202424	825	167	putative integral membrane protein	not required
STMMW_15671	ompD	1647690	1648778	1	178	0.0798898	1089	87	outer membrane porin protein (ompD)	not required
STMMW_15681	STMMW_15681	1648922	1649302	1	44	0.0603675	381	23	conserved hypothetical protein	ambiguous
STMMW_15691	smvA	1649327	1650814	-1	294	0.0745968	1488	111	methyl viologen resistance protein SmvA	not required
STMMW_15701	STMMW_15701	1650931	1651509	1	45	0.0276339	579	16	putative regulatory protein	required
STMMW_15711	narU	1651724	1653112	1	211	0.0719942	1389	100	nitrite extrusion protein	ambiguous
STMMW_15721	narZ	1653204	1656944	1	848	0.0978348	3741	366	respiratory nitrate reductase 2 alpha chain	not required
STMMW_15731	narY	1656941	1658485	1	381	0.100324	1545	155	respiratory nitrate reductase 2 beta chain	not required
STMMW_15741	narW	1658485	1659180	1	96	0.0603448	696	42	respiratory nitrate reductase 2 delta chain	ambiguous
STMMW_15751	narV	1659177	1659857	1	168	0.0881057	681	60	respiratory nitrate reductase 2 gamma chain	not required
STMMW_15761	yddE	1659963	1660856	1	215	0.0917226	894	82	conserved hypothetical protein	not required
STMMW_15771	nhoA	1660892	1661737	-1	95	0.035461	846	30	N-hydroxyarylamine O-acetyltransferase	required
STMMW_15781	steA	1662021	1662653	-1	225	0.116904	633	74	hypothetical protein	not required
STMMW_15791	ansP	1663166	1664659	1	189	0.0609103	1494	91	L-asparagine permease	ambiguous
STMMW_15801	STMMW_15801	1664736	1664957	-1	68	0.117117	222	26	putative lipoprotein	not required
STMMW_15811	STMMW_15811	1665102	1666163	-1	316	0.0725047	1062	77	possible ATP-binding protein	ambiguous
STMMW_15821	yncD	1666427	1668547	1	291	0.0447902	2121	95	probable TonB-dependent receptor YncD precursor	required
STMMW_15831	yncC	1668614	1669279	-1	368	0.202703	666	135	putative regulatory protein	not required
STMMW_15841	yncB	1669613	1670683	-1	254	0.0999066	1071	107	putative NADP-dependent oxidoreductase	not required
STMMW_15851	yncA	1670862	1671377	1	53	0.0562016	516	29	putative acetyltransferase	ambiguous
STMMW_15861	ydcZ	1671377	1671826	1	42	0.0444444	450	20	putative membrane protein	required
STMMW_15871	ydcY	1671831	1672064	-1	53	0.0982906	234	23	conserved hypothetical protein	not required
STMMW_15881	srfA	1672288	1673607	1	265	0.0780303	1320	103	putative virulence effector protein	not required
STMMW_15891	srfB	1673612	1676593	1	1186	0.109993	2982	328	putative virulence effector protein	not required
STMMW_15901	srfC	1676590	1678734	1	550	0.0769231	2145	165	putative virulence effector protein	not required
STMMW_15911	ydcX	1678779	1679042	-1	9	0.0189394	264	5	putative membrane protein	required
STMMW_15921	ydcW	1679351	1680796	-1	198	0.0539419	1446	78	putative aldehyde dehydrogenase	ambiguous
STMMW_15931	ydcR	1680911	1682335	-1	102	0.037193	1425	53	putative regulatory protein	required
STMMW_15941	pdgL	1682471	1683241	-1	139	0.0661479	771	51	D-alanyl-D-alanine dipeptidase	ambiguous
STMMW_15951	STMMW_15951	1683500	1683730	-1	55	0.0995671	231	23	conserved hypothetical protein	not required
STMMW_15961	ugtL	1683763	1684161	-1	22	0.0200501	399	8	putative membrane protein	required
STMMW_15971	sifB	1684698	1685648	1	4	0.0042061	951	4	hypothetical protein	required
STMMW_15981	yncJ	1685922	1686152	1	65	0.0995671	231	23	putative exported protein	not required
STMMW_15991	ydcP	1686153	1688117	-1	283	0.0402036	1965	79	putative peptidase	required
STMMW_16001	ydcN	1688196	1688732	-1	51	0.0409683	537	22	putative DNA-binding protein	required
STMMW_16011	STMMW_16011	1688823	1690001	1	158	0.0559796	1179	66	putative benzoate membrane transport protein	ambiguous
STMMW_16021	STMMW_16021	1690055	1690723	-1	104	0.0553064	669	37	putative lipoprotein	ambiguous
STMMW_16031	tehB	1690879	1691475	-1	148	0.128978	597	77	tellurite resistance protein TehB	not required
STMMW_16041	tehA	1691462	1692475	-1	273	0.112426	1014	114	tellurite resistance protein TehA	not required
STMMW_16051	ydcK	1692582	1693562	1	238	0.100917	981	99	putative transferase	not required
STMMW_16061	rimL	1693559	1694098	-1	127	0.112963	540	61	ribosomal-protein-serine acetyltransferase	not required
STMMW_16071	STMMW_16071	1694315	1695433	1	218	0.0893655	1119	100	conserved hypothetical protein	not required
STMMW_16081	STMMW_16081	1695430	1695711	1	57	0.0638298	282	18	putative phosphotransferase enzyme	ambiguous
STMMW_16091	STMMW_16091	1695863	1697035	1	238	0.0869565	1173	102	putative phosphotransferase enzyme	not required
STMMW_16101	STMMW_16101	1697049	1697855	1	143	0.0508055	807	41	conserved hypothetical protein	ambiguous
STMMW_16111	STMMW_16111	1697987	1698424	1	113	0.100457	438	44	putative phosphotransferase enzyme	not required
STMMW_16121	STMMW_16121	1698436	1699068	1	316	0.0947867	633	60	putative ribulose-5-phosphate 3-epimerase	not required
STMMW_16131	STMMW_16131	1699084	1699875	1	129	0.0530303	792	42	putative regulatory protein	ambiguous
STMMW_16141	aac	1699875	1700312	1	65	0.0342466	438	15	aminoglycoside 6'-N-acetyltransferase	required
STMMW_16151	STMMW_16151	1700359	1701561	-1	590	0.195345	1203	235	putative L-lactate oxidase	not required
STMMW_16161	STMMW_16161	1701573	1702148	-1	60	0.0711806	576	41	putative exported protein	ambiguous
STMMW_16171	ydcG	1702344	1703999	-1	350	0.0911836	1656	151	Glucans biosynthesis protein D precursor	not required
STMMW_16181	STMMW_16181	1704219	1705727	-1	213	0.047051	1509	71	putative esterase	required
STMMW_16191	STMMW_16191	1705776	1707119	-1	256	0.0751488	1344	101	conserved hypothetical protein	not required
STMMW_16201	ydcI	1707412	1708335	1	68	0.0400433	924	37	putative LysR-family transcriptional regulatory protein	required
STMMW_16211	trg	1708396	1710021	-1	271	0.0688807	1626	112	methyl-accepting chemotaxis protein III (mcp- iii) (ribose and galactose chemoreceptor protein)	ambiguous
STMMW_16221	adhC	1710190	1711308	-1	150	0.0670241	1119	75	alcohol dehydrogenase class III (ec 1.1.1.1) (glutathione-dependent formaldehyde dehydrogenase) (ec 1.2.1.1) (fdh) (faldh)	ambiguous
STMMW_16231	STMMW_16231	1711340	1711615	-1	42	0.057971	276	16	conserved hypothetical protein	ambiguous
STMMW_16241	steB	1712138	1712539	1	1	0.00248756	402	1	conserved hypothetical protein	required
STMMW_16251	STMMW_16251	1712668	1713384	-1	0	0	717	0	putative membrane protein	required
STMMW_16261	sseJ	1713810	1715036	1	19	0.0114099	1227	14	salmonella translocated effector protein (SseJ)	required
STMMW_16271	STMMW_16271	1715157	1715501	-1	77	0.107246	345	37	putative membrane protein	not required
STMMW_16281	STMMW_16281	1716408	1717169	1	3	0.00262467	762	2	putative periplasmic amino acid-binding protein	required
STMMW_16291	STMMW_16291	1717176	1717823	1	0	0	648	0	putative ABC amino acid transporter permease	required
STMMW_16301	STMMW_16301	1717848	1718579	1	53	0.0218579	732	16	ABC transporter ATP-binding subunit	required
STMMW_16311	STMMW_16311	1718576	1719256	1	8	0.00734214	681	5	putative amino acid ABC transporter	required
STMMW_16321	STMMW_16321	1719393	1720943	1	170	0.0580271	1551	90	putative membrane protein (pseudogene)	ambiguous
STMMW_16331	STMMW_16331	1721407	1722069	1	170	0.152338	663	101	possible methyltransferase	not required
STMMW_16341	cybB	1722340	1722870	-1	226	0.178908	531	95	cytochrome b561 (cytochrome b-561)	not required
STMMW_16351	ydcF	1722987	1723787	-1	84	0.0524345	801	42	conserved hypothetical protein	ambiguous
STMMW_16361	hrpA	1723851	1727753	-1	509	0.0561107	3903	219	ATP-dependent helicase HrpA	ambiguous
STMMW_16371	acpD	1727954	1728559	1	117	0.0841584	606	51	ACP phosphodiesterase	not required
STMMW_16381	STMMW_16381	1728556	1729005	-1	101	0.102222	450	46	hypothetical protein	not required
STMMW_16391	ydbL	1729148	1729471	-1	200	0.222222	324	72	putative secreted protein	not required
STMMW_16401	ynbE	1729479	1729670	-1	64	0.145833	192	28	putative lipoprotein	not required
STMMW_16411	ydbH	1729670	1732306	-1	618	0.100114	2637	264	putative exported protein	not required
STMMW_16421	ldhA	1732546	1733535	1	940	0.10202	990	101	D-lactate dehydrogenase	not required
STMMW_16431	hslJ	1733646	1734056	1	82	0.104623	411	43	heat shock protein (hslJ)	not required
STMMW_16441	STMMW_16441	1734100	1734255	-1	13	0.0512821	156	8	conserved hypothetical protein	ambiguous
STMMW_16451	STMMW_16451	1734282	1734581	1	14	0.0233333	300	7	conserved hypothetical protein	required
STMMW_16461	nifJ	1734642	1738166	1	806	0.0811348	3525	286	probable pyruvate-flavodoxin oxidoreductase	not required
STMMW_16471	ynaF	1738648	1739082	1	127	0.101149	435	44	conserved hypothetical protein	not required
STMMW_16481	STMMW_16481	1739132	1739470	-1	133	0.138643	339	47	Putative multi-drug transporter	not required
STMMW_16491	STMMW_16491	1739571	1739771	1	44	0.0945274	201	19		not required
STMMW_16501	ydaO	1739826	1740761	1	278	0.119658	936	112	conserved hypothetical protein	not required
STMMW_16511	dbpA	1740805	1742178	-1	225	0.0582242	1374	80	ATP-independent RNA helicase (DbpA)	ambiguous
STMMW_16521	zntB	1742665	1743648	-1	177	0.0731707	984	72	putative membrane transport protein	not required
STMMW_16531	STMMW_16531	1743794	1744948	-1	296	0.0857143	1155	99	putative chemo-receptor protein	not required
STMMW_16541	ydaL	1745359	1745922	-1	337	0.225177	564	127	conserved hypothetical protein	not required
STMMW_16551	ogt	1746180	1746695	1	86	0.0794574	516	41	O6-methylguanine-DNA-alkyltransferase	not required
STMMW_16561	fnr	1746849	1747643	1	78	0.0415094	795	33	fumarate and nitrate reduction regulatory protein	required
STMMW_16571	ydaA	1747794	1748741	1	178	0.0864979	948	82	conserved hypothetical protein	not required
STMMW_16581	ynaJ	1748796	1749050	-1	63	0.0901961	255	23	putative membrane protein	not required
STMMW_16591	ynaI	1749289	1750320	1	249	0.119186	1032	123	putative membrane protein	not required
STMMW_16601	STMMW_16601	1750406	1751008	-1	100	0.0945274	603	57	conserved hypothetical DNA-binding protein	not required
STMMW_16611	STMMW_16611	1751052	1751738	1	148	0.062591	687	43	conserved hypothetical protein	ambiguous
STMMW_16621	STMMW_16621	1752210	1752767	-1	22	0.0215054	558	12	putative thiol peroxidase	required
STMMW_16631	STMMW_16631	1752866	1753696	-1	45	0.0312876	831	26	putative exported protein	required
STMMW_16641	STMMW_16641	1753717	1755699	-1	537	0.111952	1983	222	invasin-like protein	not required
STMMW_16651	STMMW_16651	1755774	1756619	-1	237	0.13357	846	113	putative lipoprotein	not required
STMMW_16661	STMMW_16661	1756919	1757771	1	1	0.00117233	853	1	putative transcriptional regulator (Pseudogene)	required
STMMW_16671	STMMW_16671	1758162	1759271	1	255	0.0927928	1110	103	hypothetical protein	not required
STMMW_16681	STMMW_16681	1759485	1759739	-1	122	0.247059	255	63	putative lipoprotein	not required
STMMW_16691	STMMW_16691	1759850	1760440	-1	107	0.0846024	591	50	putative transcriptional regulator	not required
STMMW_16701	STMMW_16701	1760518	1761231	1	100	0.057423	714	41	putative oxidoreductase	ambiguous
STMMW_16711	STMMW_16711	1761322	1762191	-1	170	0.0885057	870	77	putative oxidoreductase	not required
STMMW_16721	STMMW_16721	1762465	1763370	-1	160	0.0706402	906	64	putative transcriptional regulator	ambiguous
STMMW_16731	STMMW_16731	1763489	1764418	1	268	0.0989247	930	92	putative oxidoreductase	not required
STMMW_16741	mppA	1764515	1766128	-1	595	0.159232	1614	257	periplasmic murein peptide-binding protein MppA	not required
STMMW_16751	ycjI	1766318	1767046	1	138	0.0740741	729	54	conserved hypothetical protein	not required
STMMW_16761	ycjG	1767021	1767986	-1	118	0.0414079	966	40	putative mandelate racemase / muconate lactonizing enzyme family protein	required
STMMW_16771	tpx	1768102	1768608	1	110	0.086785	507	44	Probable thiol peroxidase	not required
STMMW_16781	tyrR	1768698	1770239	-1	41	0.0162127	1542	25	transcriptional regulatory protein TyrR	required
STMMW_16791	ycjF	1770387	1771448	-1	206	0.0677966	1062	72	putative membrane protein	ambiguous
STMMW_16801	ycjX	1771445	1772848	-1	309	0.0868946	1404	122	putative ATP-binding protein	not required
STMMW_16811	pspE	1772991	1773305	-1	149	0.187302	315	59	phage shock protein E precursor	not required
STMMW_16821	pspD	1773381	1773599	-1	122	0.283105	219	62	phage shock protein D	not required
STMMW_16831	pspC	1773622	1773981	-1	80	0.0722222	360	26	phage shock protein C	ambiguous
STMMW_16841	pspB	1773981	1774205	-1	57	0.0844444	225	19	phage shock protein B	not required
STMMW_16851	pspA	1774265	1774933	-1	74	0.0523169	669	35	phage shock protein A	ambiguous
STMMW_16861	pspF	1775104	1776084	1	305	0.0397554	981	39	psp operon transcriptional activator PspF	required
STMMW_16871	sapA	1776196	1777845	1	41	0.0151515	1650	25	peptide transport periplasmic protein SapA precursor	required
STMMW_16881	sapB	1778013	1778807	1	15	0.0138365	795	11	peptide transport system permease protein SapB	required
STMMW_16891	sapC	1778794	1779684	1	104	0.0112233	891	10	peptide transport system permease protein SapC	required
STMMW_16901	sapD	1779684	1780676	1	2	0.0020141	993	2	peptide transport system ATP-binding protein SapD	required
STMMW_16911	sapF	1780678	1781484	1	18	0.0123916	807	10	peptide transport system ATP-binding protein SapF	required
STMMW_16921	STMMW_16921	1781500	1782207	-1	14	0.0169492	708	12	conserved hypothetical protein	required
STMMW_16931	steC	1782674	1784047	-1	45	0.0152838	1374	21	hypothetical protein	required
STMMW_16941	STMMW_16941	1784082	1784261	1	3	0.00555556	180	1	conserved hypothetical protein	required
STMMW_16951	ycjE	1784236	1784535	1	141	0.2	300	60	conserved hypothetical protein	not required
STMMW_16961	fabI	1784653	1785441	1	2	0.00126743	789	1	enoyl-[acyl-carrier-protein] reductase (NADH)	required
STMMW_16971	yciW	1785641	1786774	1	213	0.0634921	1134	72	conserved hypothetical protein	ambiguous
STMMW_16981	rnb	1786863	1788797	1	191	0.0449612	1935	87	RNase II	required
STMMW_16991	yciR	1789059	1791041	1	248	0.0549672	1983	109	conserved hypothetical protein	ambiguous
STMMW_16992	STMMW_16992	1791163	1791342	1	30	0.1	180	18	hypothetical protein	not required
STMMW_17001	yciT	1791429	1792181	1	138	0.0717131	753	54	putative regulatory protein	ambiguous
STMMW_17002	osmB	1792440	1792658	1	86	0.141553	219	31	osmotically inducible lipoprotein B precursor	not required
STMMW_17011	yciH	1792778	1793104	-1	41	0.0703364	327	23	putative translation initiaiton factor	ambiguous
STMMW_17021	pyrF	1793104	1793841	-1	106	0.0352304	738	26	OMP decarboxylase	required
STMMW_17031	yciM	1794032	1795147	-1	6	0.00448029	1116	5	conserved hypothetical protein	required
STMMW_17041	yciS	1795208	1795516	-1	13	0.0323625	309	10	putative membrane protein	required
STMMW_17051	pgpB	1795666	1796430	-1	151	0.0705882	765	54	phosphatidylglycerophosphatase B	ambiguous
STMMW_17061	ribA	1796626	1797216	1	3	0.00507614	591	3	GTP cyclohydrolase II	required
STMMW_17071	acnA	1797272	1799947	-1	232	0.04858	2676	130	aconitate hydratase 1 (citrate hydro-lyase 1)	ambiguous
STMMW_17072	ymiA	1800503	1800631	-1	7	0.0155039	129	2	hypothetical protein	required
STMMW_17081	cysB	1800924	1801898	-1	38	0.0246154	975	24	cys regulon transcriptional activator	required
STMMW_17101	topA	1802309	1804906	-1	53	0.0107775	2598	28	DNA topoisomerase I, omega protein I	required
STMMW_17111	yciN	1805309	1805560	1	25	0.0436508	252	11	conserved hypothetical protein	required
STMMW_17121	sohB	1805602	1806648	-1	190	0.0926457	1047	97	putative protease	not required
STMMW_17131	yciK	1806886	1807647	1	149	0.0853018	762	65	hypothetical oxidoreductase	not required
STMMW_17141	btuR	1807644	1808234	1	143	0.0744501	591	44	COB(I) alamin adenosyltransferase	not required
STMMW_17151	yciL	1808321	1809196	-1	35	0.0273973	876	24	putative pseudouridine synthase	required
STMMW_17161	yciO	1809297	1809917	-1	109	0.0901771	621	56	conserved hypothetical protein	not required
STMMW_17171	trpH	1809925	1810806	-1	128	0.0668934	882	59	conserved hypothetical protein	ambiguous
STMMW_17181	trpE	1811067	1812629	1	335	0.0806142	1563	126	anthranilate synthase component I	not required
STMMW_17191	trpD	1812629	1814224	1	485	0.108396	1596	173	anthranilate phosphoribosyltransferase	not required
STMMW_17201	trpC	1814228	1815586	1	321	0.0860927	1359	117	IGPS	not required
STMMW_17211	trpB	1815596	1816789	1	297	0.0912898	1194	109	tryptophan synthase beta chain	not required
STMMW_17221	trpA	1816789	1817595	1	151	0.0731103	807	59	tryptophan synthase alpha chain	not required
STMMW_17231	yciG	1818075	1818257	1	1	0.00546448	183	1	conserved hypothetical protein	required
STMMW_17241	yciF	1818347	1818850	1	37	0.0416667	504	21	conserved hypothetical protein	required
STMMW_17251	yciE	1818924	1819430	1	26	0.0414201	507	21	conserved hypothetical protein	required
STMMW_17261	katN	1819450	1820328	1	397	0.151308	879	133	conserved hypothetical protein	not required
STMMW_17271	ompW	1820410	1821048	-1	84	0.0657277	639	42	putative outer membrane protein	ambiguous
STMMW_17281	STMMW_17281	1821386	1821790	1	136	0.133333	405	54	conserved hypothetical protein	not required
STMMW_17291	yciC	1821816	1822559	1	184	0.0954301	744	71	putative membrane protein	not required
STMMW_17301	ispZ	1822616	1823155	1	53	0.0425926	540	23	Probable intracellular septation protein	required
STMMW_17311	yciA	1823316	1823717	1	76	0.0970149	402	39	putative Acyl-CoA hydrolase	not required
STMMW_17321	tonB	1823777	1824505	-1	27	0.0219479	729	16	TonB protein	required
STMMW_17331	yciI	1824729	1825025	1	57	0.0707071	297	21	conserved hypothetical protein	ambiguous
STMMW_17341	cls	1825385	1826845	1	425	0.0965092	1461	141	CL synthase	not required
STMMW_17351	yciU	1826879	1827208	1	35	0.0666667	330	22	conserved hypothetical protein	ambiguous
STMMW_17361	STMMW_17361	1827256	1828038	-1	358	0.181354	783	142	possible ion transport protein	not required
STMMW_17371	oppF	1828140	1829144	-1	175	0.080597	1005	81	oligopeptide transport ATP-binding protein (OppF)	not required
STMMW_17381	oppD	1829141	1830148	-1	214	0.0902778	1008	91	oligopeptide transport ATP-binding protein (OppD)	not required
STMMW_17391	oppC	1830160	1831068	-1	203	0.0880088	909	80	oligopeptide transport system permease protein (OppC)	not required
STMMW_17401	oppB	1831083	1832003	-1	111	0.0618893	921	57	oligopeptide transport system permease protein (OppB)	ambiguous
STMMW_17411	oppA	1832125	1833873	-1	446	0.118925	1749	208	periplasmic oligopeptide-binding protein precursor (OppA)	not required
STMMW_17421	STMMW_17421	1833824	1834138	1	122	0.184127	315	58	conserved hypothetical protein	not required
STMMW_17431	ychE	1834521	1835168	-1	152	0.114198	648	74	putative membrane protein	not required
STMMW_17441	adh	1835645	1838323	1	351	0.0526316	2679	141	alcohol dehydrogenase	ambiguous
STMMW_17451	tdk	1838520	1839137	-1	271	0.182848	618	113	thymidine kinase	not required
STMMW_17461	hns	1839800	1840213	1	0	0	414	0	DNA-binding protein (histone-like protein Hlp- II)	required
STMMW_17471	galU	1840345	1841253	-1	18	0.0154015	909	14	glucose-1-phosphate uridylyltransferase	required
STMMW_17481	hnr	1841456	1842469	-1	5	0.00493097	1014	5	putative regulatory protein	required
STMMW_17491	ychK	1842560	1843465	-1	179	0.098234	906	89	conserved hypothetical protein	not required
STMMW_17501	ychJ	1843576	1844034	1	151	0.124183	459	57	Hypothetical UPF0225 protein	not required
STMMW_17511	purU	1844085	1844927	1	299	0.132859	843	112	formyltetrahydrofolate deformylase	not required
STMMW_17521	STMMW_17521	1846243	1847718	-1	328	0.100271	1476	148	putative secreted protein	not required
STMMW_17531	narI	1848014	1848691	-1	303	0.20354	678	138	respiratory nitrate reductase 1 gamma chain	not required
STMMW_17541	narJ	1848691	1849401	-1	370	0.192686	711	137	respiratory nitrate reductase 1 delta chain	not required
STMMW_17551	narH	1849398	1850933	-1	700	0.173828	1536	267	respiratory nitrate reductase 1 beta chain	not required
STMMW_17561	narG	1850930	1854673	-1	2308	0.198718	3744	744	respiratory nitrate reductase 1 alpha chain	not required
STMMW_17571	narK	1855061	1856458	-1	513	0.148784	1398	208	nitrite extrusion protein (nitrite facilitator)	not required
STMMW_17581	narX	1856799	1858595	1	790	0.157485	1797	283	nitrate/nitrite sensor protein NarX	not required
STMMW_17591	narL	1858588	1859238	1	284	0.15361	651	100	nitrate/nitrite response regulator protein NarL	not required
STMMW_17601	ychP	1859239	1860663	-1	428	0.103158	1425	147	putative invasin	not required
STMMW_17611	ychN	1860840	1861193	1	62	0.0819209	354	29	conserved hypothetical protein	not required
STMMW_17621	chaB	1861273	1861503	-1	72	0.121212	231	28	cation transport regulator ChaB	not required
STMMW_17631	chaA	1861770	1862870	1	380	0.154405	1101	170	putative calcium/proton antiporter	not required
STMMW_17641	kdsA	1862924	1863778	-1	4	0.00350877	855	3	2-dehydro-3-deoxyphosphooctonate aldolase	required
STMMW_17651	ychA	1863816	1864625	-1	55	0.0395062	810	32	putative regulator	required
STMMW_17661	sirC	1864629	1865018	-1	162	0.192308	390	75	putative regulator	not required
STMMW_17671	hemK	1865015	1865848	-1	30	0.0215827	834	18	HemK protein, putative protoporphyrinogen oxidase	required
STMMW_17681	prfA	1865848	1866930	-1	1	0.000923361	1083	1	RF-1	required
STMMW_17691	hemA	1866971	1868227	-1	3	0.00159109	1257	2	GluTR	required
STMMW_17701	hemM	1868541	1869164	1	4	0.00160256	624	1	outer membrane lipoprotein	required
STMMW_17711	ipk	1869161	1870012	1	1	0.00117371	852	1	4-diphosphocytidyl-2-C-methyl-D-erythritol kinase	required
STMMW_17721	prs	1870278	1871225	1	94	0.0253165	948	24	ribose-phosphate pyrophosphokinase	required
STMMW_17731	ychM	1871374	1873035	1	314	0.0836342	1662	139	putative sulphate transporter	not required
STMMW_17741	ychH	1873080	1873358	-1	49	0.0501792	279	14	putative exported protein	ambiguous
STMMW_17751	pth	1873610	1874218	1	6	0.00656814	609	4	PTH	required
STMMW_17761	ychF	1874335	1875426	1	95	0.0201465	1092	22	putative ATP/GTP-binding protein	required
STMMW_17771	STMMW_17771	1875585	1876850	-1	65	0.0379147	1266	48	conserved hypothetical protein	required
STMMW_17781	hyaA	1877345	1878463	1	234	0.0884718	1119	99	hydrogenase-1 small subunit	not required
STMMW_17791	STMMW_17791	1878460	1880253	1	547	0.124303	1794	223	hydrogenase-1 large chain (nifE hydrogenase)	not required
STMMW_17801	hyaC	1880272	1881003	1	341	0.161202	732	118	probable Ni/Fe-hydrogenase 1 b-type cytochrome subunit	not required
STMMW_17811	hyaD	1881000	1881596	1	238	0.137353	597	82	hydrogenase-1 operon protein HyaD	not required
STMMW_17821	hyaE	1881586	1881990	1	201	0.190123	405	77	hydrogenase-1 operon protein HyaE	not required
STMMW_17831	hyaF	1881987	1882835	1	630	0.221437	849	188	hydrogenase-1 operon protein HyaF	not required
STMMW_17841	appC	1882910	1884454	1	501	0.139159	1545	215	cytochrome bd-II oxidase subunit I (pseudogene)	not required
STMMW_17851	appB	1884466	1885602	1	453	0.120493	1137	137	probable cytochrome oxidase subunit II	not required
STMMW_17861	STMMW_17861	1885615	1885704	1	44	0.211111	90	19	hypothetical protein	not required
STMMW_17871	STMMW_17871	1886048	1887373	1	400	0.107843	1326	143	glutamate dehydrogenase	not required
STMMW_17881	treA	1887587	1889299	1	353	0.0887332	1713	152	Alpha,alpha-trehalase	not required
STMMW_17891	ymgE	1889362	1889616	-1	85	0.113725	255	29	putative membrane protein	not required
STMMW_17901	ycgR	1889785	1890519	1	190	0.108844	735	80	conserved hypothetical protein	not required
STMMW_17911	emtA	1890533	1891144	-1	198	0.133987	612	82	membrane-bound lytic murein transglycosylase E	not required
STMMW_17921	ldcA	1891315	1892229	1	8	0.00765027	915	7	conserved hypothetical protein	required
STMMW_17931	cvrA	1892326	1894059	1	488	0.117647	1734	204	Cell volume regulation protein A. Cell volume regulation protein A homolog	not required
STMMW_17941	alra	1894122	1895192	-1	184	0.0756303	1071	81	alanine racemase	not required
STMMW_17951	dadA	1895206	1896504	-1	249	0.0923788	1299	120	D-amino acid dehydrogenase	not required
STMMW_17961	ycgB	1896827	1898359	1	837	0.190476	1533	292	conserved hypothetical protein	not required
STMMW_17971	fadR	1898406	1899125	-1	95	0.0569444	720	41	Fatty acid metabolism regulator protein	ambiguous
STMMW_17981	nhaB	1899345	1900889	1	1229	0.205178	1545	317	Na /H antiporter	not required
STMMW_17991	dsbB	1901031	1901561	1	154	0.12806	531	68	Disulfide oxidoreductase	not required
STMMW_18001	STMMW_18001	1901670	1902011	1	70	0.0906433	342	31	conserved hypothetical protein	not required
STMMW_18011	STMMW_18011	1902083	1902256	-1	28	0.091954	174	16	conserved hypothetical protein	not required
STMMW_18021	STMMW_18021	1902448	1902585	-1	27	0.123188	138	17	hypothetical protein	not required
STMMW_18031	ycgN	1902937	1903398	-1	107	0.121212	462	56	Hypothetical UPF0260 protein <ORFName>	not required
STMMW_18041	ycgM	1903476	1904135	-1	211	0.116667	660	77	putative hydrolase	not required
STMMW_18051	ycgL	1904185	1904517	-1	106	0.138138	333	46	conserved hypothetical protein	not required
STMMW_18061	minC	1904604	1905311	1	344	0.162429	708	115	Probable septum site-determining protein minC	not required
STMMW_18071	minD	1905335	1906147	1	270	0.114391	813	93	septum site determining protein	not required
STMMW_18081	minE	1906151	1906417	1	34	0.0524345	267	14	Cell division topological specificity factor	ambiguous
STMMW_18091	rnd	1906539	1907666	-1	240	0.10461	1128	118	Ribonuclease D	not required
STMMW_18092	tnpA_1a	1907802	1908131	-1	1474	0.8	330	264	mobile element protein	not required
STMMW_18101	fadD	1908451	1910136	-1	504	0.10261	1686	173	long-chain-fatty-acid--CoA ligase	not required
STMMW_18111	yeaY	1910341	1910922	-1	148	0.0927835	582	54	putative lipoprotein	not required
STMMW_18121	yeaZ	1910994	1911689	-1	22	0.00862069	696	6	conserved hypothetical protein	required
STMMW_18131	yoaA	1911747	1913657	-1	678	0.117739	1911	225	putative ATP-dependent helicase	not required
STMMW_18141	yoaB	1913788	1914132	1	101	0.118841	345	41	conserved hypothetical protein	not required
STMMW_18151	yoaH	1914138	1914317	-1	53	0.144444	180	26	Hypothetical UPF0181 protein <ORFName>	not required
STMMW_18161	pabB	1914398	1915762	1	564	0.130403	1365	178	para-aminobenzoate synthase component I	not required
STMMW_18171	yeaB	1915766	1916344	1	251	0.134715	579	78	conserved hypothetical protein	not required
STMMW_18181	sdaA	1916608	1917972	1	450	0.112821	1365	154	L-serine deaminase 1	not required
STMMW_18191	STMMW_18191	1918008	1919711	1	786	0.174883	1704	298	conserved hypothetical protein	not required
STMMW_18201	yoaE	1919733	1921292	-1	854	0.189103	1560	295	putative membrane protein	not required
STMMW_18211	STMMW_18211	1921280	1921615	-1	153	0.184524	336	62	conserved hypothetical protein	not required
STMMW_18221	manX	1921765	1922733	1	323	0.132095	969	128	PTS system, mannose-specific IIab component	not required
STMMW_18231	manY	1922786	1923586	1	304	0.131086	801	105	phosphotransferase enzyme II, C component	not required
STMMW_18241	manZ	1923590	1924450	1	335	0.148664	861	128	phosphotransferase enzyme II, D component	not required
STMMW_18251	STMMW_18251	1924508	1924966	1	163	0.126362	459	58	putative membrane protein	not required
STMMW_18261	yebN	1925376	1925942	1	116	0.0758377	567	43	putative membrane protein	not required
STMMW_18271	rrmA	1925939	1926748	-1	251	0.114815	810	93	rRNA guanine-N1-methyltransferase	not required
STMMW_18281	ftsI2	1926814	1928559	-1	394	0.0790378	1746	138	penicillin-binding protein	not required
STMMW_18291	cspC	1928779	1928988	-1	437	0.357143	210	75	cold shock-like protein CspC	not required
STMMW_18292	yobF	1929001	1929144	-1	159	0.333333	144	48	hypothetical protein	not required
STMMW_18293	STMMW_18293	1929793	1930080	-1	44	0.0659722	288	19	hypothetical protein	ambiguous
STMMW_18294	yobG	1930151	1930294	-1	120	0.256944	144	37	putative inner membrane protein	not required
STMMW_18301	STMMW_18301	1930452	1930691	1	298	0.3125	240	75	putative exported protein	not required
STMMW_18311	kdgR	1930903	1931694	-1	385	0.22601	792	179	transcriptional regulator KdgR	not required
STMMW_18321	STMMW_18321	1931870	1933243	1	433	0.122271	1374	168	putative membrane transport protein	not required
STMMW_18331	htpX	1933291	1934172	-1	257	0.121315	882	107	heat shock protein	not required
STMMW_18341	prc	1934366	1936414	-1	99	0.0356271	2049	73	tail-specific protease precursor	required
STMMW_18351	proQ	1936434	1937120	-1	587	0.232897	687	160	ProP effector	not required
STMMW_18361	yebR	1937218	1937802	-1	176	0.126496	585	74	conserved hypothetical protein	not required
STMMW_18371	yebS	1937844	1939127	1	560	0.157321	1284	202	putative membrane protein	not required
STMMW_18381	STMMW_18381	1939096	1941729	1	1827	0.230448	2634	607	putative membrane protein	not required
STMMW_18391	yebU	1941807	1943246	1	616	0.147222	1440	212	conserved hypothetical protein	not required
[truncated: 2,972 more rows]

## Sheet: c. InSPI2 (output)
locus_tag	gene_name	start	end	strand	read_count	ins_index	gene_length	ins_count	function	call
[truncated: 4,823 more rows]

[truncated: 4 more sheets: d. Input 1 (for Macrophage), e. Input 2 (for Macrophage), f. Macrophage 1 (output), g. Macrophage 2 (output)]
